# Supplementary material
Source: PubMed Central journal article supplement (PMC2802209)
Supplement: NIHMS160714-supplement-1_si_001.pdf [file NIHMS160714-supplement-1_si_001.pdf]

# Supporting Information for

## A New Organocatalyzed Michael-Michael Cascade Reaction Generates Highly Substituted Fused Carbocycles

Patrick G. McGarraugh, Stacey E. Brenner

*Department of Chemistry, Brooklyn College and the City University Of New York, 2900 Bedford Avenue, Brooklyn, NY 11210, USA*

*SBrenner@brooklyn.cuny.edu*

### Contents

|                                                                                                   |     |
|---------------------------------------------------------------------------------------------------|-----|
| General Information                                                                               | S1  |
| Preparation of catalysts ( <b>1a-e</b> ) and starting enals ( <b>3b</b> , <b>3c</b> , <b>3e</b> ) | S1  |
| Preparation of $\beta$ -ketoesters ( <b>9a-c</b> ) and characterization ( <b>9b-c</b> )           | S1  |
| General Procedure for synthesis of carbocycles ( <b>10-11</b> , <b>17-24</b> )                    | S2  |
| Determination of absolute configurations                                                          | S2  |
| Formation and Characterization of alcohol <b>26</b>                                               | S4  |
| Characterization of carbocycles ( <b>10-11</b> , <b>17-24</b> )                                   | S5  |
| References                                                                                        | S11 |
| $^1\text{H}$ , $^{13}\text{C}$ NMR spectra and HPLC chromatograms                                 | S13 |

### General Information

All chemicals and solvents were purchased from Sigma-Aldrich or Fisher Scientific.  $^1\text{H}$  and  $^{13}\text{C}$  NMR spectra were collected using a Bruker 400 MHz Biospin. The NMR data herein uses the following abbreviations: s=singlet, d=doublet, t=triplet, q=quartet, m=multiplet, dd=doublet of doublets, td=triplet of doublets, dt=doublet of triplets. Enantiomeric excesses were determined using a Perkin Elmer Series 200 HPLC with Daicel Chemical Industries, LTD. Chiralpak AD-H (0.46 x 25 cm), Chiralpak OD-H (0.46 x 25 cm), and Chiralpak AS-H (0.46 x 25 cm) columns. Optical rotations were determined using a Jasco P-1020 polarimeter. IR spectra were collected using a Nicolet 6700 FT-IR. High resolution mass spectra were collected using an Agilent 6520 Q-TOF. Flash chromatography was carried out with Merck, grade 9385, 230-400 mesh, 600 Å silica gel and with Merck, silica 60F-254 on glass, 250 μm layer TLC plates with fluorescent indicator. Solvents were dried and kept air free in a solvent purification unit. Solvents were evaporated using a standard rotovapor and a high vacuum. All reactions were carried out in oven dried glassware and conducted under an argon atmosphere.

### Preparation of catalysts (1a-e) and starting enals (3b, 3c, 3e)

Catalysts **1a-e**<sup>1,2</sup> were prepared from the corresponding diarylprolinols<sup>3</sup> using known procedures. Noncommercially available enals **3b**, **3c**, and **3e**, were prepared according to a known procedure.<sup>4</sup>

### Preparation of β-ketoesters (9a-c) and characterization (9b-c)

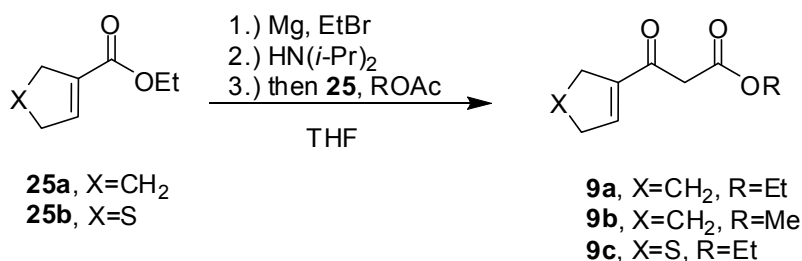

The β-ketoester **9a** was prepared using an adapted procedure.<sup>5</sup> To a two-neck, round-bottom flask equipped with an internal thermometer was added magnesium metal (2.5 g, 103 mmol) and THF (21 mL). Bromoethane (7.5 mL, 100 mmol) was slowly added to this solution while maintaining the internal temperature below 25 °C. The mixture was allowed to stir at room temperature until all the metal had reacted (~1h). The flask was equipped with an outlet and a solution of diisopropylamine (14.2 ml, 100 mmol) in THF (21 mL) was slowly added while maintaining the internal temperature below 25 °C. The mixture was allowed to stir at room temperature for 3h. The temperature of the mixture was lowered to 10 °C and a solution of **25a**<sup>6</sup> (7.0 g, 50 mmol), ethyl acetate (4.90 mL, 50 mmol), and THF (35 mL) was added while maintaining the internal temperature between 10-15 °C. The reaction was allowed to stir at room temperature for 3h and the reaction was poured into 4M H<sub>2</sub>SO<sub>4</sub> (aq) with ice. The mixture was extracted three times with Et<sub>2</sub>O. The ether extracts were combined, dried over MgSO<sub>4</sub>, filtered and concentrated. The mixture was purified via flash chromatography (97/3, petroleum ether/Et<sub>2</sub>O) and β-ketoester **9a** was isolated in 70% yield. Characterization of **9a** was in agreement with experimental data.<sup>5</sup>

β-ketoesters **9b** and **9c** were prepared from **25a**<sup>6</sup> and **25b**<sup>7</sup>, respectively, using the same procedure and were obtained in similar yields.

**9b**: methyl 3-cyclopentenyl-3-oxopropanoate

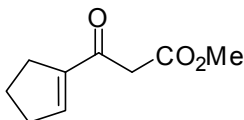

pale yellow oil. IR (thin film, KBr): 2954, 2843, 1747, 1656, 1588, 1445, 1363, 1263, 1209, 1063, 1004, 954, 800, 729  $\text{cm}^{-1}$ ;  $^1\text{H}$  NMR (400 MHz,  $\text{CDCl}_3$ ), keto form:  $\delta$  6.79 (m, 1H), 3.73 (s, 3H), 3.71 (s, 2H), 2.59 (m, 4H), 1.95 (quintet,  $J = 7.6$  Hz, 2H) ppm, enol form:  $\delta$  11.75 (s, 1H), 6.61 (m, 1H), 5.06 (s, 1H), 3.75 (s, 3H), 2.52-2.46 (m, 4H), 1.97 (m, 2H) ppm;  $^{13}\text{C}$  NMR (100 MHz,  $\text{CDCl}_3$ ), keto and enol form:  $\delta$  190.3, 173.5, 168.5, 168.1, 146.1, 145.5, 138.2, 137.6, 88.5, 52.4, 51.3, 46.1, 31.2, 33.6, 31.0, 30.7, 23.2, 22.9 ppm. HRMS (ESI) :  $[\text{M}^+]$  calcd for  $[\text{C}_9\text{H}_{12}\text{O}_3]$ : 168.0786, found: 168.0790.

**9c:** ethyl 3-(2,5-dihydrothiophen-3-yl)-3-oxopropanoate

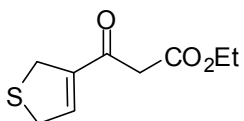

pale yellow oil. IR (thin film, KBr): 2982, 1740, 1675, 1599, 1422, 1252, 1222, 1182, 1034, 797  $\text{cm}^{-1}$ ;  $^1\text{H}$  NMR (400 MHz,  $\text{CD}_3\text{OD}$ ), keto form:  $\delta$  7.06 (m, 1H), 4.17 (q,  $J = 7.1$  Hz, 2H), 4.00 (m, 2H), 3.87 (m, 2H), 3.84 (s, 2H), 1.26 (t,  $J = 7.2$  Hz, 3H) ppm, enol form:  $\delta$  6.73 (m, 1H), 5.15 (s, 1H), 4.22 (q,  $J = 7.1$  Hz, 2H), 3.88-3.82 (m, 4H), 1.28 (t,  $J = 7.2$  Hz, 3H) ppm;  $^{13}\text{C}$  NMR (100 MHz,  $\text{CDCl}_3$ ), keto and enol form:  $\delta$  189.3, 172.7, 167.0, 166.7, 144.0, 142.2, 136.8, 134.3, 90.0, 61.6, 60.5, 46.9, 39.7, 39.2, 37.0, 36.5, 14.3, 14.2 ppm. HRMS (ESI) :  $[\text{M}^+]$  calcd for  $[\text{C}_9\text{H}_{12}\text{O}_3\text{S}]$ : 200.0507, found: 200.0512.

#### General Procedure for synthesis of carbocycles (10-11, 17-24)

To an oven dried flask was added catalyst **1a** (32.6 mg, 0.1 mmol), solvent (3.33 mL),  $\beta$ -ketoester **9a** (182.2 mg, 1.0 mmol), and enal **3a** (177.2 mg, 1.0 mmol). The reaction was allowed to stir for the indicated time at room temperature. The reaction mixture was filtered through a plug of silica and concentrated. The percent conversion of the crude reaction mixture could be determined using an internal standard. The diastereomeric mixture of **10a**, **10b** and **11** was then purified via column chromatography (85/15, petroleum ether/ $\text{Et}_2\text{O}$ ) and an isolated yield was determined. The diastereomeric ratio of the isolated product was determined through comparison of the relative integrations of the aldehyde and/or enol peaks in the  $^1\text{H}$  NMR spectrum. Samples of the pure diastereomers **10a**, **10b** and **11** were obtained through further flash chromatography. Carbocycles **17-24** were prepared and purified using the same procedure.

Racemic samples of the Michael-Michael products **10-11** and **17-24** were prepared in a similar manner using racemic catalyst **1a**.

#### Determination of absolute configurations

The stereochemistry of **10a** at C3 was assigned by analogy to other **1a**-catalyzed conjugate additions. The relative configuration of Michael-Michael product **10a** was determined via X-ray crystallography.

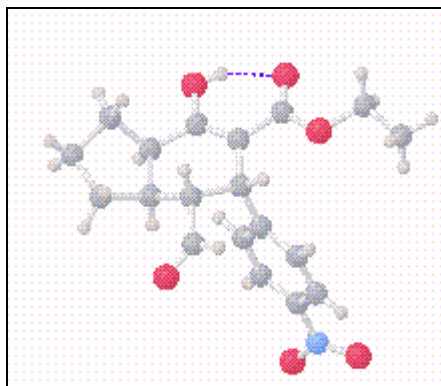

**10a**

It was established that **10b** was the *C4* epimer of **10a** by subjecting pure **10a** to **1a** (20 mol %) and benzoic acid (20 mol %) in EtOH (0.3 M), which produced a mixture of **10a** and **10b**. The configurations of Michael-Michael products **17-24a** and **17-24b** were assigned by analogy.

The configuration of **11** was assigned as one of the two structures shown below, using NOE.

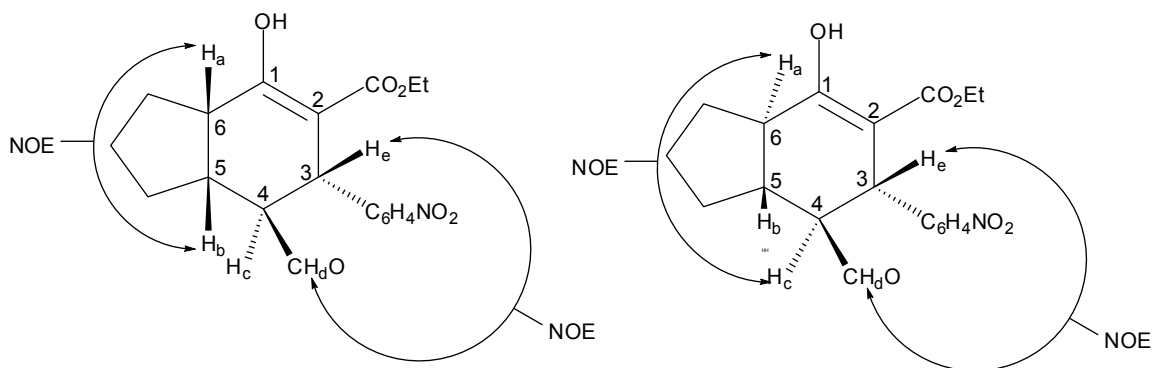

An NOE interaction between  $H_e$  and  $H_d$  was observed indicating that the aldehyde functionality at the *C4* position was *cis* to  $H_e$ . The signals for  $H_b$  and  $H_c$  overlapped completely, complicating further analysis of NOE interactions. However, another NOE interaction was observed between  $H_a$  and the overlapping  $^1\text{H}$  signals for  $H_b$  and  $H_c$ . This indicated that the  $H_a$  proton was *cis* to either  $H_b$  or  $H_c$ . Due to the overlapping of the  $^1\text{H}$  signals for  $H_b$  and  $H_c$ , the stereochemistry at *C6* could not be determined from the NOE spectrum of **11**.

Aldehyde **11** was silylated and reduced to alcohol **26** (see below). The nature of the ring junction in **26** was determined using NOE. An NOE interaction between  $H_a$  and  $H_b$  was observed indicating that the ring junction in **26** was *cis*. Thus, it was determined that the ring junction in **11** was *cis*, having the configuration shown below.

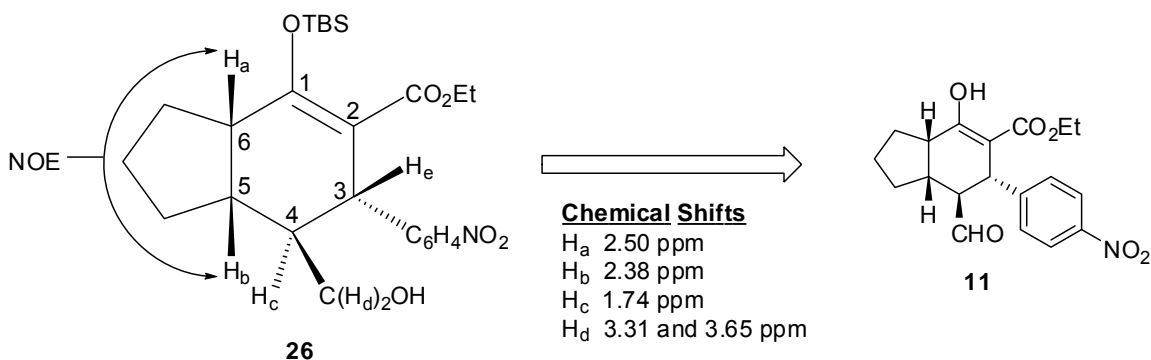

### Formation and Characterization of Alcohol 26

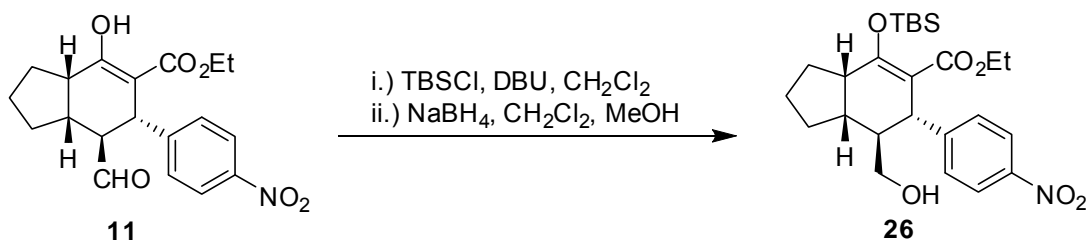

To an oven dried flask was added ( $\pm$ )-**11** (13.0 mg, 36  $\mu$ mol), CH<sub>2</sub>Cl<sub>2</sub> (1.4 mL), and TBSCl (11.3 mg, 75  $\mu$ mol). DBU (11.2  $\mu$ L, 75  $\mu$ mol) was added dropwise to the stirring solution of ( $\pm$ )-**11**. The reaction was monitored by TLC and was quenched when ( $\pm$ )-**11** was completely consumed (~1.5 h). The reaction was diluted with CH<sub>2</sub>Cl<sub>2</sub> (15 mL) and washed with saturated NH<sub>4</sub>Cl (aq) (15 mL). The aqueous layer was washed with CH<sub>2</sub>Cl<sub>2</sub> (2 x 15 mL). The organic layers were combined, dried over Na<sub>2</sub>SO<sub>4</sub>, filtered and concentrated. The silylated intermediate was purified via column chromatography (90/10, petroleum ether/Et<sub>2</sub>O) and used in step ii.).

To an oven dried flask was added, the silylated intermediate from step i.) (17.1 mg, 36  $\mu$ mol) and a 1/1 mixture of MeOH/CH<sub>2</sub>Cl<sub>2</sub> (1 mL). The stirring solution was cooled in an ice bath and NaBH<sub>4</sub> (9.5 mg, 252  $\mu$ mol) was added. The reaction was stirred at 0° C and was monitored by TLC. The reaction was quenched after the silylated intermediate was completely consumed (~30 min). The reaction was diluted with CH<sub>2</sub>Cl<sub>2</sub> (15 mL) and washed with saturated NH<sub>4</sub>Cl (aq) (15 mL). The aqueous layer was washed with CH<sub>2</sub>Cl<sub>2</sub> (2 x 15 mL). The organic layers were combined, dried over Na<sub>2</sub>SO<sub>4</sub>, filtered and concentrated. Alcohol ( $\pm$ )-**26** was purified via column chromatography (80/20, petroleum ether/EtOAc).

**26:** (3*a*S,6*S*,7*S*,7*a*S)-ethyl 4-(*tert*-butyldimethylsilyloxy)-7-(hydroxymethyl)-6-(4-nitrophenyl)-2,3,3*a*,6,7,7*a*-hexahydro-1*H*-indene-5-carboxylate

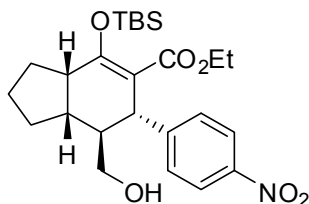

colorless crystals. m.p.: 135-137 °C. IR (thin film, KBr): 3444, 2956, 2931, 2859, 1704, 1519, 1347, 1255, 1201, 1062, 781, 704 cm<sup>-1</sup>; <sup>1</sup>H NMR (400 MHz, CDCl<sub>3</sub>)  $\delta$  8.10 (d, *J* = 8.5 Hz, 2H), 7.42 (d, *J* = 8.6 Hz, 2H), 4.15 (d, *J* = 9.0 Hz, 1H), 3.87 (m, 1H), 3.72 (m, 1H), 3.65 (dd, *J* = 3.4, 11.1 Hz, 1H), 3.31 (dd, *J* = 2.6, 11.1 Hz, 1H), 2.50 (q, *J* = 8.1 Hz, 1H), 2.38 (m, 1H), 2.14 (m, 1H), 1.74 (m, 3H), 1.51-1.60 (m, 3H), 0.94 (s, 9H), 0.86 (t, *J* = 7.1 Hz, 3H), 0.17 (s, 3H), 0.15 (s, 3H) ppm; <sup>13</sup>C NMR (100 MHz, CDCl<sub>3</sub>)  $\delta$  167.5, 158.8, 152.9, 146.7, 129.4, 123.5, 112.1, 61.2,

59.9, 45.0, 44.9, 44.6, 38.2, 31.3, 29.9, 25.9, 24.1, 18.5, 14.0, -3.8, -3.8 ppm; HRMS (ESI) :  $[M]^+$  calcd for  $[C_{25}H_{37}NO_6Si]$ : 475.2390, found: 475.2390.

### Characterization of carbocycles (10-11, 17-24)

**10a:** (3aR,6S,7R,7aS)-ethyl 7-formyl-4-hydroxy-6-(4-nitrophenyl)-2,3,3a,6,7,7a-hexahydro-1H-indene-5-carboxylate

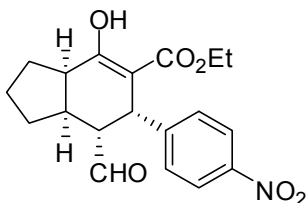

colorless crystals. m.p.: 84-86 °C.  $[\alpha]_D^{23} = +177.8$  (c 1.00,  $CH_2Cl_2$ , 99% ee); IR (thin film, KBr): 2962, 2870, 1721, 1650, 1615, 1519, 1348, 1280, 1243, 1213, 855, 826, 706  $cm^{-1}$ ;  $^1H$  NMR (400 MHz,  $CDCl_3$ )  $\delta$  12.54 (s, 1H), 9.38 (d,  $J = 1.7$  Hz, 1H), 8.13 (d,  $J = 8.7$  Hz, 2H), 7.26 (d,  $J = 8.7$  Hz, 2H), 4.45 (d,  $J = 3.9$  Hz, 1H), 4.05 (m, 2H), 2.98 (q,  $J = 8.2$  Hz, 1H), 2.59 (m, 2H), 2.32 (m, 1H), 2.06 (m, 1H), 1.80 (m, 1H), 1.59 (m, 2H), 1.33 (m, 1H), 1.07 (t,  $J = 7.1$  Hz, 3H) ppm;  $^{13}C$  NMR (100 MHz,  $CDCl_3$ )  $\delta$  203.2, 176.0, 171.2, 147.8, 147.3, 129.9, 123.6, 99.1, 60.9, 54.5, 43.2, 41.5, 32.5, 31.7, 31.3, 25.0, 14.1 ppm; the enantiomeric excess was determined by HPLC with an AS-H column (*n*-hexane: *i*-PrOH = 99:1), 1.0 mL/min; major enantiomer  $t_R = 20.7$  min, minor enantiomer  $t_R = 24.8$  min. HRMS (ESI) :  $[M]$  calcd for  $[C_{19}H_{21}NO_6]$ : 359.1369, found: 359.1377.

**10b:** (3aR,6S,7S,7aS)-ethyl 7-formyl-4-hydroxy-6-(4-nitrophenyl)-2,3,3a,6,7,7a-hexahydro-1H-indene-5-carboxylate

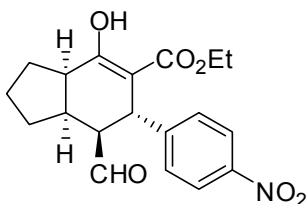

colorless amorphous solid.  $[\alpha]_D^{23} = +65.9$  (c 0.500,  $CH_2Cl_2$ , 99% ee); IR (thin film, KBr): 2958, 1721, 1647, 1608, 1519, 1347, 1235, 1109, 853  $cm^{-1}$ ;  $^1H$  NMR (400 MHz,  $CDCl_3$ )  $\delta$  12.65 (s, 1H), 9.66 (d,  $J = 1.5$  Hz, 1H), 8.13 (d,  $J = 8.8$  Hz, 2H), 7.38 (d,  $J = 8.8$  Hz, 2H), 4.34 (d,  $J = 7.8$  Hz, 1H), 3.93 (m, 2H), 3.00 (q,  $J = 6.3$  Hz, 1H), 2.79 (m, 1H), 2.57 (m, 1H), 2.07 (m, 1H), 1.98 (m, 1H), 1.71 (m, 3H), 1.55 (m, 1H), 0.87 (t,  $J = 7.1$  Hz, 3H) ppm;  $^{13}C$  NMR (100 MHz,  $CDCl_3$ )  $\delta$  201.2, 174.8, 171.7, 153.1, 146.8, 129.0, 123.7, 98.3, 60.8, 56.3, 43.5, 37.7, 36.9, 29.6, 26.1, 23.9, 13.8 ppm; the enantiomeric excess was determined by HPLC with an AS-H column (*n*-hexane: *i*-PrOH = 99:1), 1.0 mL/min; minor enantiomer  $t_R = 27.4$  min, major enantiomer  $t_R = 32.3$  min. HRMS (ESI) :  $[M]$  calcd for  $[C_{19}H_{21}NO_6]$ : 359.1369, found: 359.1370.

**11:** (6S,7S,7aR)-ethyl 7-formyl-4-hydroxy-6-(4-nitrophenyl)-2,3,3a,6,7,7a-hexahydro-1H-indene-5-carboxylate

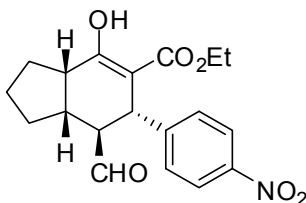

colorless crystals. m.p.: 95-97 °C.  $[\alpha]_D^{25} = +20.1$  (c 0.500, CH<sub>2</sub>Cl<sub>2</sub>, 37% ee); IR (thin film, KBr): 2963, 2874, 1725, 1650, 1613, 1519, 1348, 1286, 1228, 855 cm<sup>-1</sup>; <sup>1</sup>H NMR (400 MHz, CDCl<sub>3</sub>) δ 12.59 (s, 1H), 9.66 (d, *J* = 1.2 Hz, 1H), 8.13 (d, *J* = 8.7 Hz, 2H), 7.31 (d, *J* = 8.7 Hz, 2H), 4.35 (d, *J* = 5.9 Hz, 1H), 3.95 (m, 2H), 2.80 (q, *J* = 7.6 Hz, 1H), 2.58 (m, 2H), 2.29 (m, 1H), 1.52-1.78 (m, 4H), 1.28 (m, 1H), 0.86 (t, *J* = 7.1 Hz, 3H) ppm; <sup>13</sup>C NMR (100 MHz, CDCl<sub>3</sub>) δ 202.0, 176.1, 171.6, 152.9, 146.7, 128.3, 123.9, 97.1, 60.8, 56.5, 42.0, 39.9, 37.4, 31.0, 29.9, 24.2, 13.9 ppm; the enantiomeric excess was determined by HPLC with an AS-H column (*n*-hexane: *i*-PrOH = 95:5), 1.0 mL/min; major enantiomer *t*<sub>R</sub> = 22.5 min, minor enantiomer *t*<sub>R</sub> = 66.5 min. HRMS (ESI) : [M]<sup>+</sup> calcd for [C<sub>19</sub>H<sub>21</sub>NO<sub>6</sub>]: 359.1369, found: 359.1370.

**17a:** (3*a*R,6*S*,7*R*,7*a*S)-ethyl 6-(4-chlorophenyl)-7-formyl-4-hydroxy-2,3,3*a*,6,7,7*a*-hexahydro-1*H*-indene-5-carboxylate

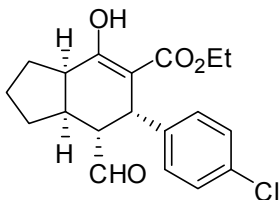

colorless amorphous solid.  $[\alpha]_D^{24} = +120.7$  (c 1.00, CH<sub>2</sub>Cl<sub>2</sub>, 99% ee); IR (thin film, KBr): 2961, 2871, 1723, 1650, 1616, 1279, 1242, 1213, 1093, 832 cm<sup>-1</sup>; <sup>1</sup>H NMR (400 MHz, CDCl<sub>3</sub>) δ 12.51 (s, 1H), 9.32 (d, *J* = 2.8 Hz, 1H), 7.22 (d, *J* = 8.4 Hz, 2H), 7.01 (d, *J* = 8.4 Hz, 2H), 4.31 (d, *J* = 4.9 Hz, 1H), 4.05 (m, 2H), 2.88 (q, *J* = 8.6 Hz, 1H), 2.60 (m, 1H), 2.48 (m, 1H), 2.29 (m, 1H), 2.02 (m, 1H), 1.78 (m, 1H), 1.61 (m, 2H), 1.29 (m, 1H), 1.08 (t, *J* = 7.1 Hz, 3H) ppm; <sup>13</sup>C NMR (100 MHz, CDCl<sub>3</sub>) δ 204.2, 175.4, 171.5, 138.4, 133.0, 130.2, 128.6, 99.7, 60.8, 54.6, 43.2, 41.0, 32.4, 31.6, 31.3, 25.0, 14.1 ppm; the enantiomeric excess was determined by HPLC with an AD-H column (*n*-hexane: *i*-PrOH = 99:1), 0.5 mL/min; major enantiomer *t*<sub>R</sub> = 14.3 min, minor enantiomer *t*<sub>R</sub> = 18.7 min. HRMS (ESI) : [M]<sup>+</sup> calcd for [C<sub>19</sub>H<sub>21</sub>ClO<sub>4</sub>]: 348.1128, found: 348.1129.

**17b:** (3*a*R,6*S*,7*S*,7*a*S)-ethyl 6-(4-chlorophenyl)-7-formyl-4-hydroxy-2,3,3*a*,6,7,7*a*-hexahydro-1*H*-indene-5-carboxylate

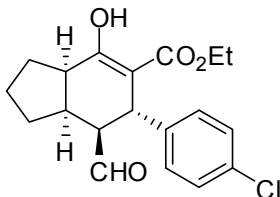

colorless oil.  $[\alpha]_D^{24} = +31.3$  (c 0.500, CH<sub>2</sub>Cl<sub>2</sub>, 98% ee); IR (thin film, KBr): 2958, 2874, 1723, 1647, 1613, 1490, 1308, 1235, 1091, 1014, 841 cm<sup>-1</sup>; <sup>1</sup>H NMR (400 MHz, CDCl<sub>3</sub>) δ 12.59 (s, 1H), 9.68 (d, *J* = 1.7 Hz, 1H), 7.23 (d, *J* = 8.3 Hz, 2H), 7.11 (d, *J* = 8.4 Hz, 2H), 4.19 (d, *J* = 7.0 Hz, 1H), 3.96 (m, 2H), 2.94 (q, *J* = 7.3 Hz, 1H), 2.70 (m, 1H), 2.52 (m, 1H), 2.08 (m, 1H), 1.88 (m, 1H), 1.78-1.87 (m, 4H), 0.92 (t, *J* = 7.2 Hz, 3H) ppm; <sup>13</sup>C NMR (100 MHz, CDCl<sub>3</sub>) δ 202.5, 174.4, 172.0, 143.3, 132.2, 129.4, 128.6, 98.7, 60.6, 56.5, 43.4, 37.6, 36.7, 29.8, 26.4, 24.1, 13.8 ppm; the enantiomeric excess was determined by HPLC with an AD-H column (*n*-hexane: *i*-PrOH = 99:1), 0.3 mL/min; major enantiomer *t*<sub>R</sub> = 24.3 min, minor enantiomer *t*<sub>R</sub> = 31.6 min. HRMS (ESI) : [M]<sup>+</sup> calcd for [C<sub>19</sub>H<sub>21</sub>ClO<sub>4</sub>]: 348.1128, found: 348.1131.

**18a:** (3*a*R,6*S*,7*R*,7*a*S)-ethyl 7-formyl-4-hydroxy-6-(3-(trifluoromethyl)phenyl)-2,3,3*a*,6,7,7*a*-hexahydro-1*H*-indene-5-carboxylate

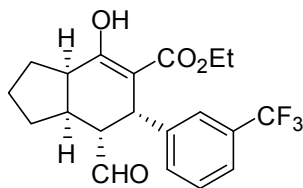

colorless oil.  $[\alpha]_D^{24} = +126.1$  (c 1.00,  $\text{CH}_2\text{Cl}_2$ , 99% ee); IR (thin film, KBr): 2964, 2872, 1724, 1651, 1618, 1328, 1244, 1165, 1126, 1033, 831, 806, 708  $\text{cm}^{-1}$ ;  $^1\text{H}$  NMR (400 MHz,  $\text{CDCl}_3$ )  $\delta$  12.52 (s, 1H), 9.34 (d,  $J = 2.6$  Hz, 1H), 7.47 (d,  $J = 7.8$  Hz, 1H), 7.38 (t,  $J = 7.7$  Hz, 1H), 7.32 (s, 1H), 7.28 (d,  $J = 8.5$  Hz, 1H), 4.39 (d,  $J = 4.9$  Hz, 1H), 4.04 (m, 2H), 2.98 (q,  $J = 8.5$  Hz, 1H), 2.62 (m, 1H), 2.53 (m, 1H), 2.31 (m, 1H), 2.05 (m, 1H), 1.79 (m, 1H), 1.63 (m, 2H), 1.07 (m, 1H), 1.05 (t,  $J = 7.1$  Hz, 3H) ppm;  $^{13}\text{C}$  NMR (100 MHz,  $\text{CDCl}_3$ )  $\delta$  203.8, 175.7, 171.4, 141.2, 132.3, 131.0, 130.7, 128.9, 125.6, 124.1, 99.5, 60.8, 54.6, 43.2, 41.5, 32.5, 31.7, 31.4, 25.0, 14.0 ppm; the enantiomeric excess was determined by HPLC with an AD-H column (*n*-hexane: *i*-PrOH = 99:1), 0.2 mL/min; major enantiomer  $t_R = 38.4$  min, minor enantiomer  $t_R = 43.8$  min. HRMS (ESI) :  $[\text{M}]$  calcd for  $[\text{C}_{20}\text{H}_{21}\text{F}_3\text{O}_4]$ : 382.1392, found: 382.1395.

**18b:** (3*a*R,6*S*,7*S*,7*a*S)-ethyl 7-formyl-4-hydroxy-6-(3-(trifluoromethyl)phenyl)-2,3,3*a*,6,7,7*a*-hexahydro-1*H*-indene-5-carboxylate

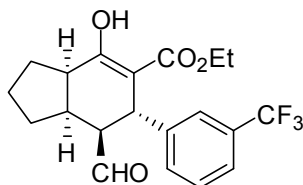

colorless oil.  $[\alpha]_D^{23} = +18.7$  (c 1.00,  $\text{CH}_2\text{Cl}_2$ , 99% ee); IR (thin film, KBr): 2962, 2877, 1724, 1648, 1613, 1329, 1236, 1163, 1125, 836, 802, 705  $\text{cm}^{-1}$ ;  $^1\text{H}$  NMR (400 MHz,  $\text{CDCl}_3$ )  $\delta$  12.63 (s, 1H), 9.68 (d,  $J = 1.8$  Hz, 1H), 7.45 (m, 2H), 7.38 (m, 2H), 4.28 (dd,  $J = 7.6, 1.2$  Hz, 1H), 3.93 (m, 2H), 2.99 (q,  $J = 6.5$  Hz, 1H), 2.78 (m, 1H), 2.55 (m, 1H), 2.07 (m, 1H), 1.95 (m, 1H), 1.57-1.79 (m, 4H), 0.84 (t,  $J = 7.1$  Hz, 3H) ppm;  $^{13}\text{C}$  NMR (100 MHz,  $\text{CDCl}_3$ )  $\delta$  202.0, 174.6, 171.9, 146.1, 131.4, 131.0, 130.7, 128.9, 125.0, 123.3, 98.6, 60.6, 56.4, 43.4, 37.8, 36.8, 29.6, 26.2, 24.0, 13.6 ppm; the enantiomeric excess was determined by HPLC with an AD-H column (*n*-hexane: *i*-PrOH = 99:1), 0.3 mL/min; minor enantiomer  $t_R = 25.3$  min, major enantiomer  $t_R = 30.3$  min. HRMS (ESI) :  $[\text{M}]$  calcd for  $[\text{C}_{20}\text{H}_{21}\text{F}_3\text{O}_4]$ : 382.1392, found: 382.1395.

**19a:** (3*a*R,6*S*,7*R*,7*a*S)-ethyl 7-formyl-4-hydroxy-6-phenyl-2,3,3*a*,6,7,7*a*-hexahydro-1*H*-indene-5-carboxylate

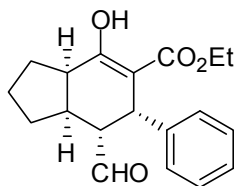

colorless oil.  $[\alpha]_D^{23} = +117.4$  (c 1.00,  $\text{CH}_2\text{Cl}_2$ , 99% ee); IR (thin film, KBr): 2962, 1722, 1648, 1617, 1280, 1243, 1212, 1084, 832, 704  $\text{cm}^{-1}$ ;  $^1\text{H}$  NMR (400 MHz,  $\text{CDCl}_3$ )  $\delta$  12.54 (s, 1H), 9.32 (d,  $J = 3.0$  Hz, 1H), 7.26 (m, 3H), 7.09 (d,  $J = 7.2$  Hz, 2H), 4.35 (d,  $J = 4.9$  Hz, 1H), 4.07 (m, 2H), 2.97 (q,  $J = 9.4$  Hz, 1H), 2.59 (m, 1H), 2.49 (m, 1H), 2.31 (m, 1H), 2.01 (m, 1H), 1.80 (m, 1H), 1.63 (m, 2H), 1.30 (m, 1H), 1.09 (t,  $J = 7.1$  Hz, 3H) ppm;  $^{13}\text{C}$  NMR (100 MHz,  $\text{CDCl}_3$ )  $\delta$  204.7, 175.3, 171.7, 139.7, 128.9, 128.4, 127.1, 99.9, 60.7, 54.8, 43.2, 41.7, 32.5, 31.6, 31.4, 25.0, 14.1 ppm; the enantiomeric excess was determined by HPLC with an AD-H column (*n*-hexane: *i*-PrOH = 99:1), 1.0 mL/min; minor enantiomer  $t_R = 7.0$  min, major enantiomer  $t_R = 8.9$  min. HRMS (ESI) :  $[\text{M}^+]$  calcd for  $[\text{C}_{19}\text{H}_{22}\text{O}_4]$ : 314.1518, found: 314.1520.



**19b:** (3aR,6S,7S,7aS)-ethyl 7-formyl-4-hydroxy-6-phenyl-2,3,3a,6,7,7a-hexahydro-1H-indene-5-carboxylate

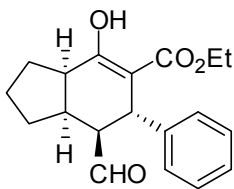

colorless oil.  $[\alpha]_D^{21} = +23.6$  (c 0.500,  $\text{CH}_2\text{Cl}_2$ , 98% ee); IR (thin film, KBr): 2958, 2874, 1720, 1646, 1614, 1234, 1096, 1029, 702  $\text{cm}^{-1}$ ;  $^1\text{H}$  NMR (400 MHz,  $\text{CDCl}_3$ )  $\delta$  12.59 (s, 1H), 9.71 (d,  $J = 2.0$  Hz, 1H), 7.26 (m, 2H), 7.18 (m, 3H), 4.20 (d,  $J = 6.8$  Hz, 1H), 3.95 (m, 2H), 2.93 (q,  $J = 7.7$  Hz, 1H), 2.72 (m, 1H), 2.52 (m, 1H), 2.09 (m, 1H), 1.58-1.89 (m, 5H), 0.88 (t,  $J = 7.1$  Hz, 3H) ppm;  $^{13}\text{C}$  NMR (100 MHz,  $\text{CDCl}_3$ )  $\delta$  203.3, 174.3, 172.2, 144.4, 128.5, 128.0, 126.4, 99.0, 60.5, 56.6, 43.4, 38.4, 36.7, 29.9, 26.5, 24.2, 13.8 ppm; the enantiomeric excess was determined by HPLC with an AD-H column (*n*-hexane: *i*-PrOH = 99:1), 0.3 mL/min; minor enantiomer  $t_R = 24.0$  min, major enantiomer  $t_R = 41.4$  min. HRMS (ESI) :  $[\text{M}^+]$  calcd for  $[\text{C}_{19}\text{H}_{22}\text{O}_4]$ : 314.1518, found: 314.1521.

**20a:** (3aR,6S,7R,7aS)-ethyl 7-formyl-4-hydroxy-6-*p*-tolyl-2,3,3a,6,7,7a-hexahydro-1H-indene-5-carboxylate

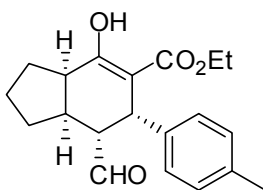

colorless oil.  $[\alpha]_D^{26} = +109.4$  (c 1.00,  $\text{CH}_2\text{Cl}_2$ , 99% ee); IR (thin film, KBr): 2962, 2870, 1722, 1648, 1401, 1379, 1242, 1212, 1083, 1034, 821  $\text{cm}^{-1}$ ; NMR (400 MHz,  $\text{CDCl}_3$ )  $\delta$  12.51 (s, 1H), 9.31 (d,  $J = 3.0$  Hz, 1H), 7.05 (d,  $J = 7.8$  Hz, 2H), 6.95 (d,  $J = 7.8$  Hz, 2H), 4.30 (d,  $J = 4.8$  Hz, 1H), 4.10 (m, 1H), 3.99 (m, 1H), 2.94 (q,  $J = 8.6$  Hz, 1H), 2.65 (m, 1H), 2.44 (m, 1H), 2.29 (s, 3H), 2.29 (m, 1H), 1.99 (m, 1H), 1.77 (m, 1H), 1.60 (m, 2H), 1.27 (m, 1H), 1.09 (t,  $J = 7.1$  Hz, 3H) ppm;  $^{13}\text{C}$  NMR (100 MHz,  $\text{CDCl}_3$ )  $\delta$  204.9, 175.2, 171.8, 136.7, 136.6, 129.1, 128.8, 100.1, 60.7, 54.9, 43.2, 41.2, 32.5, 31.6, 31.4, 25.1, 21.1, 14.1 ppm; the enantiomeric excess was determined by HPLC with an AD-H column (*n*-hexane: *i*-PrOH = 99:1), 0.5 mL/min; major enantiomer  $t_R = 13.0$  min, minor enantiomer  $t_R = 15.1$  min. HRMS (ESI) :  $[\text{M}^+]$  calcd for  $[\text{C}_{20}\text{H}_{24}\text{O}_4]$ : 328.1675, found: 328.1676.

**20b:** (3aR,6S,7S,7aS)-ethyl 7-formyl-4-hydroxy-6-*p*-tolyl-2,3,3a,6,7,7a-hexahydro-1H-indene-5-carboxylate

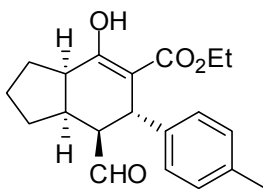

colorless oil.  $[\alpha]_D^{24} = +26.3$  (c 0.800,  $\text{CH}_2\text{Cl}_2$ , 99% ee); IR (thin film, KBr): 2958, 2875, 1721, 1646, 1613, 1307, 1272, 1233, 812  $\text{cm}^{-1}$ ;  $^1\text{H}$  NMR (400 MHz,  $\text{CDCl}_3$ )  $\delta$  12.58 (s, 1H), 9.71 (d,  $J = 2.2$  Hz, 1H), 7.06 (m, 4H), 4.17 (d,  $J = 6.2$  Hz, 1H), 3.97 (m, 2H), 2.91 (q,  $J = 7.3$  Hz, 1H), 2.68 (m, 1H), 2.51 (m, 1H), 2.30 (s, 3H), 2.10 (m, 1H), 1.58-1.85 (m, 5H), 0.93 (t,  $J = 7.2$  Hz, 3H) ppm;  $^{13}\text{C}$  NMR (100 MHz,  $\text{CDCl}_3$ )  $\delta$  204.9, 175.2, 171.8, 136.7, 136.6, 129.1, 128.8, 100.1, 60.7, 54.9, 43.2, 41.2, 32.5, 31.6, 31.4, 25.1, 21.1, 14.1 ppm; the enantiomeric excess was determined by

HPLC with an AS-H column (*n*-hexane: *i*-PrOH = 99:1), 0.5 mL/min; major enantiomer  $t_R$  = 15.7 min, minor enantiomer  $t_R$  = 16.9 min. HRMS (ESI) : [M] calcd for [C<sub>20</sub>H<sub>24</sub>O<sub>4</sub>]: 328.1675, found: 328.1681.

**21a:** (3*aR*,6*R*,7*R*,7*aS*)-ethyl 7-formyl-6-(furan-2-yl)-4-hydroxy-2,3,3*a*,6,7,7*a*-hexahydro-1*H*-indene-5-carboxylate

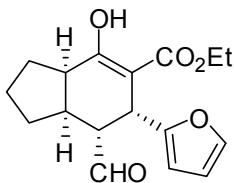

colorless oil.  $[\alpha]_D^{23}$  = +58.9 (*c* 1.00, CH<sub>2</sub>Cl<sub>2</sub>, 98% ee); IR (thin film, KBr): 2963, 2870, 1724, 1648, 1288, 1242, 1081, 834, 741, 599 cm<sup>-1</sup>; <sup>1</sup>H NMR (400 MHz, CDCl<sub>3</sub>)  $\delta$  12.54 (s, 1H), 9.58 (d, *J* = 2.4 Hz, 1H), 7.27 (dd, *J* = 1.8, 0.8 Hz, 1H), 6.24 (dd, *J* = 3.2, 1.9 Hz, 1H), 5.95 (dd, *J* = 2.5, 0.7 Hz, 1H), 4.41 (d, *J* = 4.3 Hz, 1H), 4.16 (m, 2H), 2.86 (q, *J* = 8.9 Hz, 1H), 2.61 (m, 1H), 2.39 (m, 1H), 2.23 (m, 1H), 2.06 (m, 1H), 1.75 (m, 1H), 1.57 (m, 2H), 1.33 (m, 1H), 1.20 (t, *J* = 7.1 Hz, 3H) ppm; <sup>13</sup>C NMR (100 MHz, CDCl<sub>3</sub>)  $\delta$  203.3, 176.2, 171.6, 154.3, 141.9, 110.3, 107.7, 97.8, 60.8, 54.9, 42.8, 34.8, 33.5, 31.8, 31.0, 25.3, 14.2 ppm; the enantiomeric excess was determined by HPLC with an AS-H column (*n*-hexane: *i*-PrOH = 99:1), 0.5 mL/min; major enantiomer  $t_R$  = 23.6 min, minor enantiomer  $t_R$  = 27.2 min. HRMS (ESI) : [M] calcd for [C<sub>17</sub>H<sub>20</sub>O<sub>5</sub>]: 304.1311, found: 304.1316.

**21b:** (3*aR*,6*R*,7*S*,7*aS*)-ethyl 7-formyl-6-(furan-2-yl)-4-hydroxy-2,3,3*a*,6,7,7*a*-hexahydro-1*H*-indene-5-carboxylate

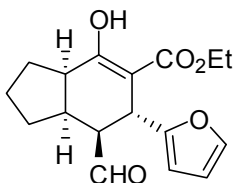

colorless oil.  $[\alpha]_D^{22}$  = -12.3 (*c* 1.00, CH<sub>2</sub>Cl<sub>2</sub>, 98% ee); IR (thin film, KBr): 2961, 2876, 1720, 1647, 1276, 1222, 1086, 1011, 837, 736, 599 cm<sup>-1</sup>; <sup>1</sup>H NMR (400 MHz, CDCl<sub>3</sub>)  $\delta$  12.61 (s, 1H), 9.75 (d, *J* = 1.8 Hz, 1H), 7.29 (d, *J* = 1.0 Hz, 1H), 6.26 (dd, *J* = 3.1, 1.8 Hz, 1H), 5.97 (d, *J* = 3.2 Hz, 1H), 4.32 (d, *J* = 5.4 Hz, 1H), 4.11 (m, 2H), 2.88 (td, *J* = 5.4, 2.1 Hz, 1H), 2.83 (q, *J* = 8.0 Hz, 1H), 2.57 (m, 1H), 2.12 (m, 1H), 1.86 (m, 1H), 1.59-1.77 (m, 4H), 1.12 (t, *J* = 7.1 Hz, 3H) ppm; <sup>13</sup>C NMR (100 MHz, CDCl<sub>3</sub>)  $\delta$  203.0, 175.0, 172.1, 156.4, 141.3, 110.4, 106.5, 96.6, 60.7, 53.4, 43.1, 36.7, 32.9, 30.2, 27.1, 24.5, 14.1 ppm; the enantiomeric excess was determined by HPLC with an AS-H column (*n*-hexane: *i*-PrOH = 99:1), 0.5 mL/min; major enantiomer  $t_R$  = 21.5 min, minor enantiomer  $t_R$  = 27.6 min. HRMS (ESI) : [M] calcd for [C<sub>17</sub>H<sub>20</sub>O<sub>5</sub>]: 304.1311, found: 304.1316.

**22a:** (3*aS*,4*R*,5*R*,7*aR*)-diethyl 4-formyl-7-hydroxy-2,3,3*a*,4,5,7*a*-hexahydro-1*H*-indene-5,6-dicarboxylate

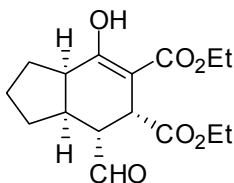

colorless oil.  $[\alpha]_D^{24}$  = +30.2 (*c* 1.00, CH<sub>2</sub>Cl<sub>2</sub>, 98% ee); IR (thin film, KBr): 2979, 2872, 1728, 1652, 1618, 1243, 1189, 1095, 1035, 835 cm<sup>-1</sup>; <sup>1</sup>H NMR (400 MHz, CDCl<sub>3</sub>)  $\delta$  12.47 (s, 1H), 9.78 (d, *J* = 1.5 Hz, 1H), 4.23 (m, 2H), 4.10 (m, 2H), 4.04 (d, *J* = 4.6 Hz, 1H), 2.83 (q, *J* = 9.4 Hz, 1H), 2.68 (m, 1H), 2.36 (m, 1H), 2.18 (m, 2H), 1.75 (m, 1H), 1.58 (m, 2H), 1.37 (m, 1H), 1.29 (t, *J* = 7.1 Hz,

3H), 1.21 (t,  $J = 7.1$  Hz, 3H) ppm;  $^{13}\text{C}$  NMR (100 MHz,  $\text{CDCl}_3$ )  $\delta$  201.6, 176.6, 172.0, 171.4, 96.0, 61.3, 60.9, 52.7, 42.8, 41.3, 34.1, 32.4, 30.8, 25.3, 14.4, 14.3 ppm; the enantiomeric excess was determined by HPLC with an AS-H column (*n*-hexane: *i*-PrOH = 99:1), 1.0 mL/min; major enantiomer  $t_R = 15.1$  min, minor enantiomer  $t_R = 26.4$  min. HRMS (ESI) :  $[\text{M}^+]$  calcd for  $[\text{C}_{16}\text{H}_{22}\text{O}_6]$ : 310.1416, found: 310.1416.

**22b:** (3*a*S,4*S*,5*R*,7*a*R)-diethyl 4-formyl-7-hydroxy-2,3,3*a*,4,5,7*a*-hexahydro-1*H*-indene-5,6-dicarboxylate

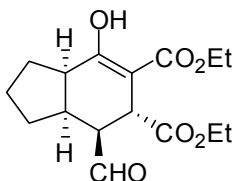

colorless oil.  $[\alpha]_D^{24} = -18.8$  (c 1.00,  $\text{CH}_2\text{Cl}_2$ , 98% ee); IR (thin film, KBr): 2979, 1728, 1654, 1616, 1234, 1183, 1033  $\text{cm}^{-1}$ ;  $^1\text{H}$  NMR (400 MHz,  $\text{CDCl}_3$ )  $\delta$  12.55 (s, 1H), 9.76 (d,  $J = 2.2$  Hz, 1H), 4.10-4.27 (m, 4H), 3.82 (dd,  $J = 8.9, 1.5$  Hz, 1H), 2.87 (m, 2H), 2.56 (m, 1H), 1.98 (m, 1H), 1.86 (m, 1H), 1.79 (m, 1H), 1.65 (m, 2H), 1.49 (m, 1H), 1.27 (t,  $J = 7.1$  Hz, 3H), 1.25 (t,  $J = 7.1$  Hz, 3H) ppm;  $^{13}\text{C}$  NMR (100 MHz,  $\text{CDCl}_3$ )  $\delta$  201.8, 174.8, 174.1, 171.7, 95.2, 61.2, 61.0, 51.1, 43.1, 38.8, 38.0, 29.1, 25.7, 24.0, 14.3, 14.2 ppm; the enantiomeric excess was determined by HPLC with an AD-H column (*n*-hexane: *i*-PrOH = 99:1), 1.0 mL/min; minor enantiomer  $t_R = 29.2$  min, major enantiomer  $t_R = 39.5$  min. HRMS (ESI) :  $[\text{M}^+]$  calcd for  $[\text{C}_{16}\text{H}_{22}\text{O}_6]$ : 310.1416, found: 310.1422.

**23a:** (3*a*R,6*S*,7*R*,7*a*S)-methyl 7-formyl-4-hydroxy-6-(4-nitrophenyl)-2,3,3*a*,6,7,7*a*-hexahydro-1*H*-indene-5-carboxylate

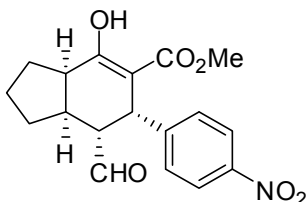

white powder. m.p.: 104-107 °C.  $[\alpha]_D^{23} = +194.4$  (c 1.00,  $\text{CH}_2\text{Cl}_2$ , 97% ee); IR (thin film, KBr): 2955, 2870, 1722, 1653, 1614, 1520, 1442, 1349, 1246, 856, 824, 736, 707  $\text{cm}^{-1}$ ;  $^1\text{H}$  NMR (400 MHz,  $\text{CDCl}_3$ )  $\delta$  12.50 (s, 1H), 9.39 (d,  $J = 1.3$  Hz, 1H), 8.13 (d,  $J = 8.6$  Hz, 2H), 7.25 (d,  $J = 8.6$  Hz, 2H), 4.45 (d,  $J = 3.8$  Hz, 1H), 3.60 (s, 3H), 2.98 (m, 1H), 2.57 (m, 2H), 2.33 (m, 1H), 2.05 (m, 1H), 1.80 (m, 1H), 1.63 (m, 2H), 1.32 (m, 1H) ppm;  $^{13}\text{C}$  NMR (100 MHz,  $\text{CDCl}_3$ )  $\delta$  203.1, 176.3, 171.7, 147.5, 147.3, 129.8, 123.7, 99.0, 54.7, 52.0, 43.2, 41.3, 32.4, 31.7, 31.3, 25.1 ppm; the enantiomeric excess was determined by HPLC with an AD-H column (*n*-hexane: *i*-PrOH = 95:5), 1.0 mL/min; major enantiomer  $t_R = 18.4$  min, minor enantiomer  $t_R = 27.4$  min. HRMS (ESI) :  $[\text{M}^+]$  calcd for  $[\text{C}_{18}\text{H}_{19}\text{NO}_6]$ : 345.1212, found: 345.1218.

**23b:** (3*a*R,6*S*,7*S*,7*a*S)-methyl 7-formyl-4-hydroxy-6-(4-nitrophenyl)-2,3,3*a*,6,7,7*a*-hexahydro-1*H*-indene-5-carboxylate

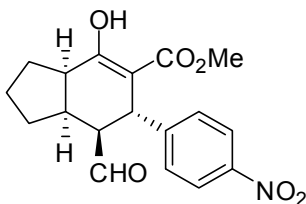

colorless amorphous solid.  $[\alpha]_D^{24} = +73.8$  (c 0.500,  $\text{CH}_2\text{Cl}_2$ , 98% ee); IR (thin film, KBr): 2955, 1721, 1652, 1519, 1441, 1348, 1237, 1109, 832  $\text{cm}^{-1}$ ;  $^1\text{H}$  NMR (400 MHz,  $\text{CDCl}_3$ )  $\delta$  12.58 (s, 1H),

9.68 (d,  $J = 1.6$  Hz, 1H), 8.14 (d,  $J = 8.8$  Hz, 2H), 7.36 (d,  $J = 8.8$  Hz, 2H), 4.36 (d,  $J = 6.6$  Hz, 1H), 3.49 (s, 3H), 2.97 (q,  $J = 7.4$  Hz, 1H), 2.74 (m, 1H), 2.54 (m, 1H), 2.12 (m, 1H), 1.87 (m, 1H), 1.58-1.76 (m, 4H) ppm;  $^{13}\text{C}$  NMR (100 MHz,  $\text{CDCl}_3$ )  $\delta$  201.4, 175.1, 172.1, 152.5, 146.8, 128.8, 123.8, 97.9, 56.4, 51.7, 43.4, 37.9, 36.5, 29.8, 26.5, 24.0 ppm; the enantiomeric excess was determined by HPLC with an AD-H column (*n*-hexane: *i*-PrOH = 99:1), 1.0 mL/min; major enantiomer  $t_{\text{R}} = 46.6$  min, minor enantiomer  $t_{\text{R}} = 52.3$  min. HRMS (ESI) :  $[\text{M}^+]$  calcd for  $[\text{C}_{18}\text{H}_{19}\text{NO}_6]$ : 345.1212, found: 345.1216.

**24a:** (3*a*R,6*S*,7*S*,7*a*R)-ethyl 7-formyl-4-hydroxy-6-(4-nitrophenyl)-1,3,3*a*,6,7,7*a*-hexahydrobenzo[*c*]thiophene-5-carboxylate

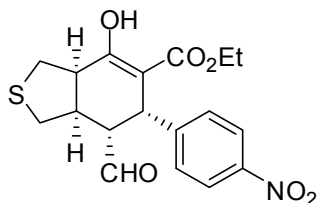

yellow crystals. m.p.: 180-183 °C.  $[\alpha]_{\text{D}}^{22} = +86.7$  (*c* 1.00,  $\text{CH}_2\text{Cl}_2$ , 98% ee); IR (thin film, KBr): 2927, 1654, 1519, 1350, 1248, 1225, 857, 707  $\text{cm}^{-1}$ ;  $^1\text{H}$  NMR (400 MHz,  $\text{CDCl}_3$ )  $\delta$  12.54 (s, 1H), 9.48 (d,  $J = 0.8$  Hz, 1H), 8.15 (d,  $J = 8.4$  Hz, 2H), 7.27 (d,  $J = 8.4$  Hz, 2H), 4.53 (m, 1H), 4.04 (m, 2H), 3.45 (dd,  $J = 11.3, 8.6$  Hz, 1H), 3.24 (m, 2H), 3.00 (d,  $J = 1.5$  Hz, 2H), 2.91 (dd,  $J = 11.3, 9.7$  Hz, 1H), 2.71 (d,  $J = 12.1$  Hz, 1H), 1.03 (t,  $J = 7.1$  Hz, 3H) ppm;  $^{13}\text{C}$  NMR (100 MHz,  $\text{CDCl}_3$ )  $\delta$  201.5, 173.0, 171.0, 147.4, 147.2, 129.8, 123.8, 98.8, 61.2, 50.8, 46.4, 40.9, 36.7, 36.2, 35.6, 14.0 ppm; the enantiomeric excess was determined by HPLC with an AS-H column (*n*-hexane: *i*-PrOH = 90:10), 1.0 mL/min; major enantiomer  $t_{\text{R}} = 22.7$  min, minor enantiomer  $t_{\text{R}} = 35.7$  min. HRMS (ESI) :  $[\text{M}]$  calcd for  $[\text{C}_{18}\text{H}_{19}\text{NO}_6\text{S}]$ : 377.0933, found: 377.0938.

**24b:** (3*a*R,6*S*,7*R*,7*a*R)-ethyl 7-formyl-4-hydroxy-6-(4-nitrophenyl)-1,3,3*a*,6,7,7*a*-hexahydrobenzo[*c*]thiophene-5-carboxylate

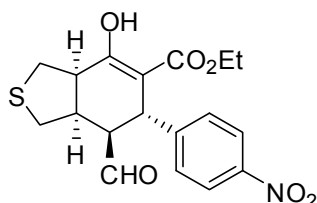

colorless crystals. m.p.: 101-104 °C.  $[\alpha]_{\text{D}}^{23} = +46.8$  (*c* 1.00,  $\text{CH}_2\text{Cl}_2$ , 96% ee); IR (thin film, KBr): 2937, 1721, 1651, 1518, 1348, 1237, 848, 736  $\text{cm}^{-1}$ ;  $^1\text{H}$  NMR (400 MHz,  $\text{CDCl}_3$ )  $\delta$  12.76 (s, 1H), 9.79 (d,  $J = 0.9$  Hz, 1H), 8.14 (d,  $J = 8.6$  Hz, 2H), 7.37 (d,  $J = 8.7$  Hz, 2H), 4.45 (d,  $J = 7.0$  Hz, 1H), 3.97 (m, 2H), 3.40 (q,  $J = 4.5$  Hz, 1H), 3.21 (d,  $J = 5.9$  Hz, 2H), 2.99 (m, 2H), 2.82-2.90 (m, 2H), 0.90 (t,  $J = 7.2$  Hz, 3H) ppm;  $^{13}\text{C}$  NMR (100 MHz,  $\text{CDCl}_3$ )  $\delta$  199.7, 171.4, 171.0, 152.5, 146.9, 128.8, 123.9, 98.8, 61.1, 55.9, 47.1, 40.4, 37.4, 32.9, 31.6, 13.8 ppm; the enantiomeric excess was determined by HPLC with an AD-H column (*n*-hexane: *i*-PrOH = 90:10), 1.0 mL/min; major enantiomer  $t_{\text{R}} = 20.2$  min, minor enantiomer  $t_{\text{R}} = 25.2$  min. HRMS (ESI) :  $[\text{M}]$  calcd for  $[\text{C}_{18}\text{H}_{19}\text{NO}_6\text{S}]$ : 377.0933, found: 377.0940.

## References

1. Ibrahim, I.; Cordova, A. *Chem. Commun.* **2006**, 1760-1762.
2. Hayashi, Y.; Gotoh, H.; Hayashi, T.; Shoji, M. *Angew. Chem. Int. Ed.* **2005**, *44*, 4212-4215.

3. Mathre, D.; Jones, T.; Xavier, L.; Blacklock, T.; Reamer, R.; Mohan, J.; Jones, E.; Turner, T.; Hoogsteen, K.; Baum, M.; Grabowski, E. *J. Org. Chem.* **1991**, *56*, 751-762.
4. Battistuzzi, G.; Cacchi, S.; Fabrizi, G. *Org. Lett.* **2003**, *5*, 777-780.
5. Stoll, M.; Flament, I. *Helv. Chim. Acta* **1969**, *52*, 1996-2003.
6. Beagley, B.; Larsen, D.; Pritchard, R.; Stoodley, R.; Whiting, A. *J. Chem. Soc., Perkin Trans. 1* **1989**, *6*, 1127-1137.
7. Johnson, J.; Evanoff, D.; Savard, M.; Lange, G.; Ramadhar, T.; Assoud, A.; Taylor, N.; Dmitrienko, G. *J. Org. Chem.* **2008**, *73*, 6970-6982.

<sup>1</sup>H, <sup>13</sup>C NMR spectra and HPLC chromatograms

11.752  
6.793  
6.613  
5.056  
3.750  
3.731  
3.708  
2.594  
2.578  
2.522  
2.515  
2.466  
2.461  
1.987  
1.967  
1.948  
1.929  
1.910

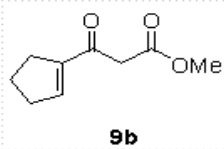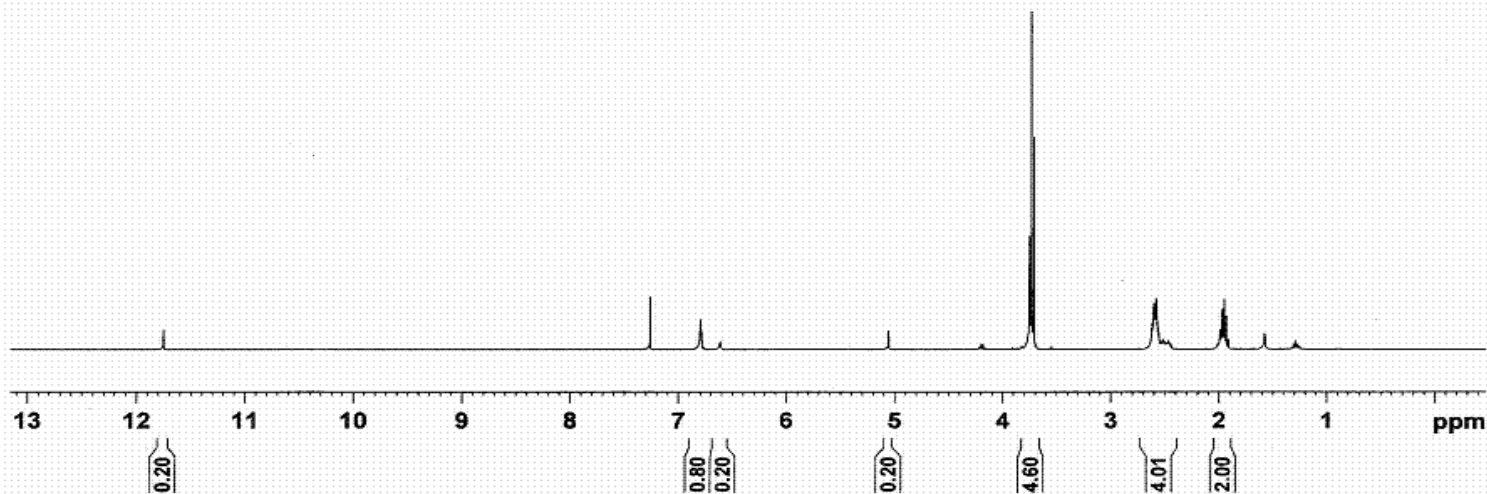

190.33  
173.45  
168.49  
168.14  
146.13  
145.47  
138.15  
137.61  
88.46  
52.39  
51.27  
46.11  
34.24  
33.58  
31.03  
30.68  
23.21  
22.86

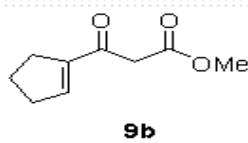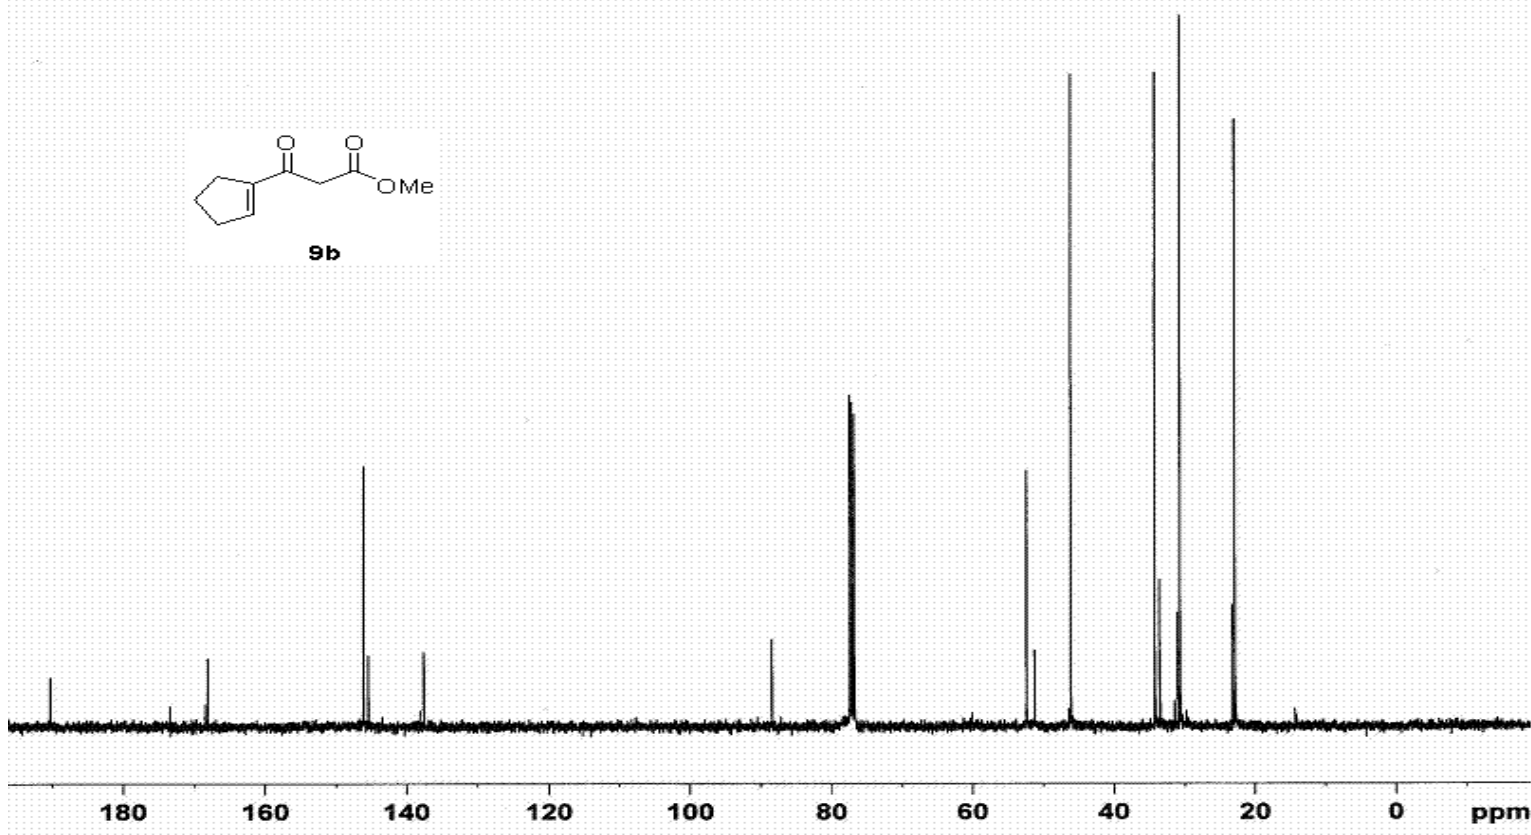

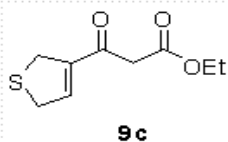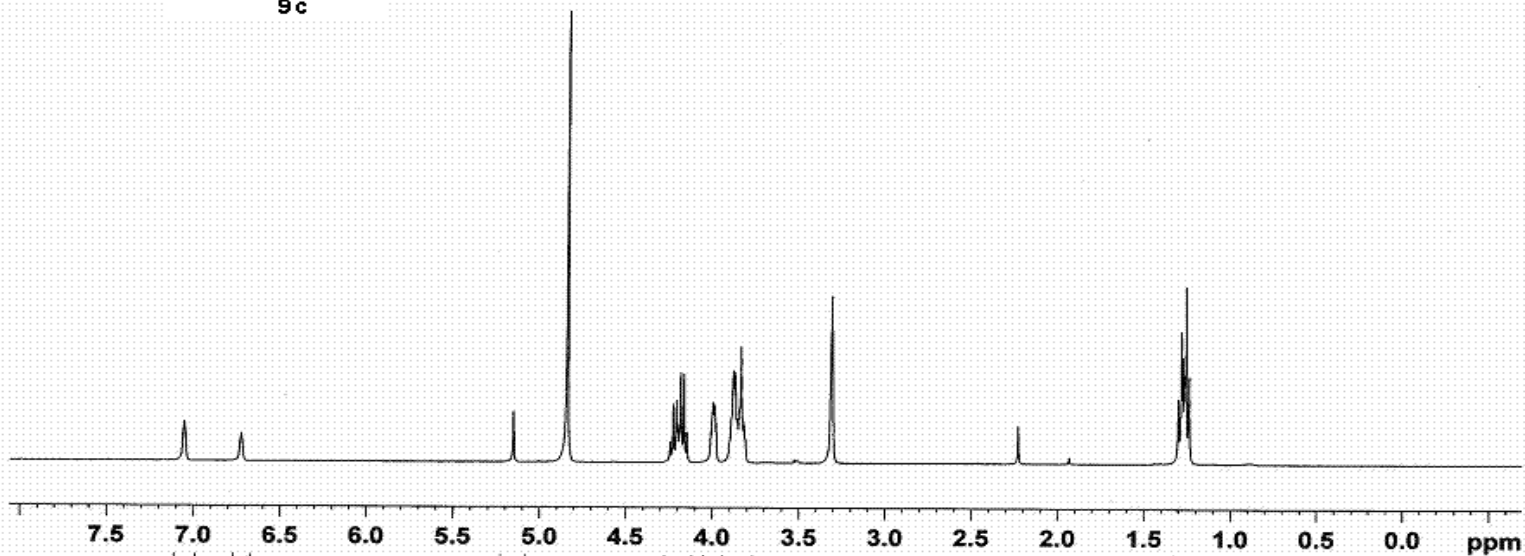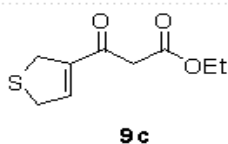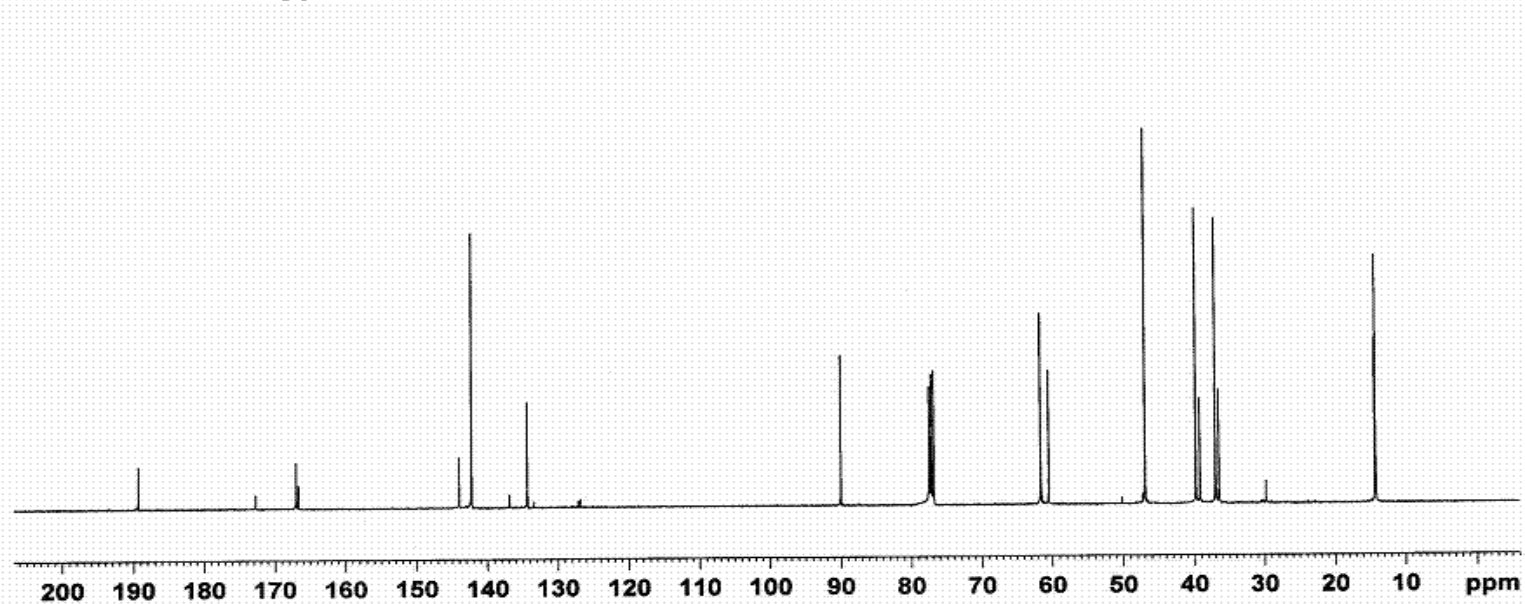

12.538

9.381  
9.377

8.141  
8.119

7.271  
7.260  
7.250

4.450  
4.441  
4.090  
4.072  
4.028  
4.010  
3.015  
2.995  
2.971  
2.951  
2.587  
2.329  
2.071  
2.051  
1.802  
1.636  
1.547  
1.348  
1.328  
1.318  
1.084  
1.066  
1.049

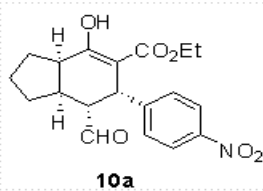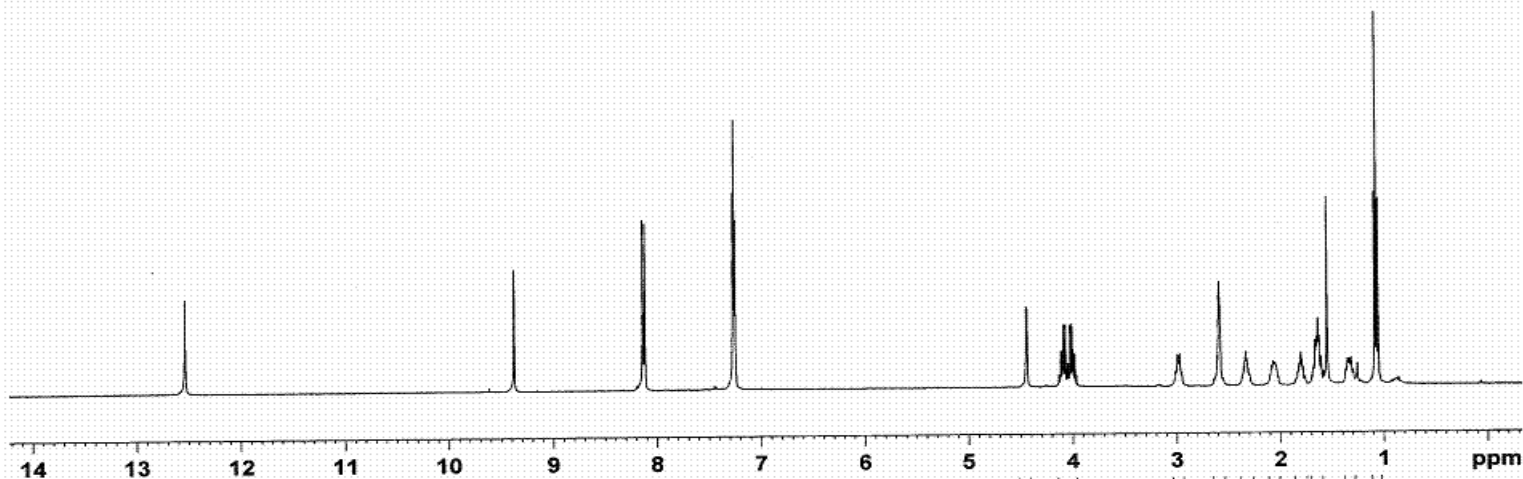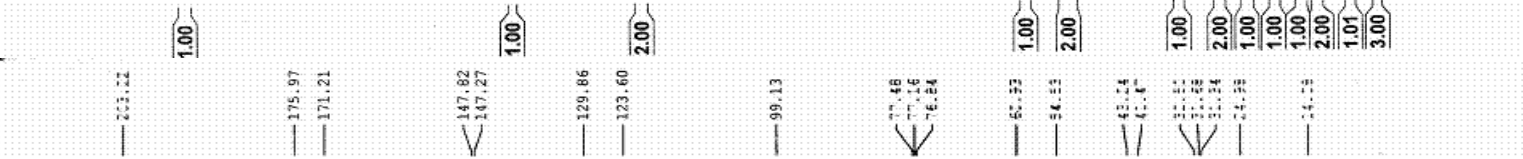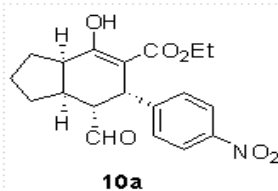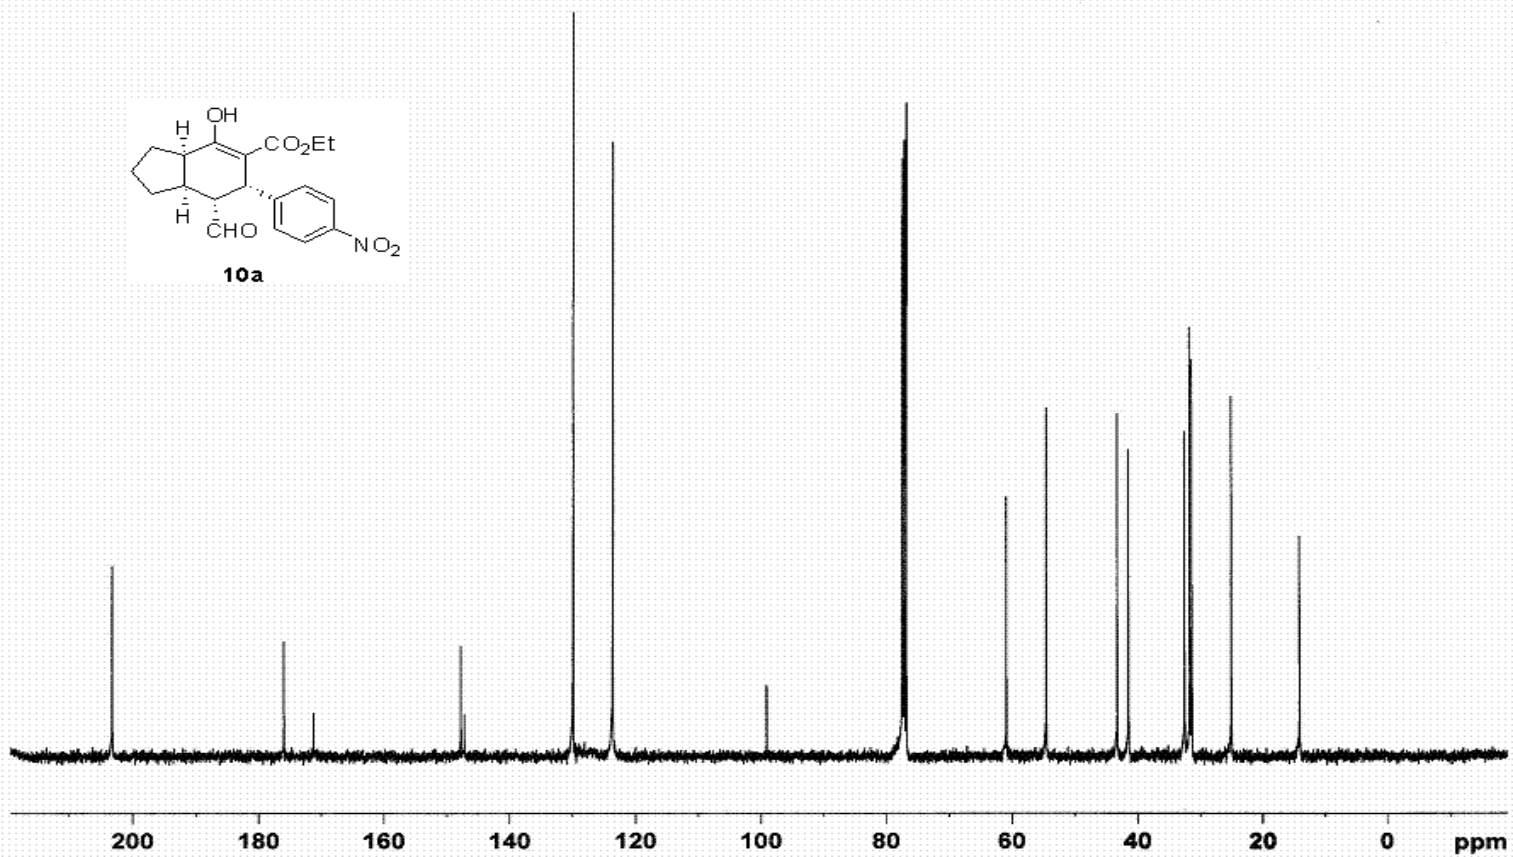



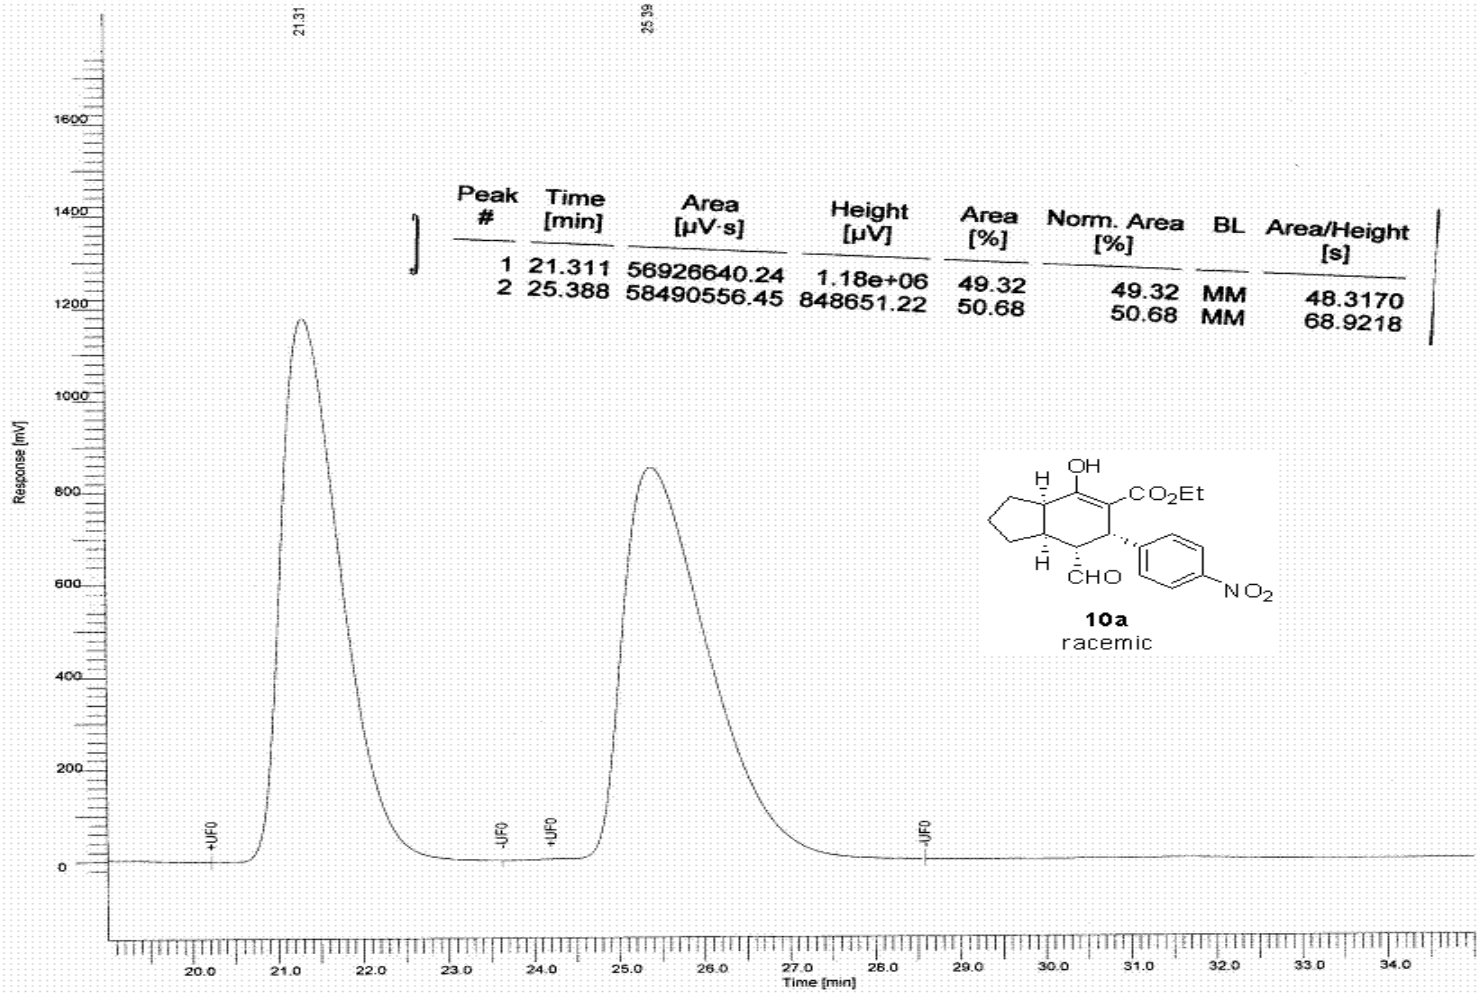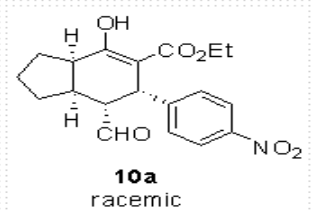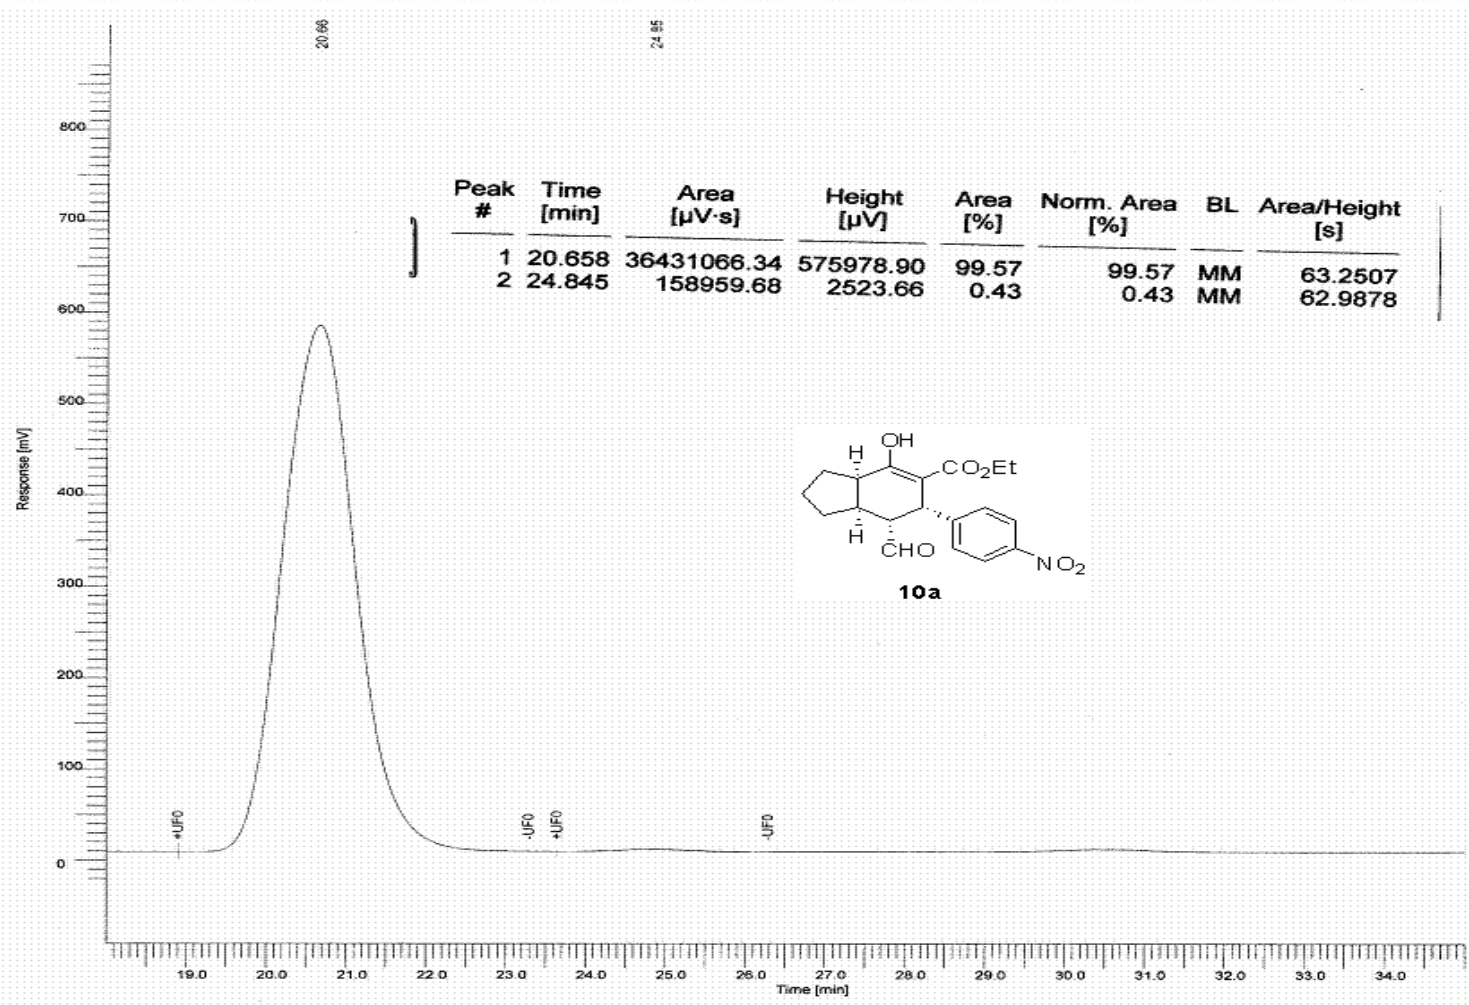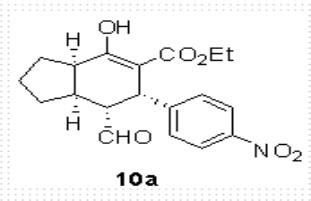

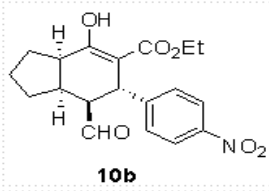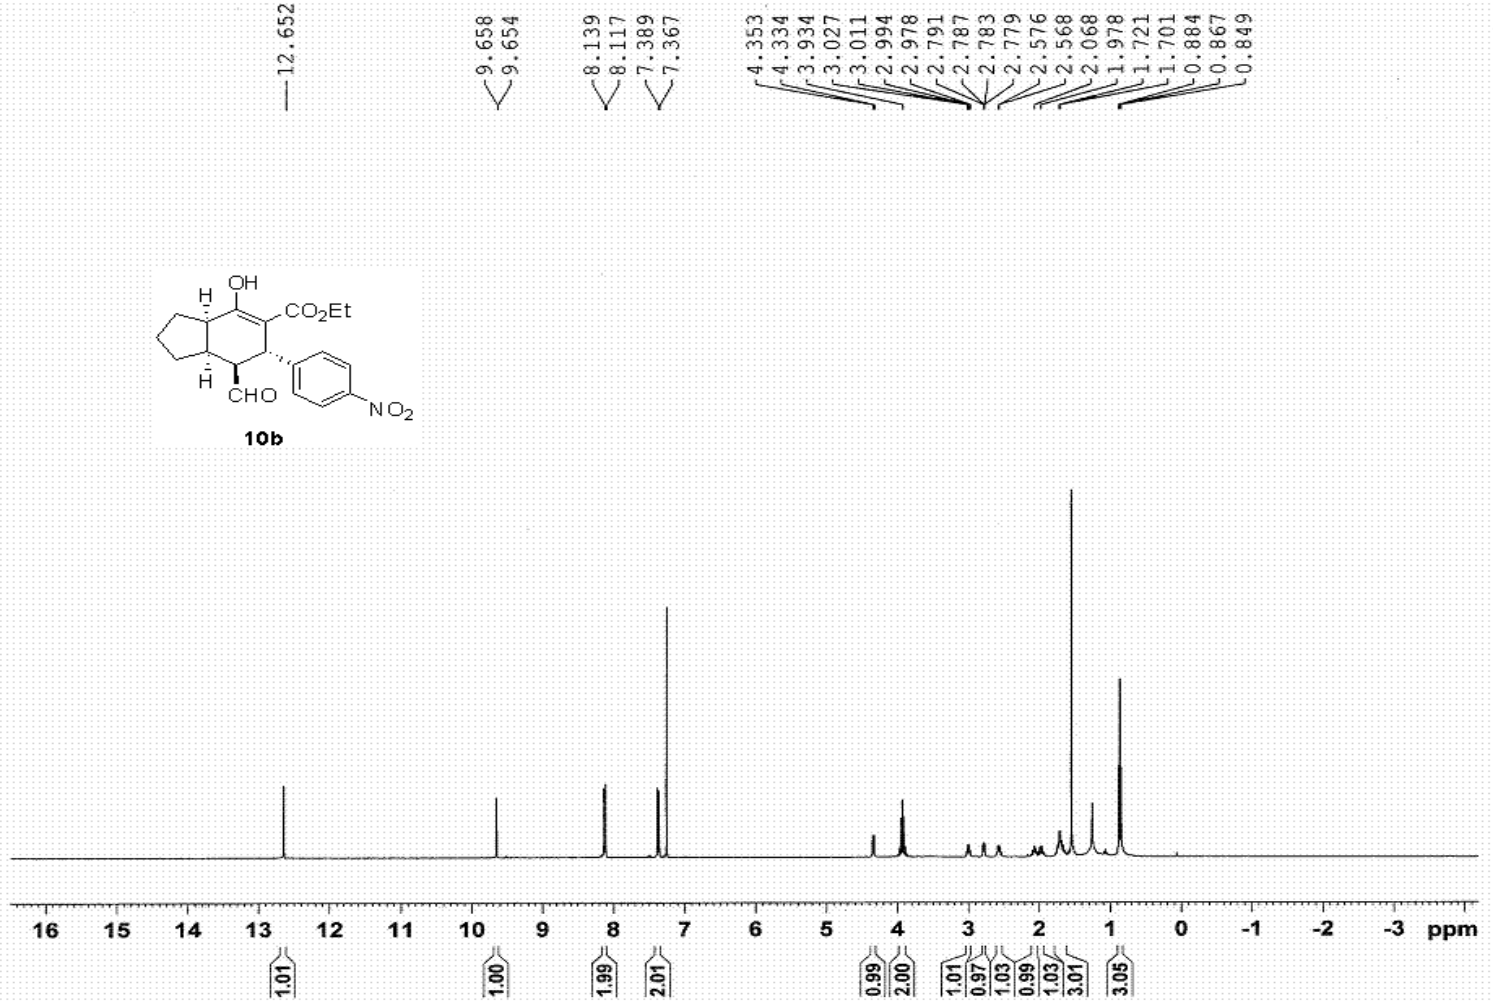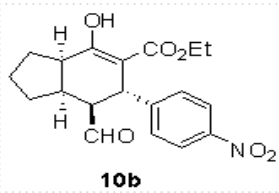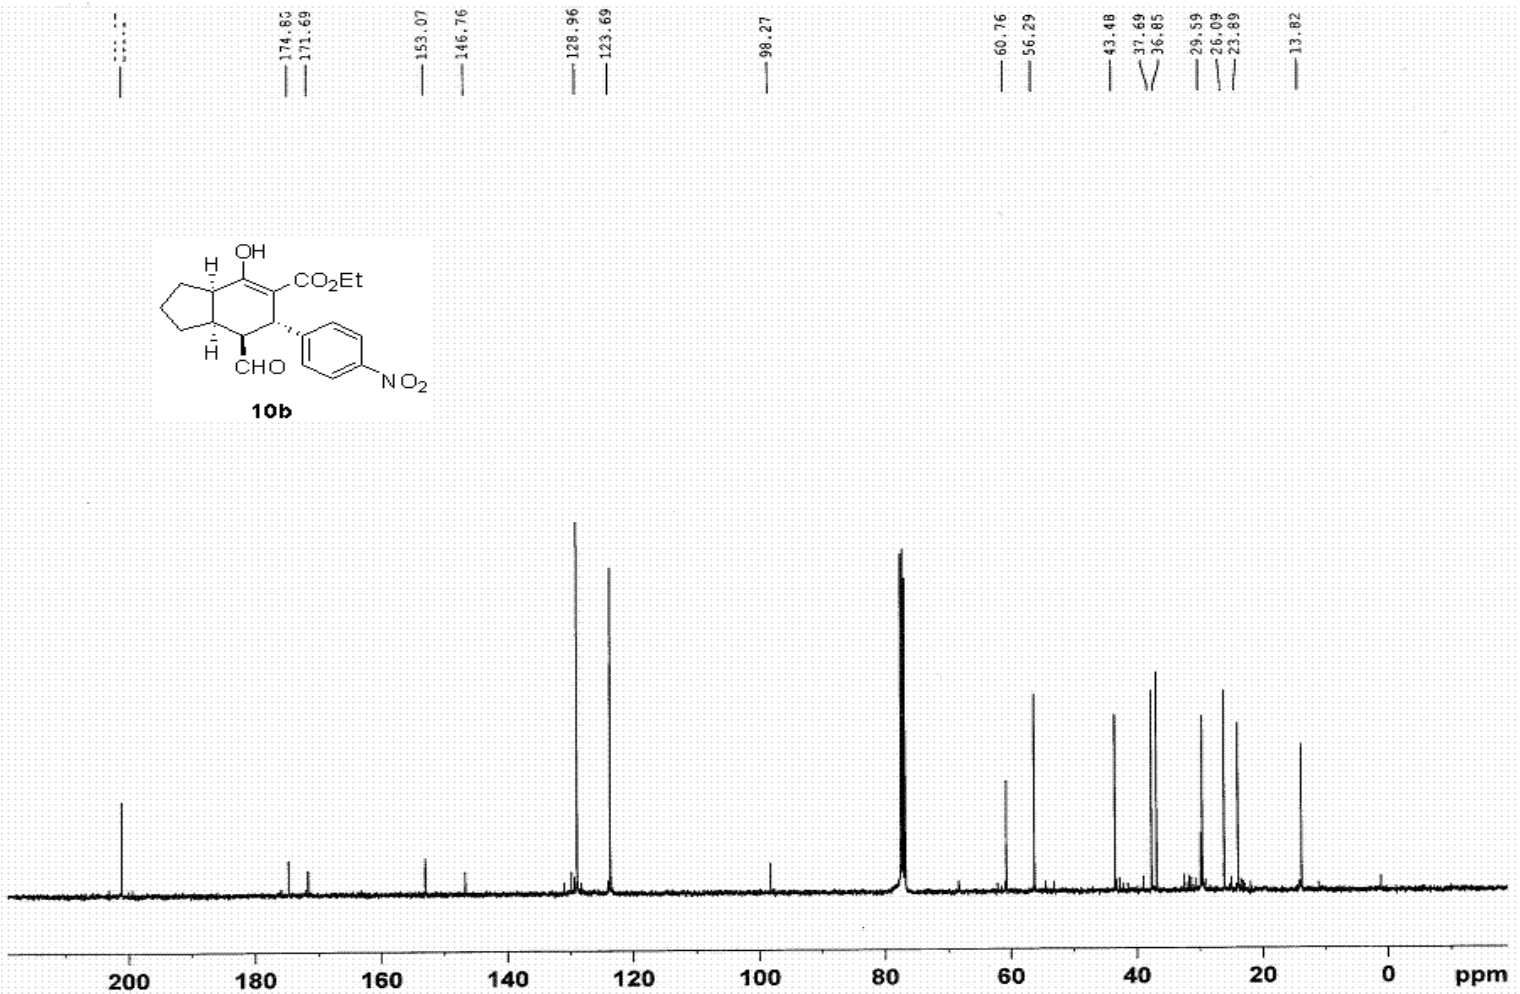

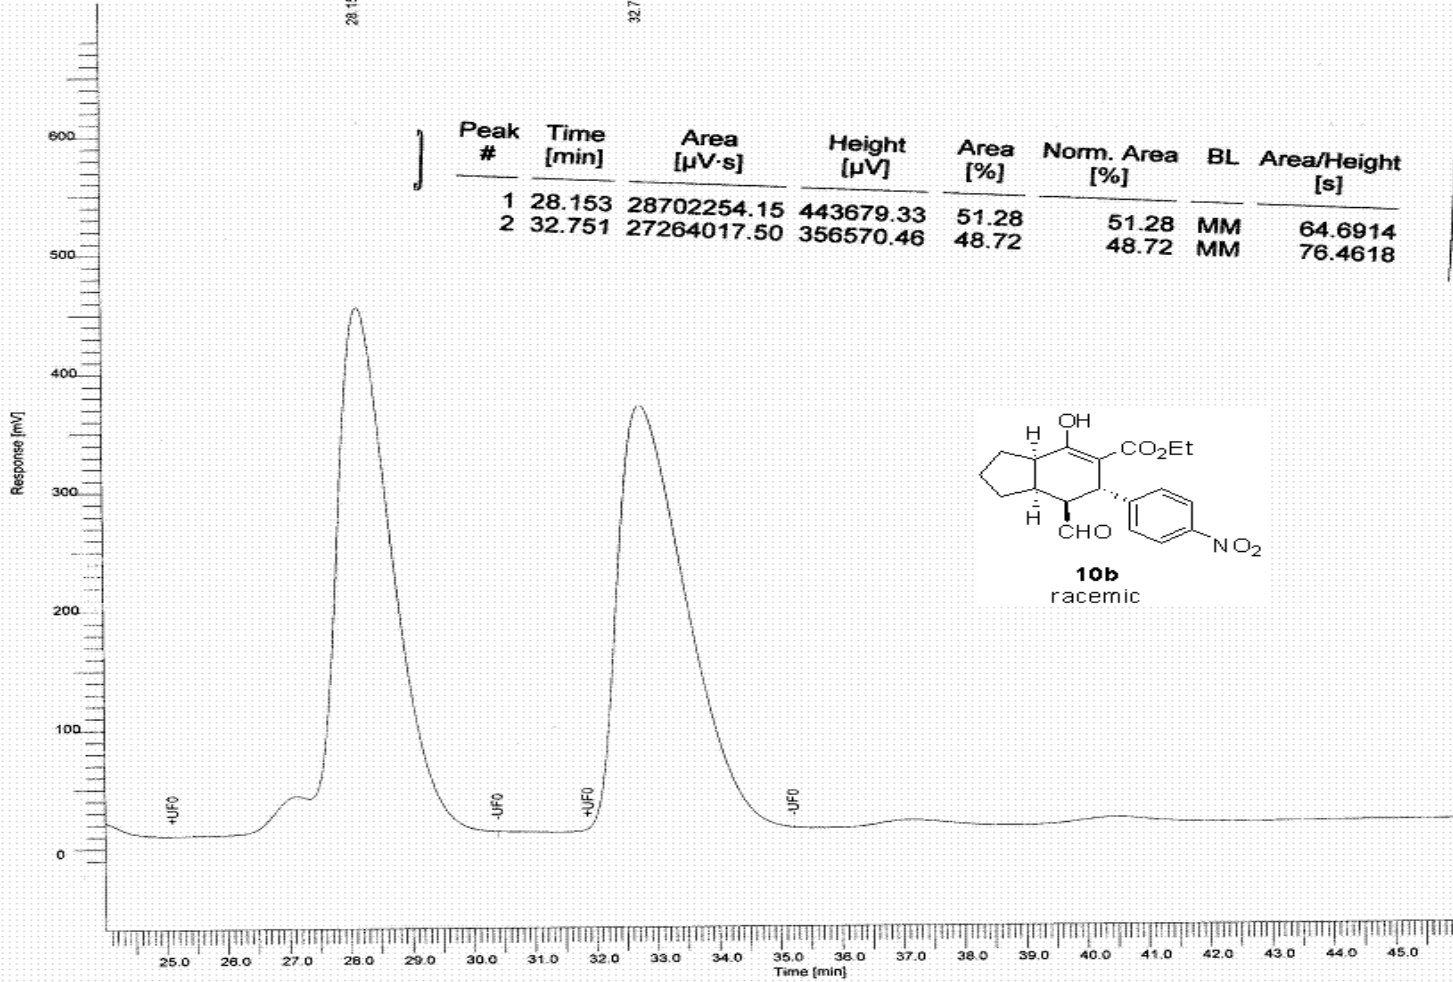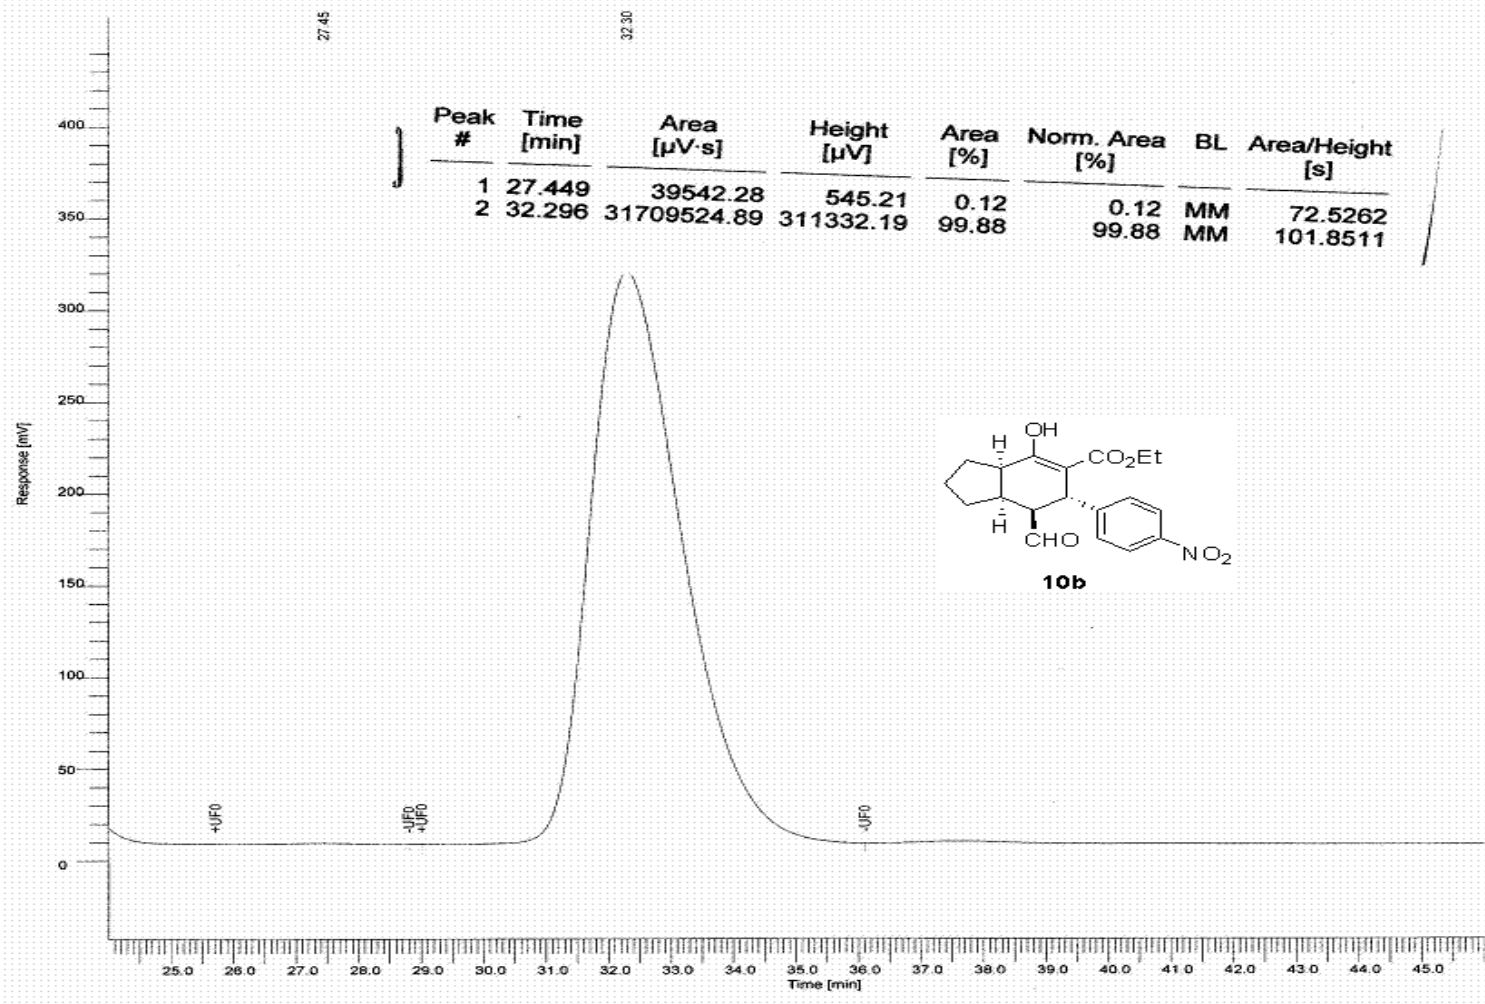

—12.586

<9.662  
<9.659

<8.143  
<8.122  
<7.325  
<7.304

4.362  
4.347  
3.963  
3.945  
2.806  
2.787  
2.583  
2.296  
2.276  
1.743  
1.735  
1.725  
1.704  
1.619  
1.518  
1.291  
1.275  
1.248  
0.879  
0.861  
0.843

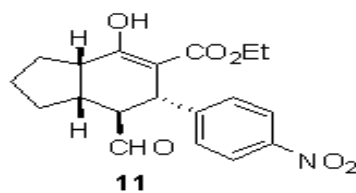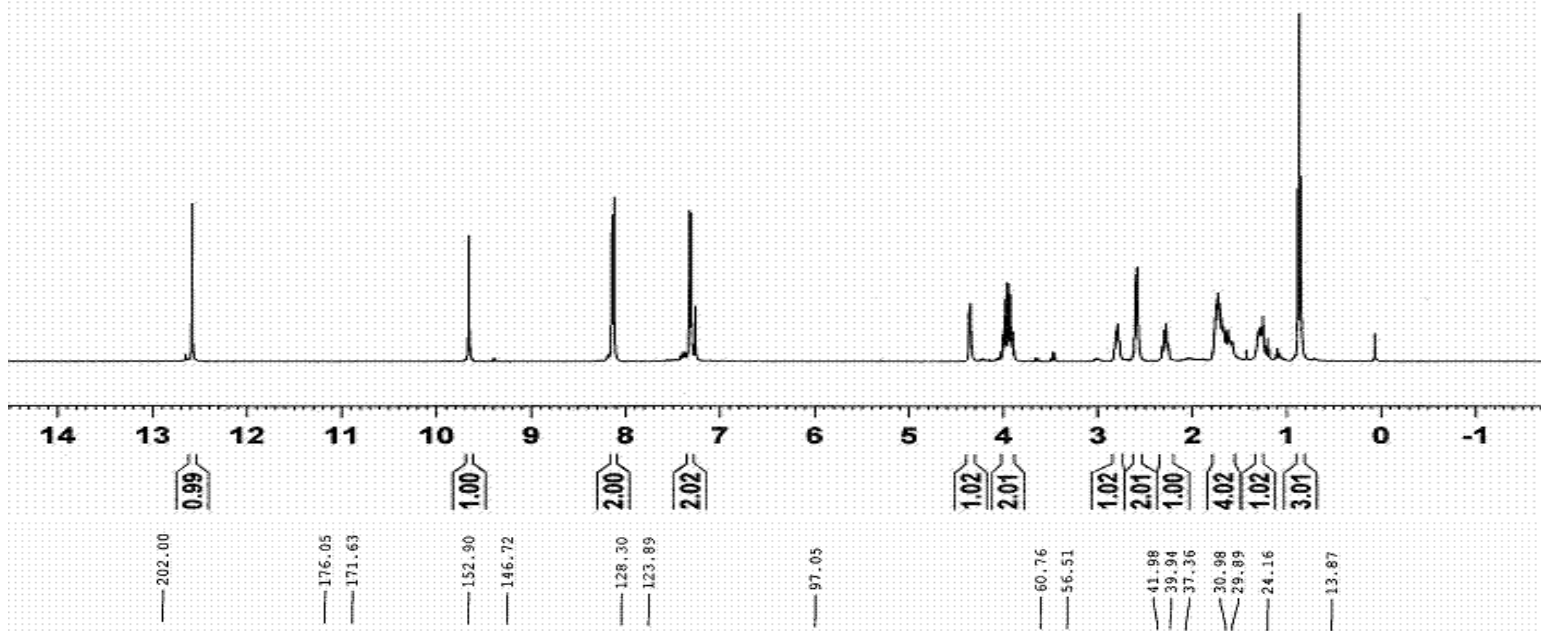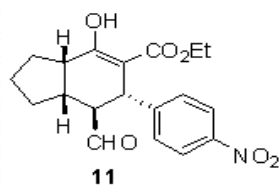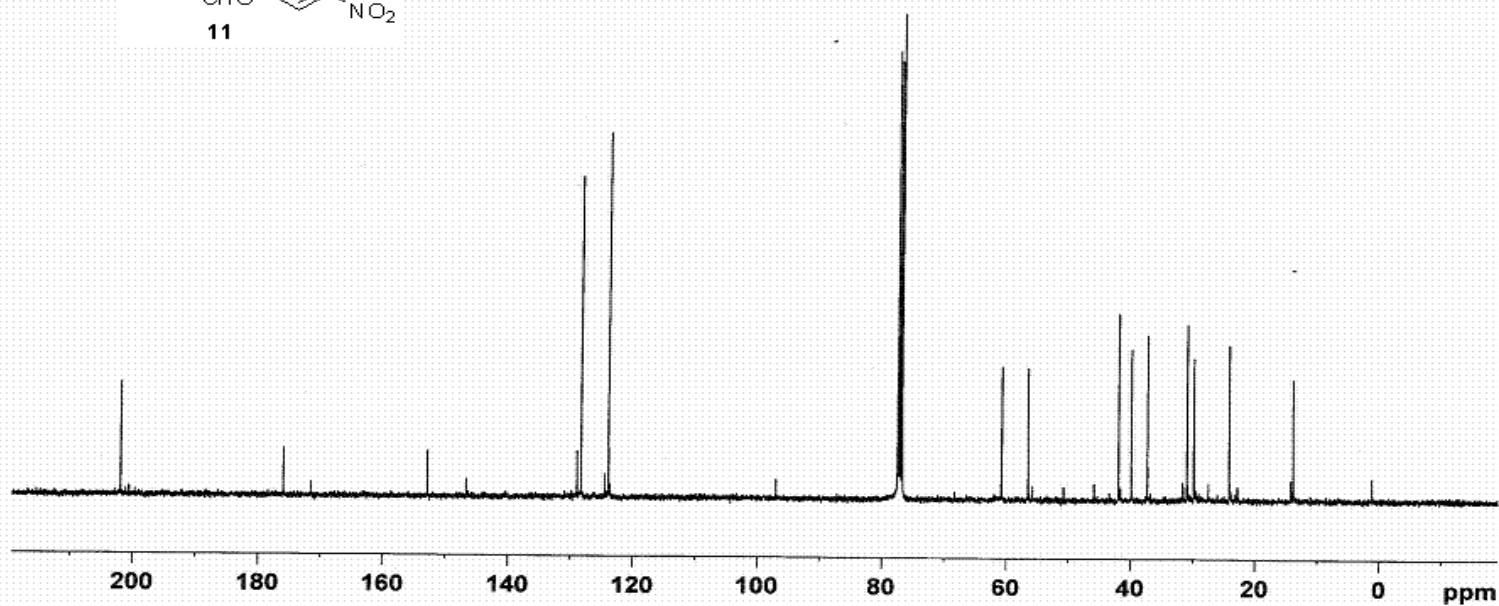

21.94

63.45

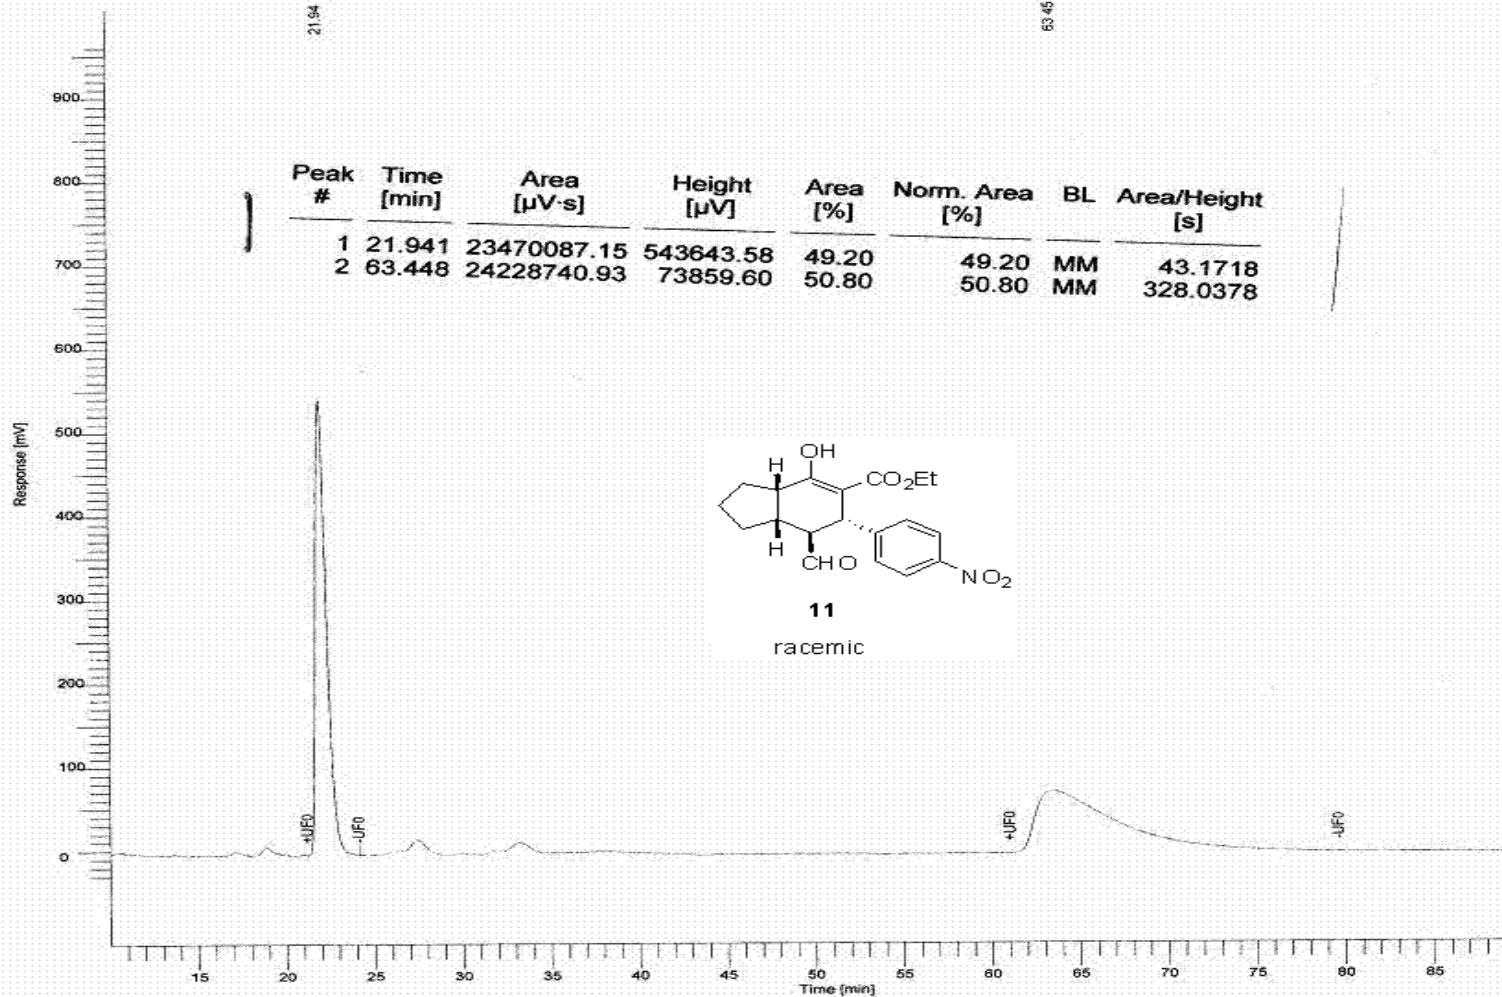

22.51

66.49

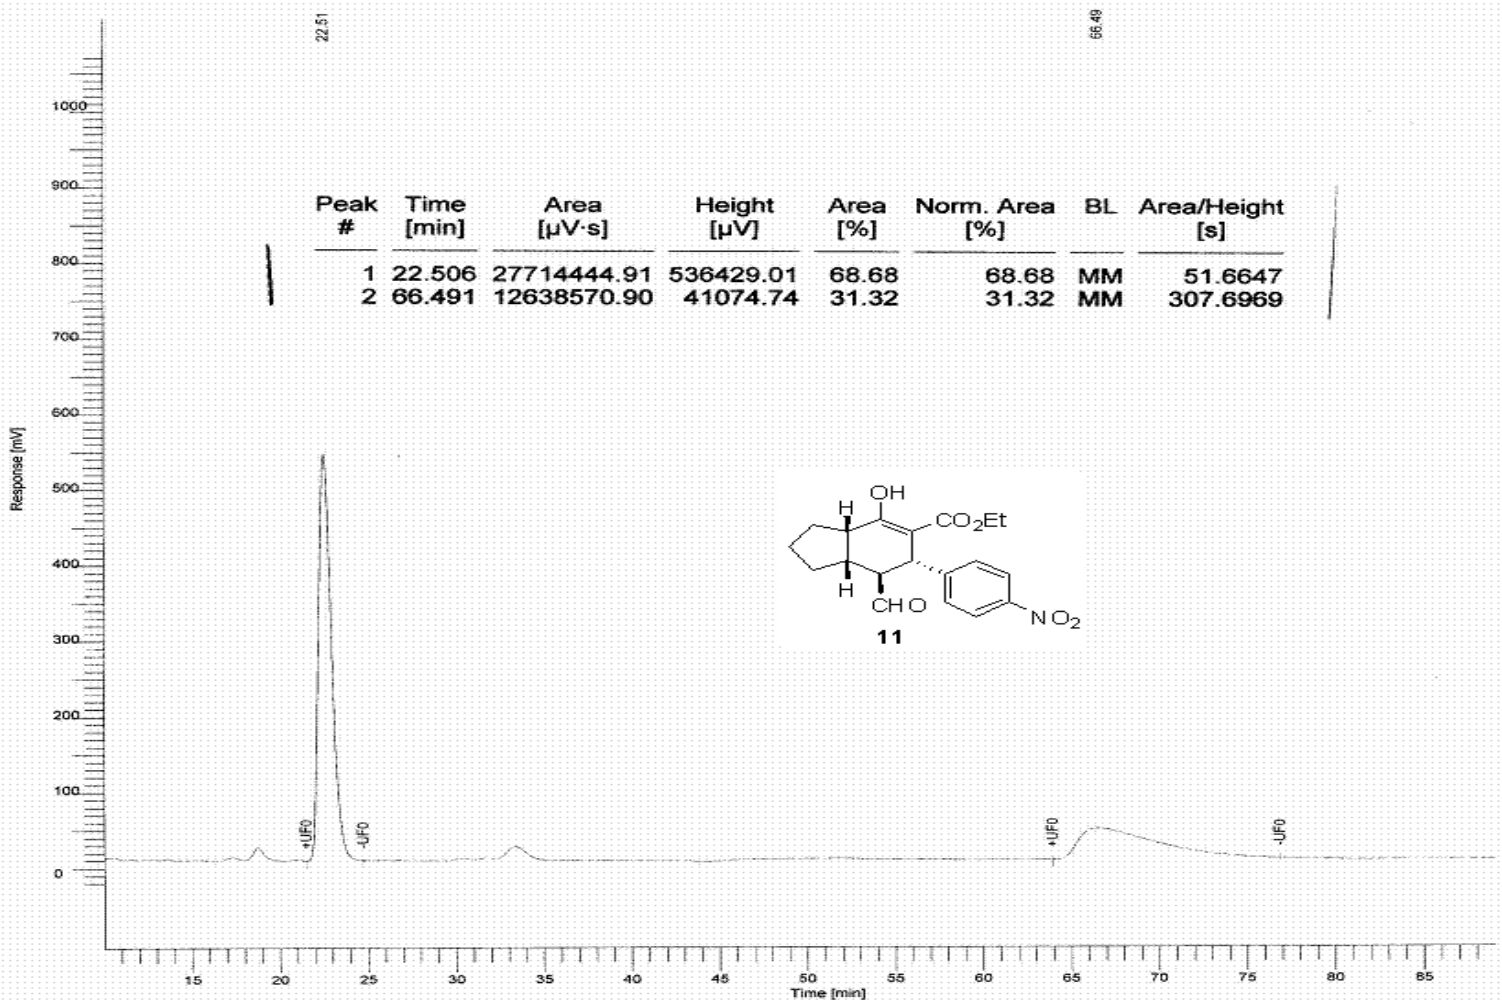

12.507

9.328  
9.321

7.239  
7.218  
7.018  
6.997

4.311  
4.299  
4.072  
4.027  
2.967  
2.946  
2.921  
2.900  
2.611  
2.497  
2.490  
2.485  
2.477  
2.466  
2.458  
2.453  
2.446  
2.301  
2.293  
2.032  
2.011  
1.777  
1.609  
1.286  
1.099  
1.081  
1.063

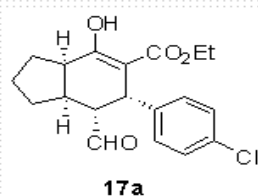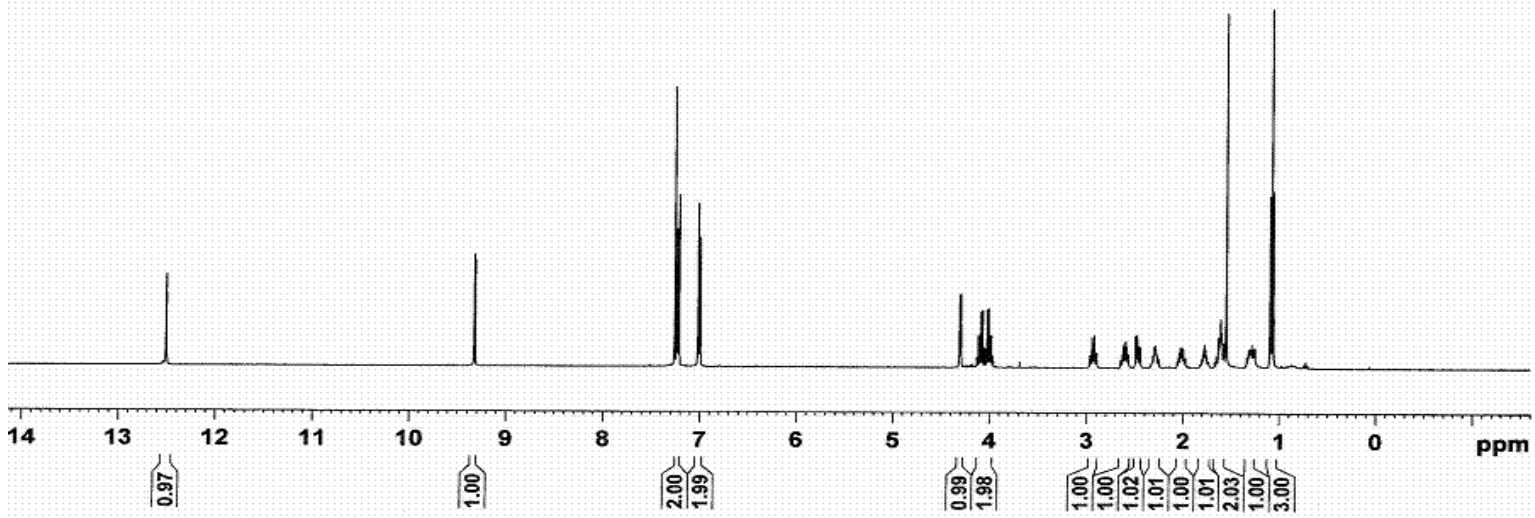

204.26

175.45  
171.52

138.38  
132.99  
130.24  
128.58

99.69

60.77

54.59

43.16

41.05

32.40

31.57

31.33

25.00

14.09

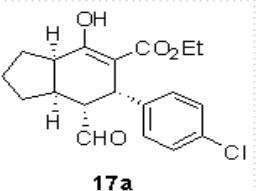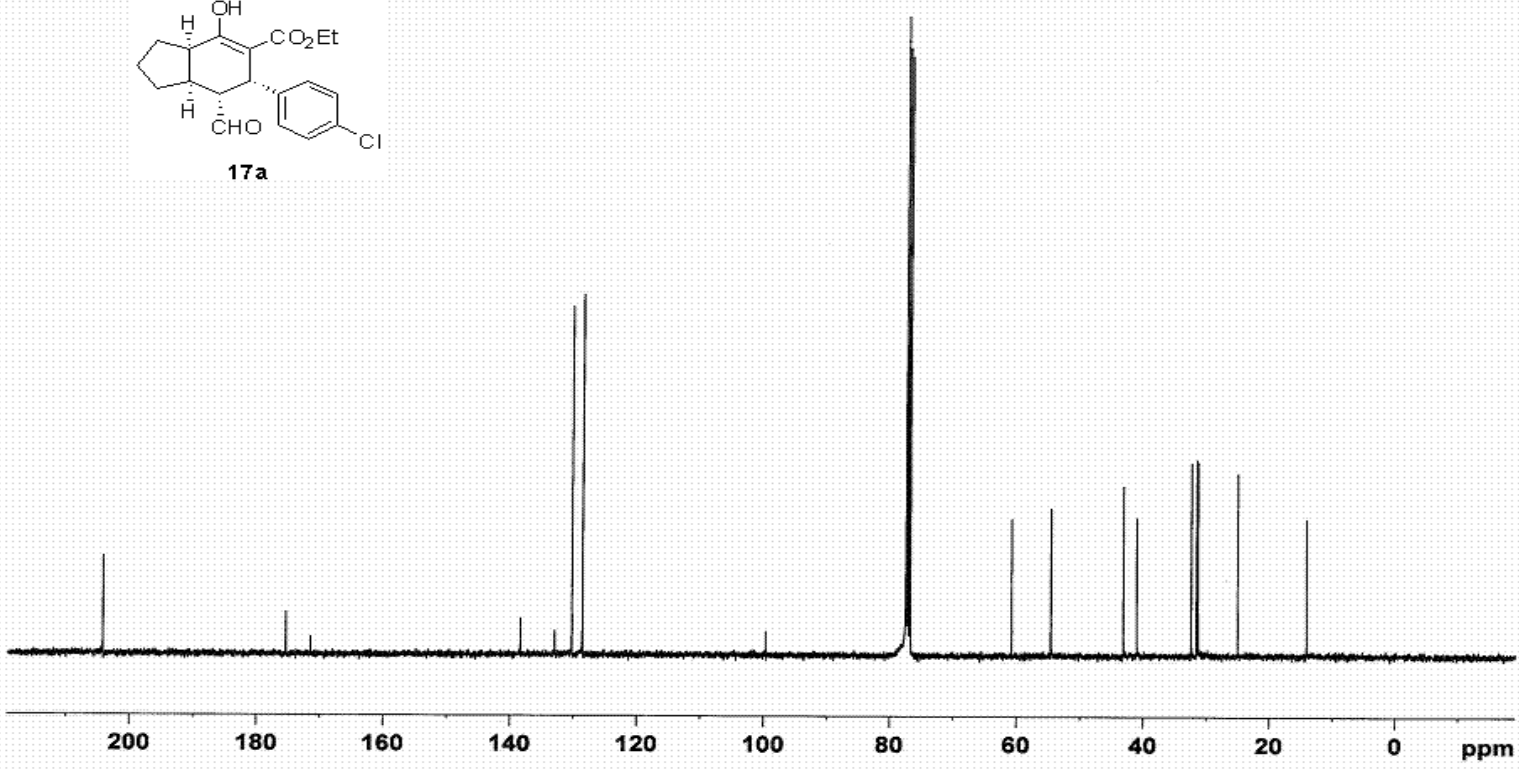

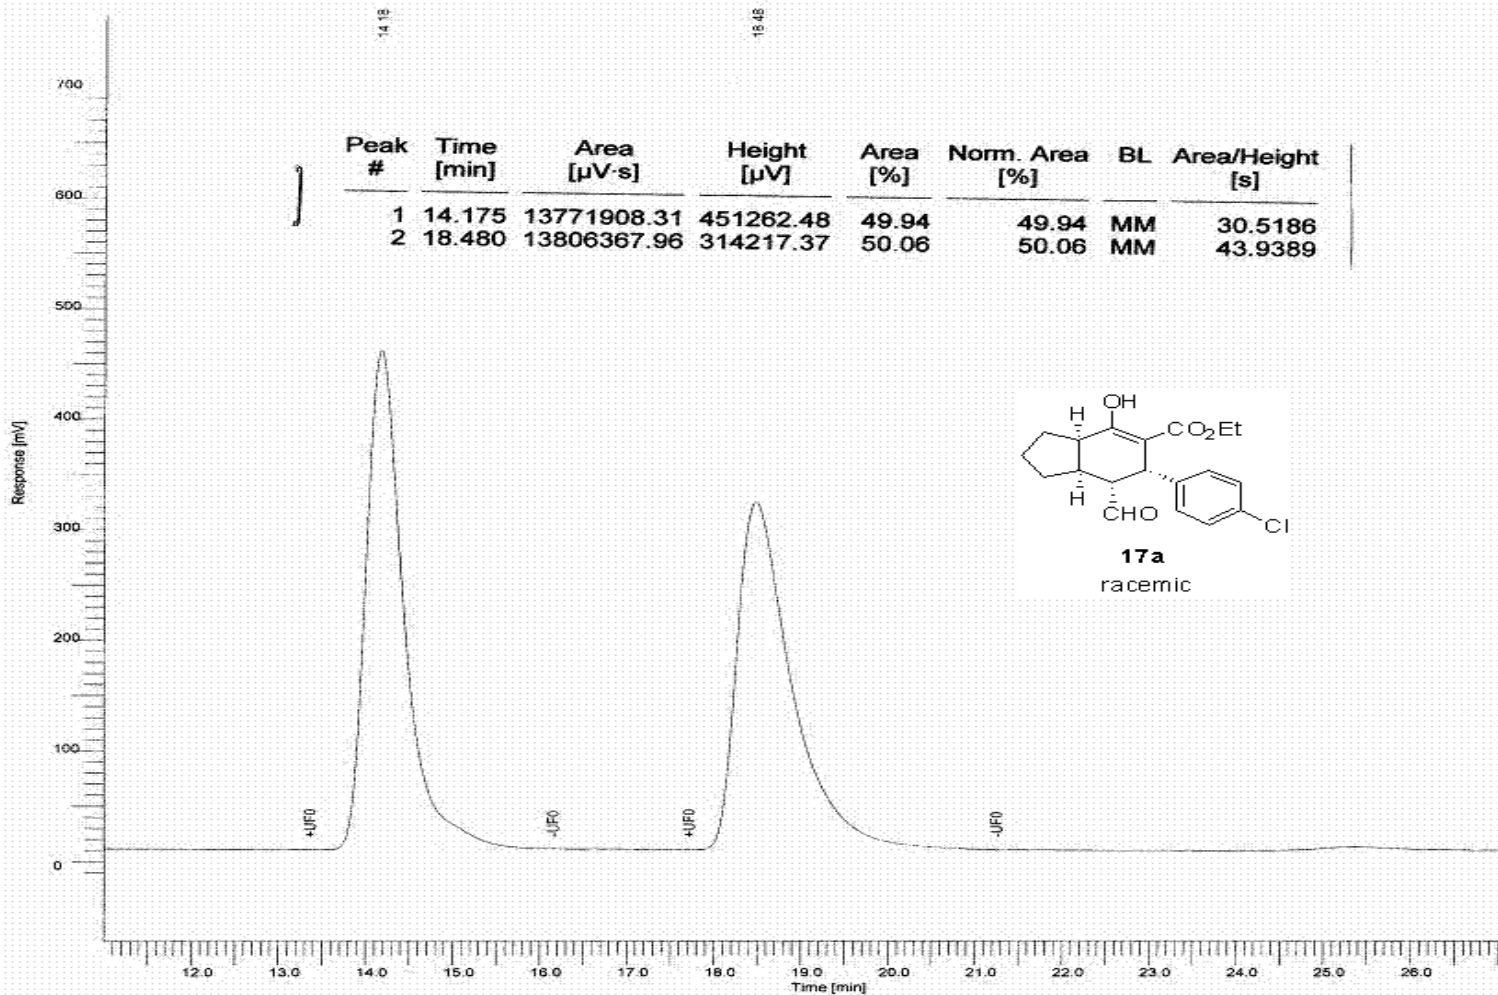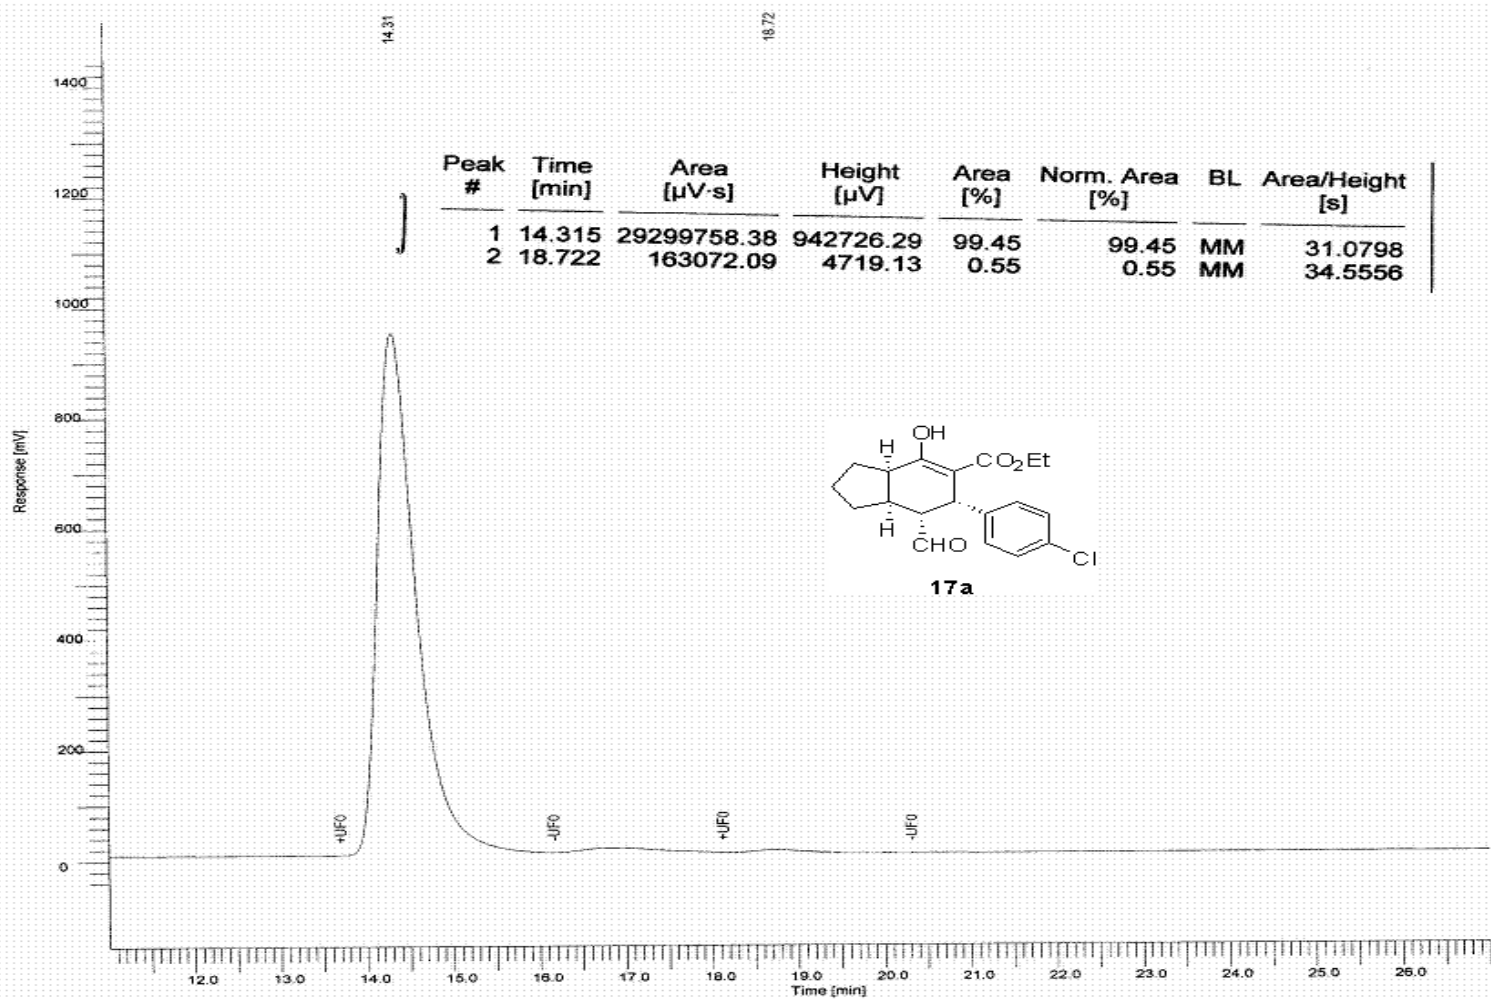

12.592  
 9.682  
 9.677  
 7.241  
 7.220  
 7.125  
 7.104  
 4.195  
 4.178  
 3.984  
 3.966  
 3.955  
 3.937  
 2.962  
 2.945  
 2.926  
 2.909  
 2.699  
 2.525  
 2.518  
 2.087  
 2.067  
 1.884  
 1.866  
 1.763  
 1.741  
 1.735  
 1.676  
 1.654  
 1.577  
 0.937  
 0.919  
 0.901

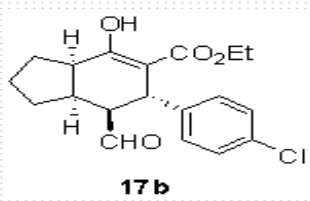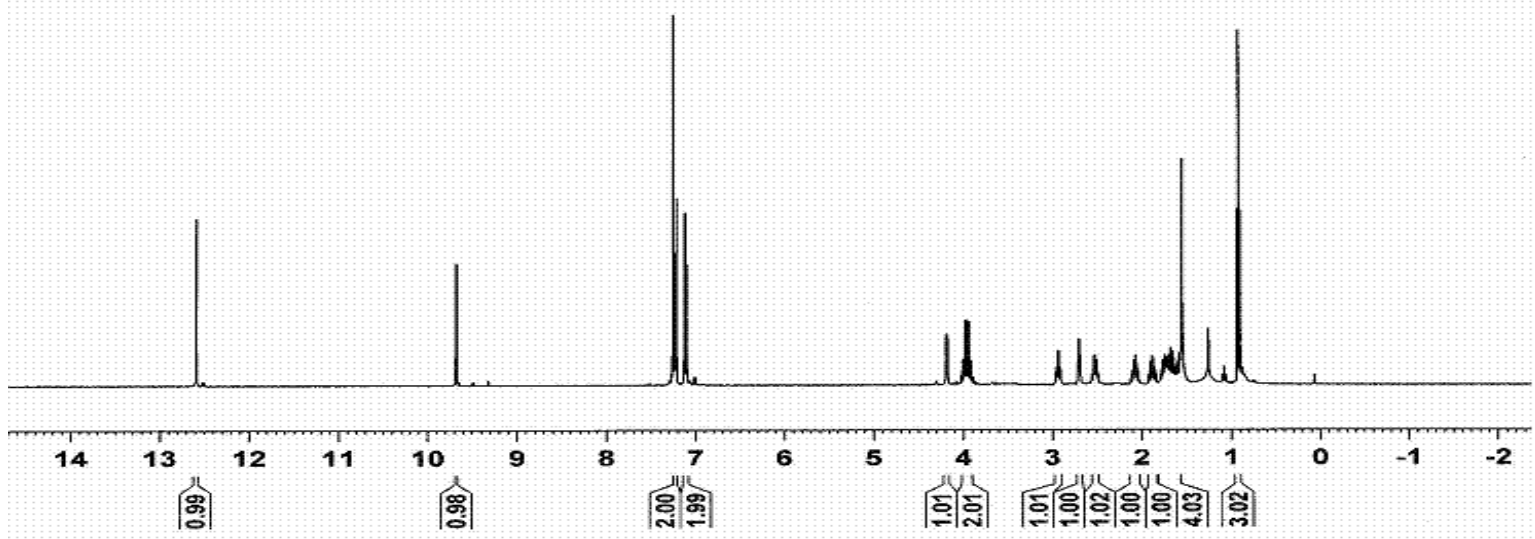

202.51  
 174.40  
 172.02  
 143.26  
 132.16  
 129.37  
 128.57  
 98.73  
 60.63  
 56.52  
 43.38  
 37.58  
 36.68  
 29.77  
 26.37  
 24.08  
 13.84

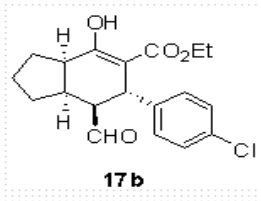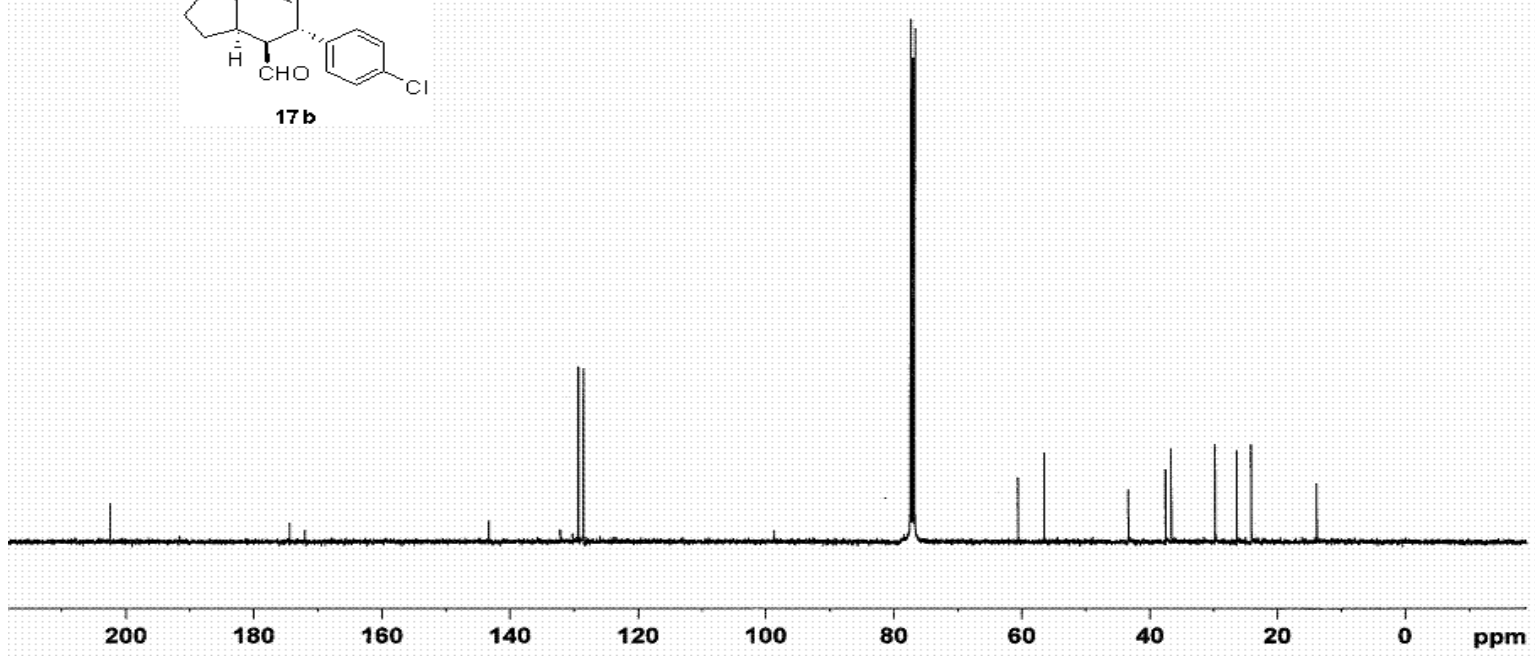



23.87

30.16

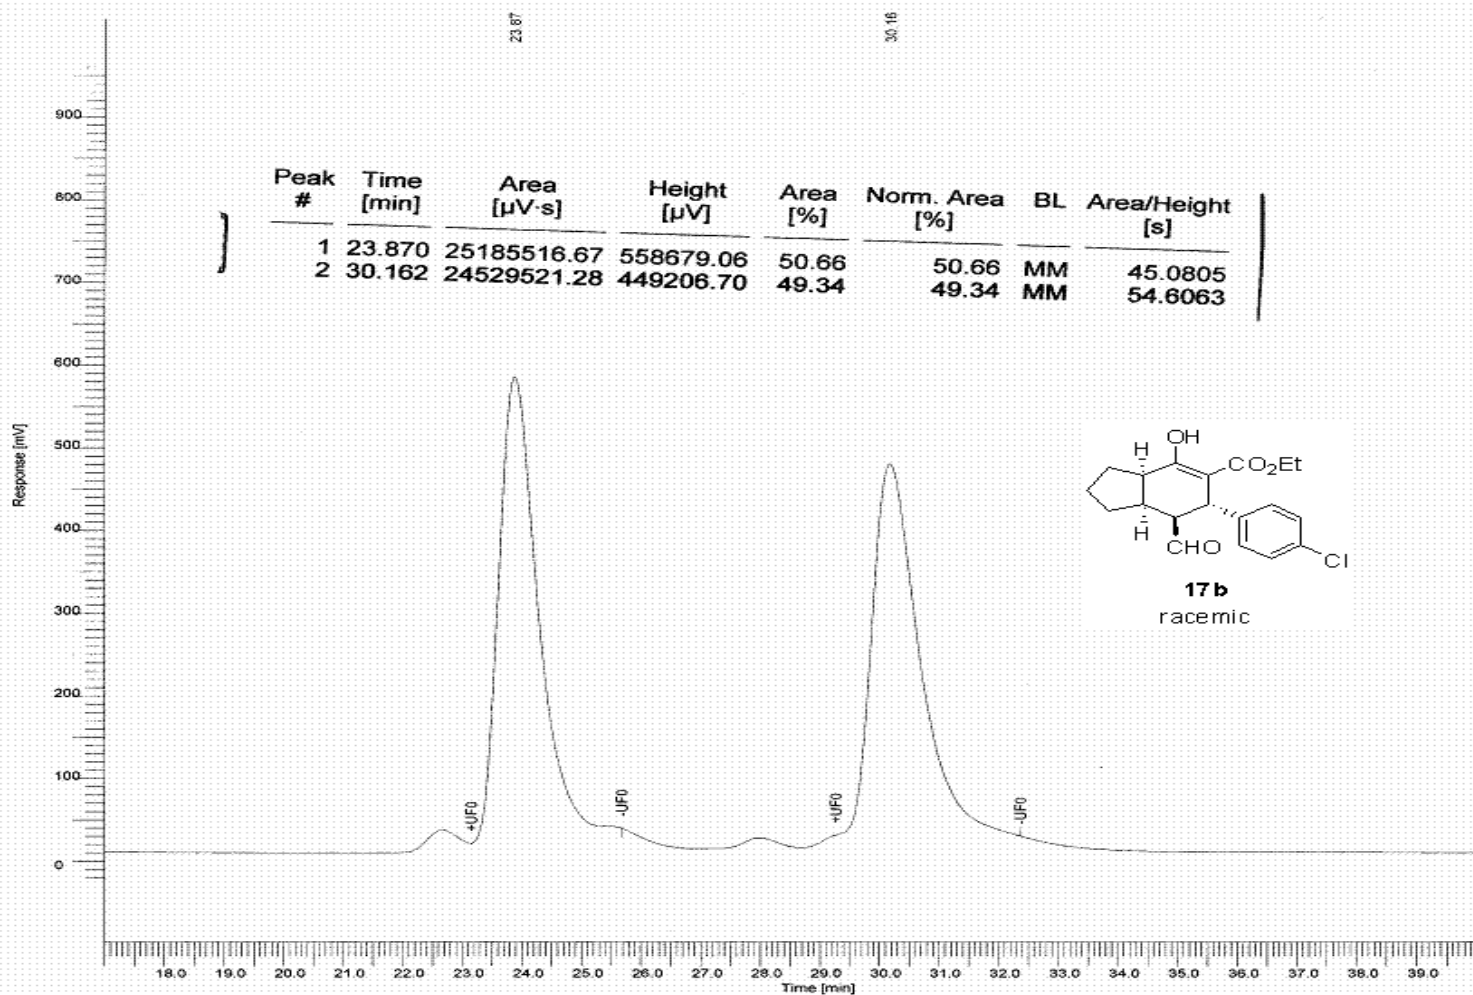

24.25

31.80

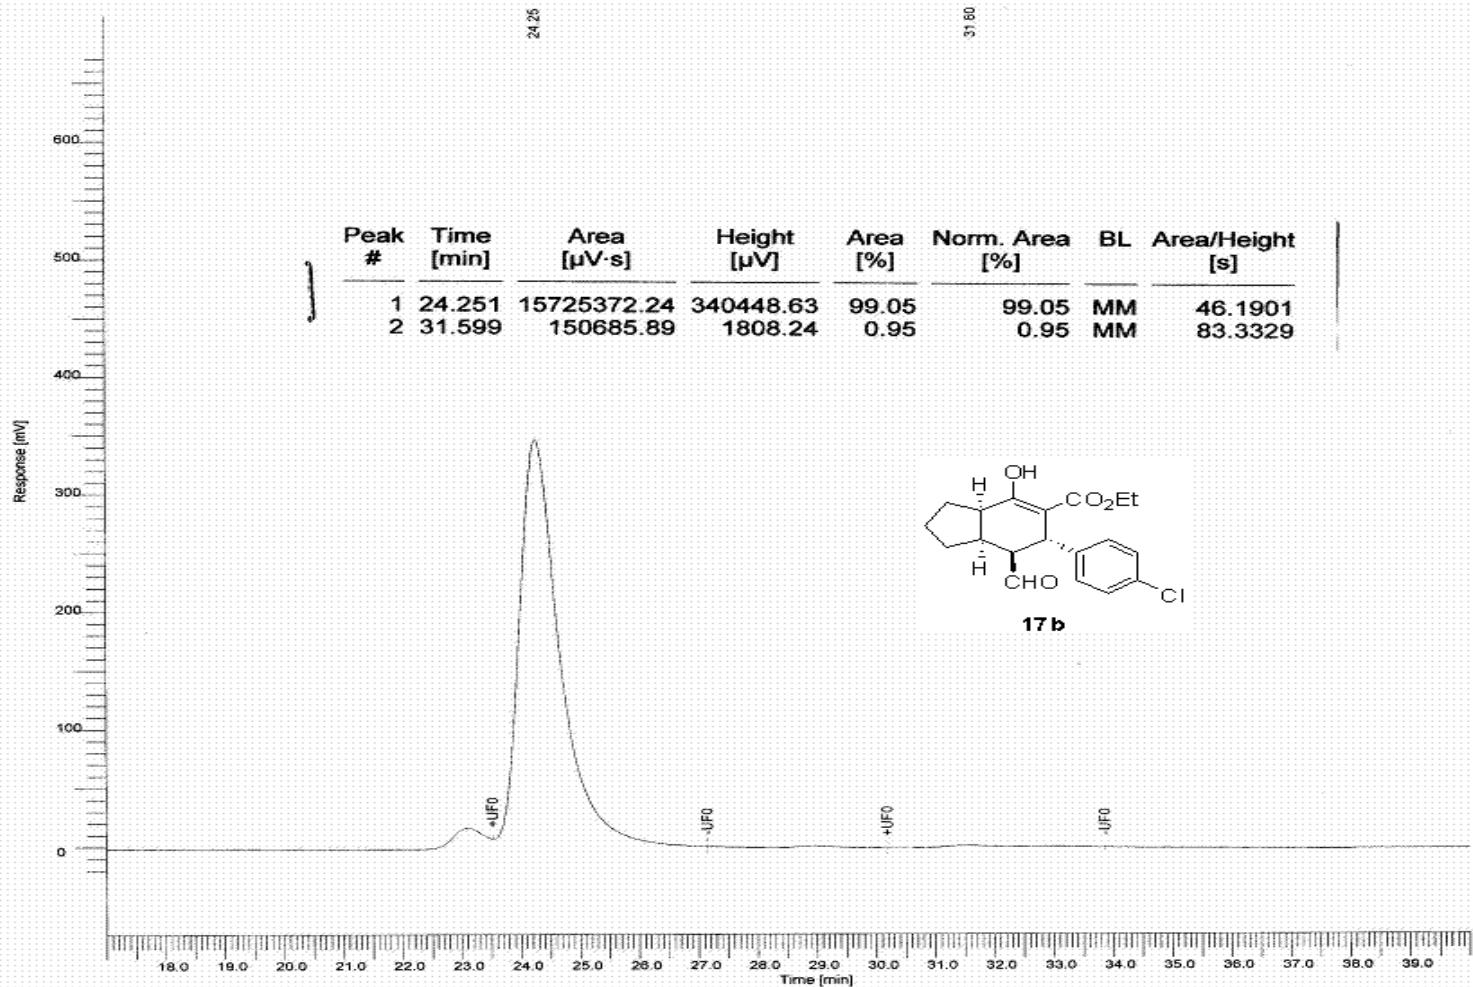

— 12.518

9.343  
9.336

7.481  
7.462  
7.403  
7.384  
7.365  
7.322  
7.285  
7.265

4.396  
4.384  
4.053  
4.036  
3.011  
2.990  
2.965  
2.944  
2.632  
2.611  
2.532  
2.519  
2.314  
2.059  
2.039  
1.789  
1.627  
1.316  
1.069  
1.052  
1.034

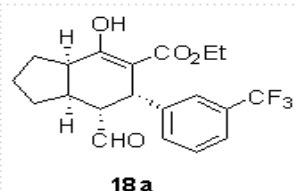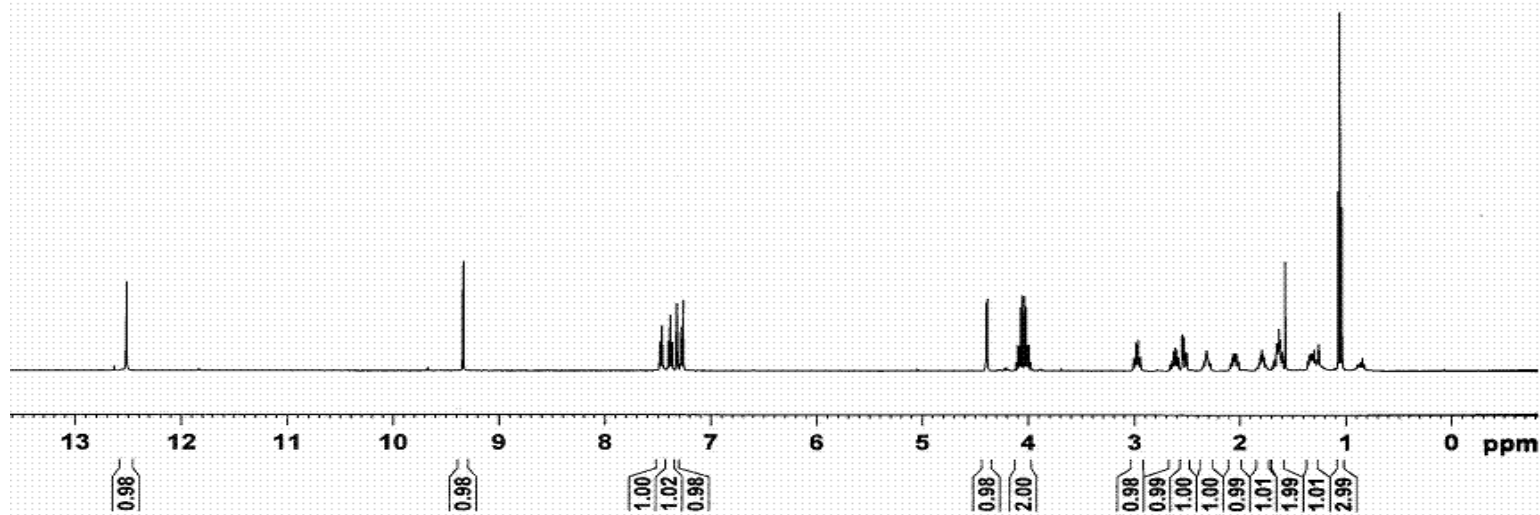

203.75

175.66  
171.40

141.17  
132.33  
131.01  
130.89  
128.90  
125.61  
124.13

99.49

60.82  
54.56

43.16  
41.48  
32.47  
31.69  
31.36  
25.01

13.97

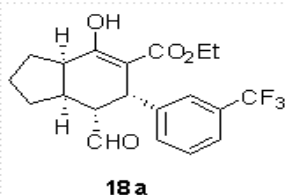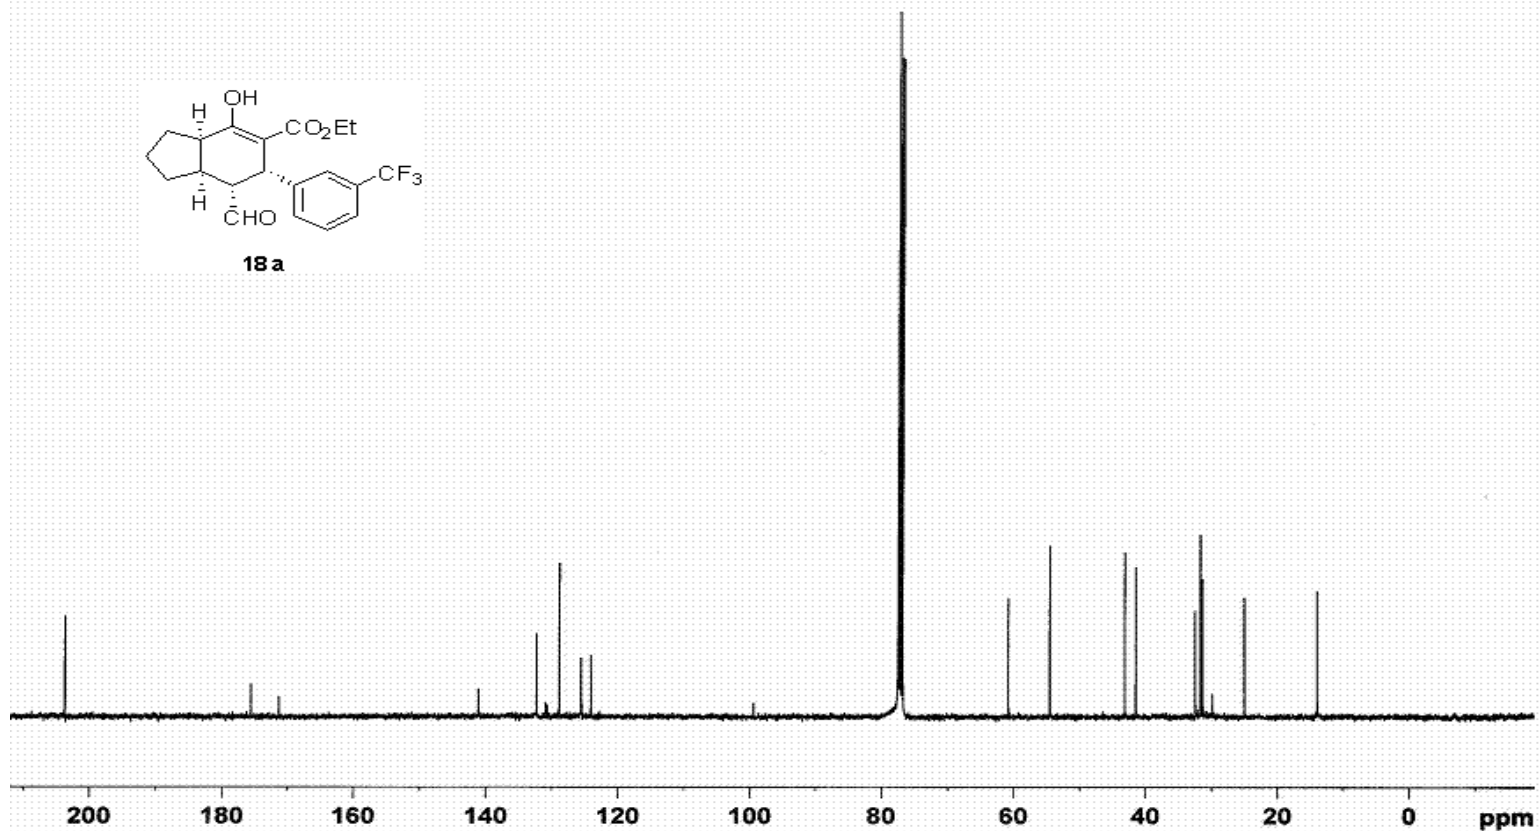

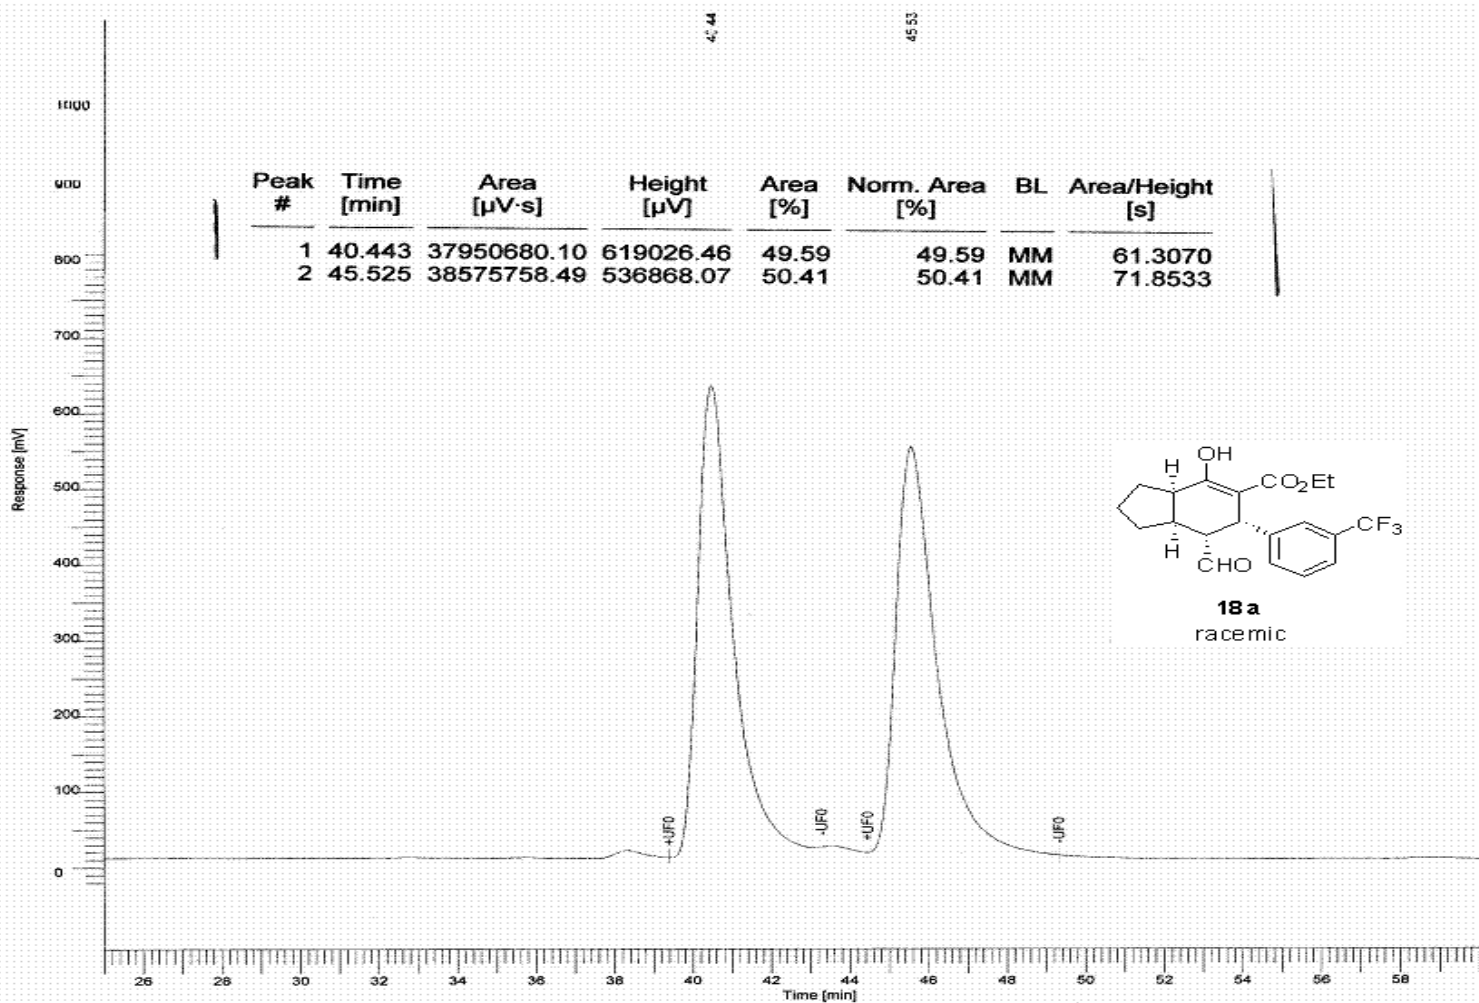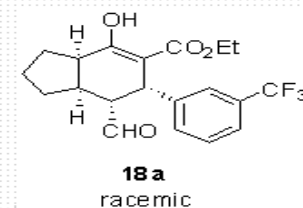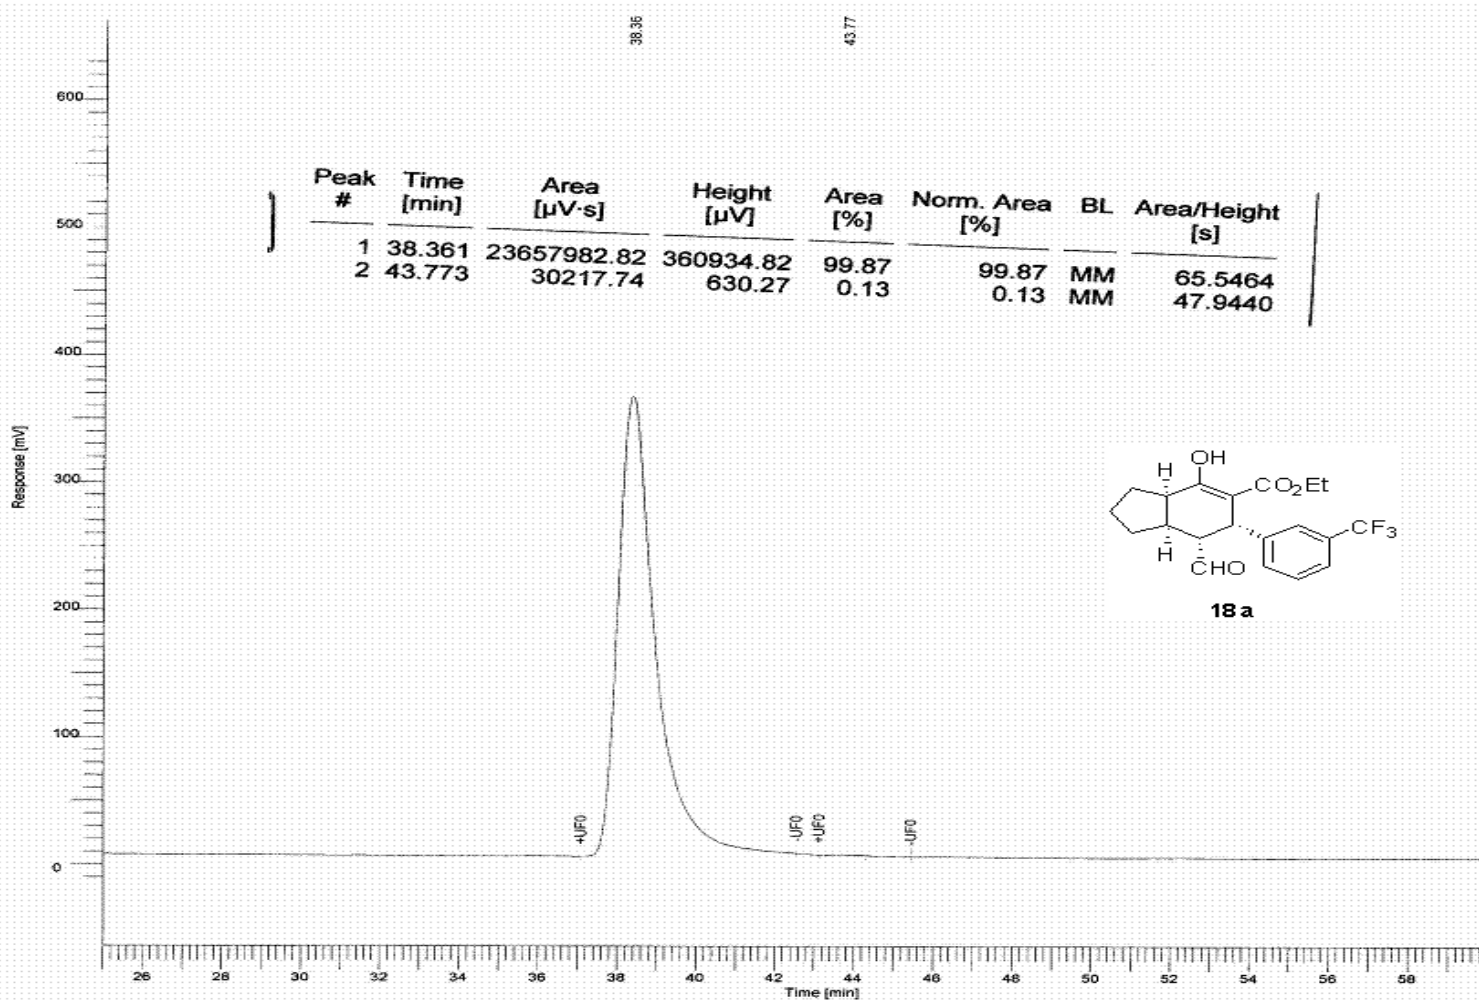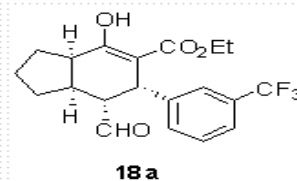

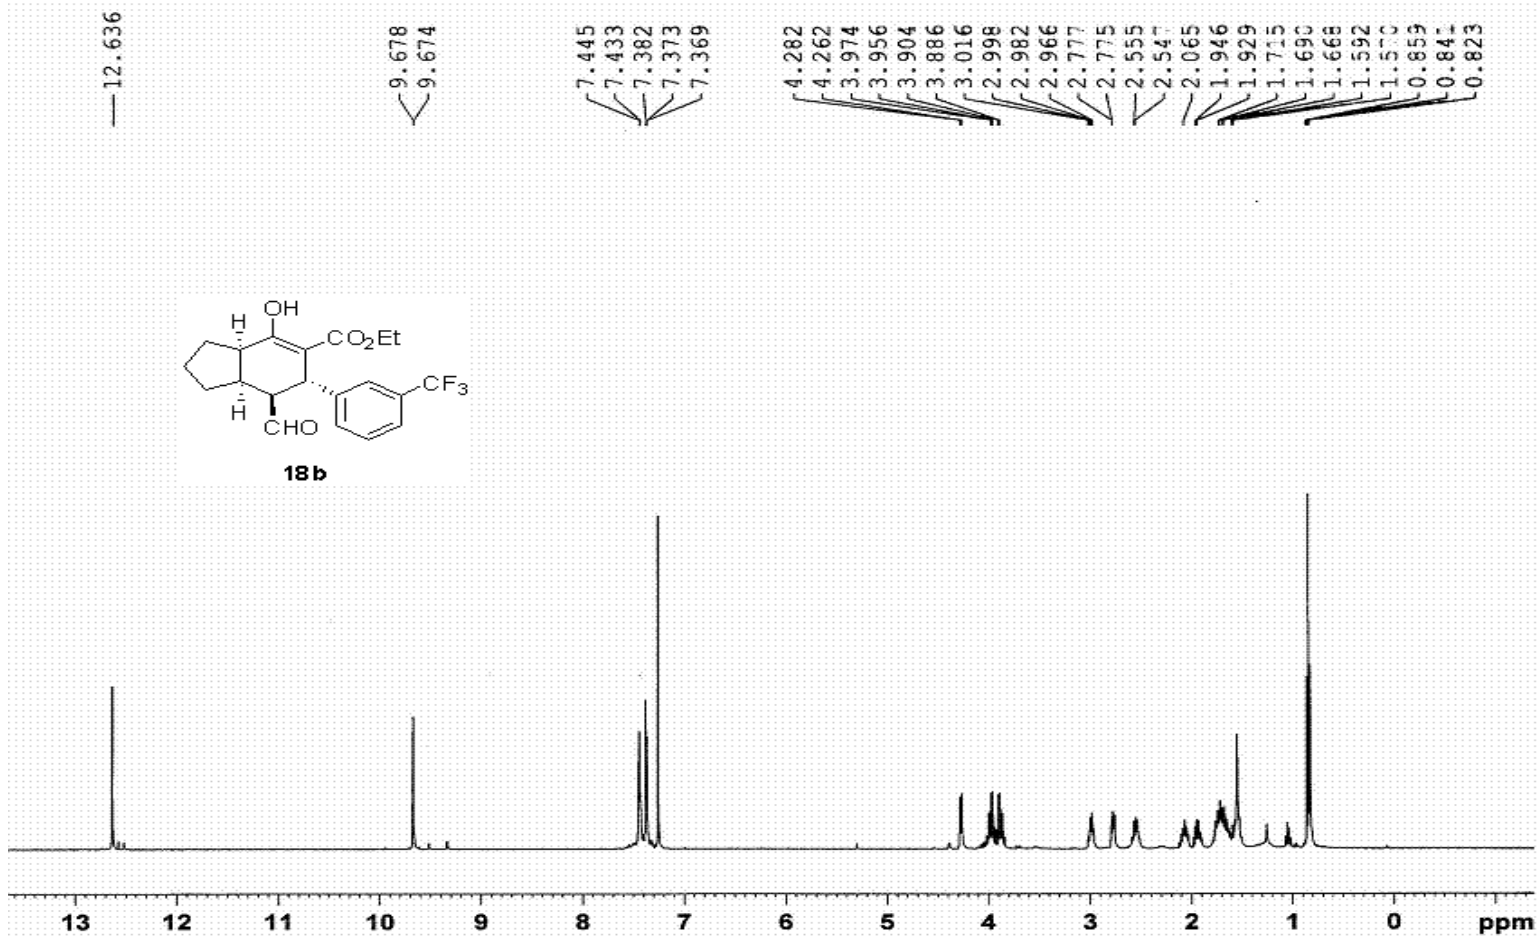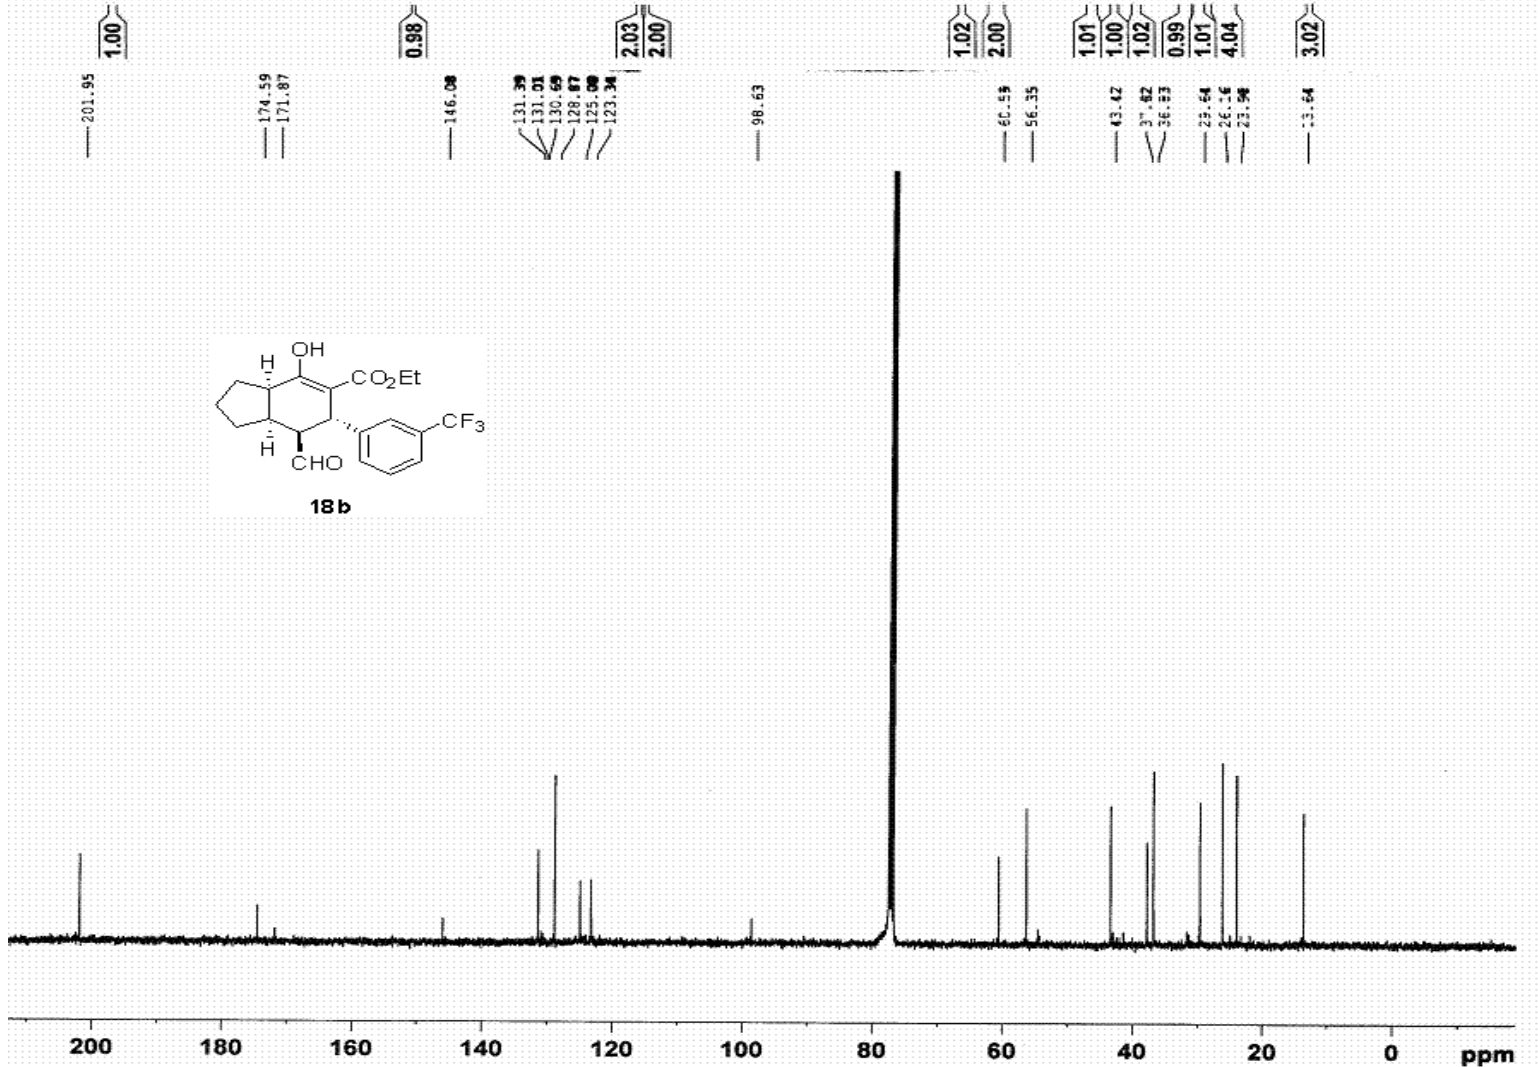

| Peak # | Time [min] | Area [ $\mu\text{V}\cdot\text{s}$ ] | Height [ $\mu\text{V}$ ] | Area [%] | Norm. Area [%] | BL | Area/Height [s] |
|--------|------------|-------------------------------------|--------------------------|----------|----------------|----|-----------------|
| 1      | 25.520     | 6263150.07                          | 161105.08                | 48.21    | 48.21          | MM | 38.8762         |
| 2      | 29.986     | 6727520.29                          | 140583.13                | 51.79    | 51.79          | MM | 47.8544         |

Response [mV]

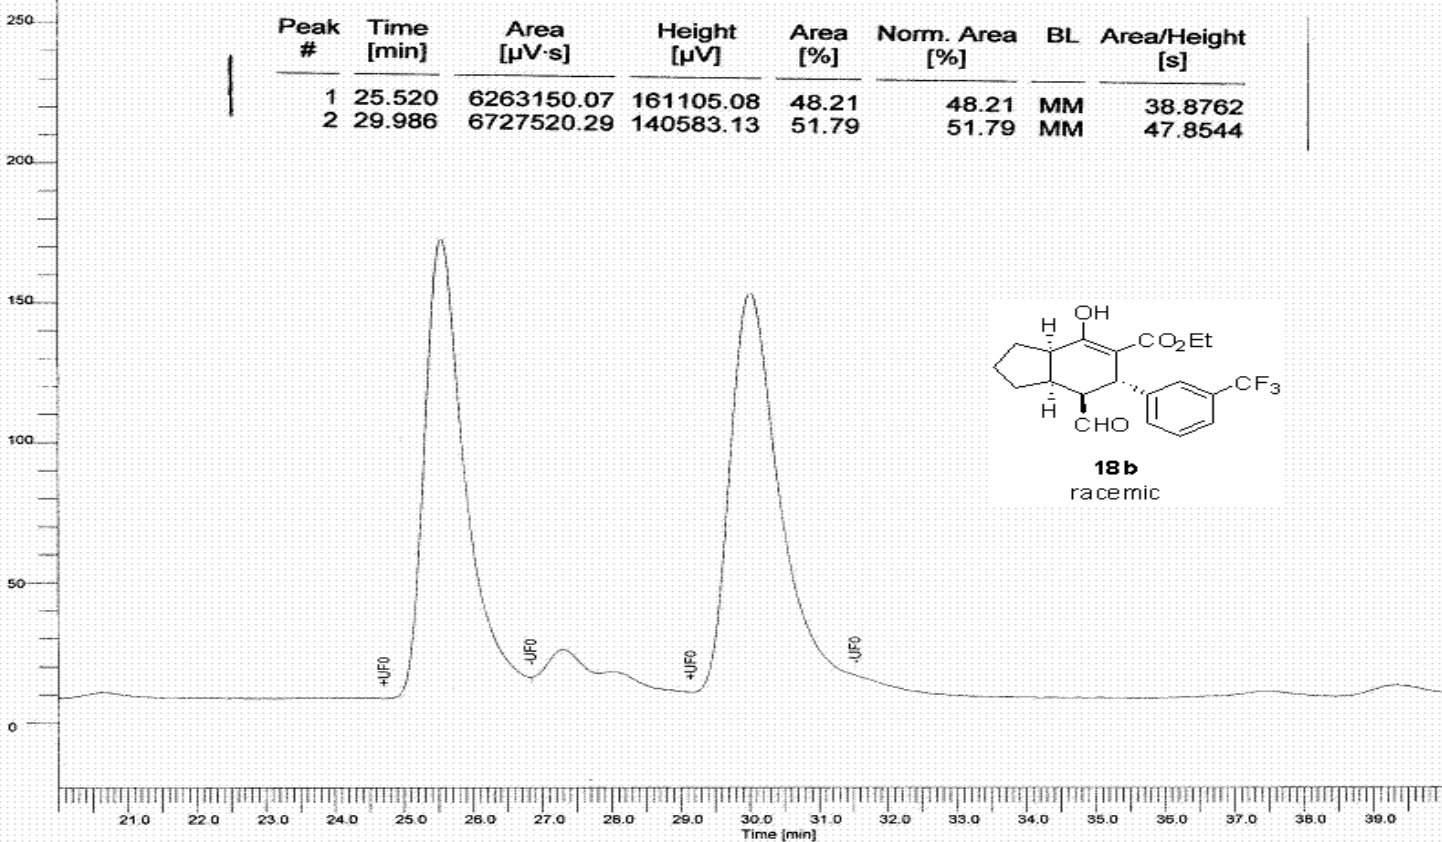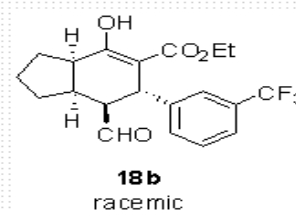

25.34

30.35

| Peak # | Time [min] | Area [ $\mu\text{V}\cdot\text{s}$ ] | Height [ $\mu\text{V}$ ] | Area [%] | Norm. Area [%] | BL | Area/Height [s] |
|--------|------------|-------------------------------------|--------------------------|----------|----------------|----|-----------------|
| 1      | 25.337     | 127778.30                           | 3381.56                  | 0.42     | 0.42           | MM | 37.7868         |
| 2      | 30.345     | 30632366.42                         | 500425.02                | 99.58    | 99.58          | MM | 61.2127         |

Response [mV]

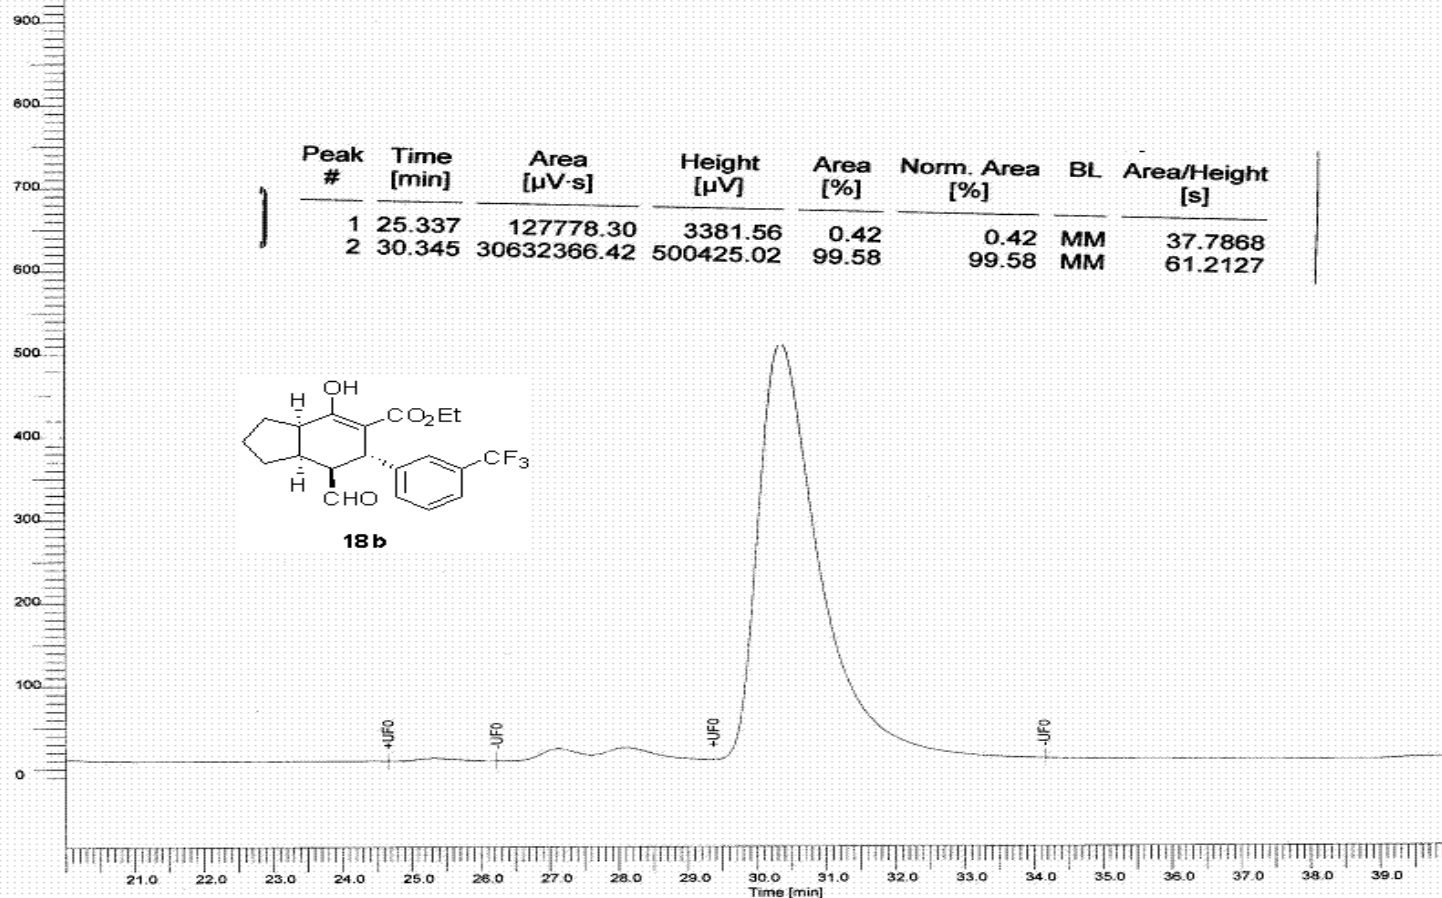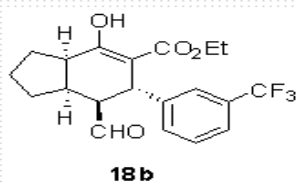

12.543

9.325  
9.317

7.103  
7.085  
4.357  
4.345  
4.107  
4.089  
4.042  
4.024  
3.008  
2.986  
2.963  
2.941  
2.695  
2.674  
2.513  
2.505  
2.501  
2.493  
2.482  
2.474  
2.469  
2.462  
2.315  
2.306  
2.013  
1.800

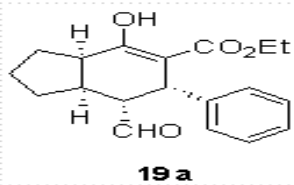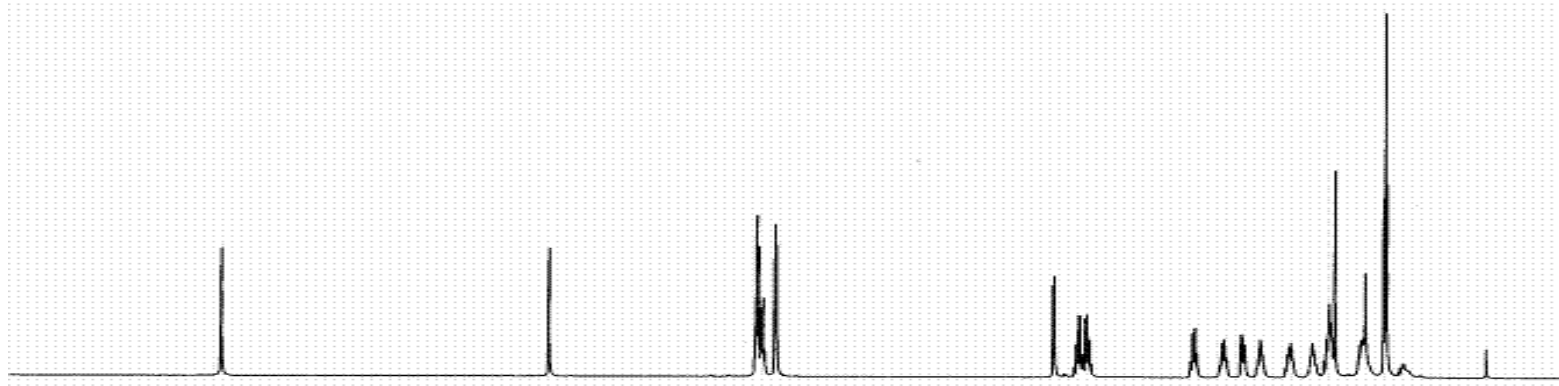

14 13 12 11 10 9 8 7 6 5 4 3 2 1 0

2.472  
1.00  
175.28  
171.73  
1.00  
139.71  
128.93  
128.38  
127.11  
2.04  
99.94  
77.48  
77.22  
76.85  
62.65  
54.78  
1.00  
2.01  
43.11  
42.69  
1.00  
32.45  
31.55  
31.35  
1.00  
25.53  
1.00  
1.01  
1.00  
2.01  
1.00  
3.01

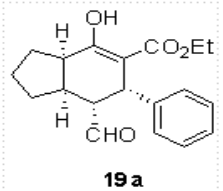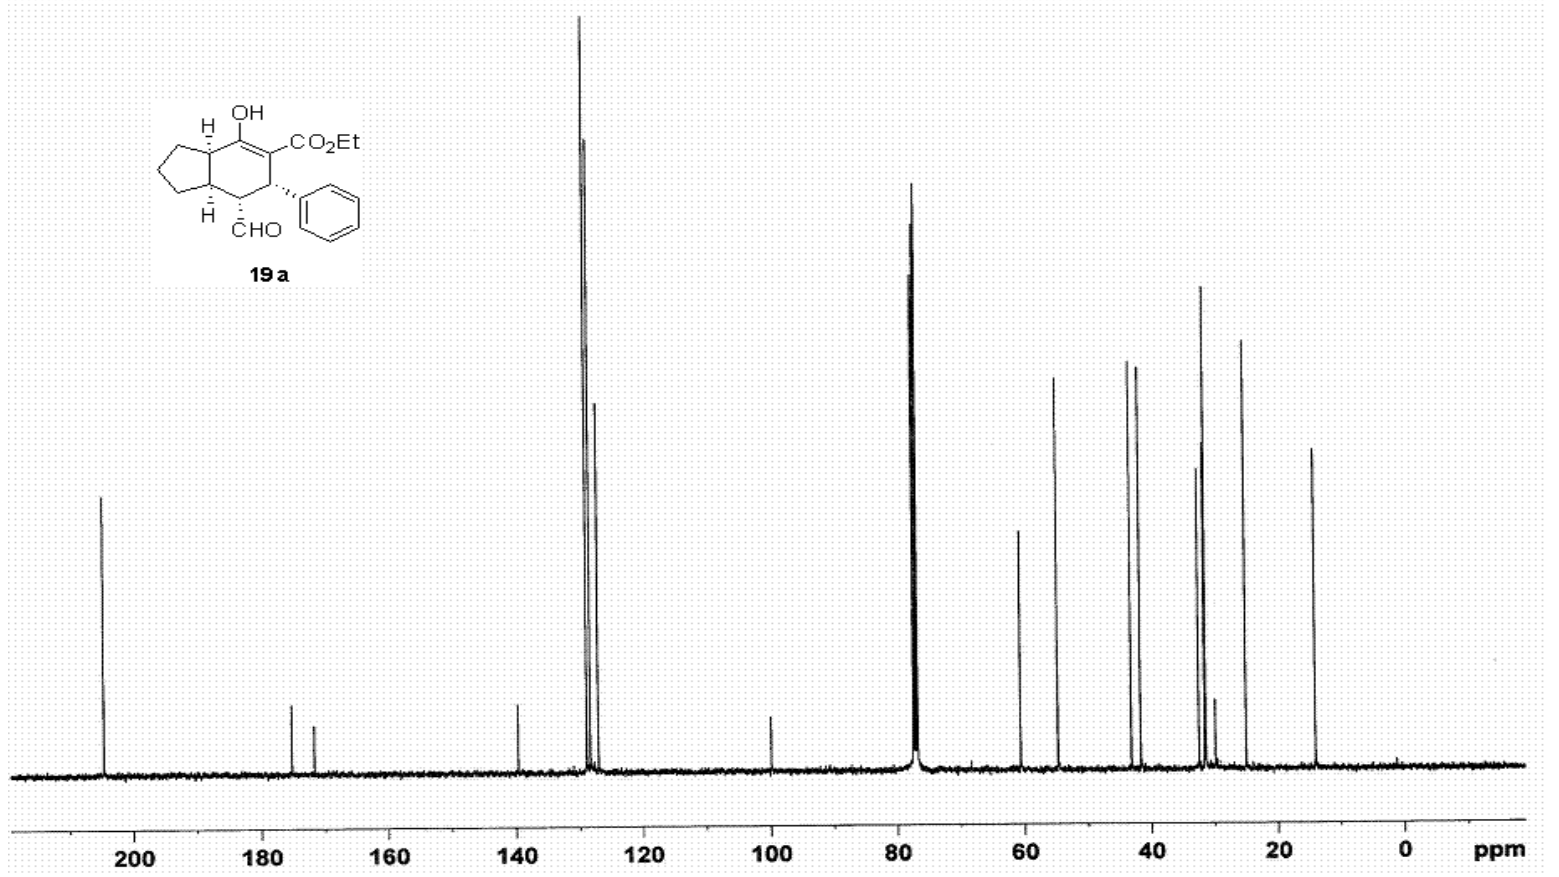

200 180 160 140 120 100 80 60 40 20 0 ppm

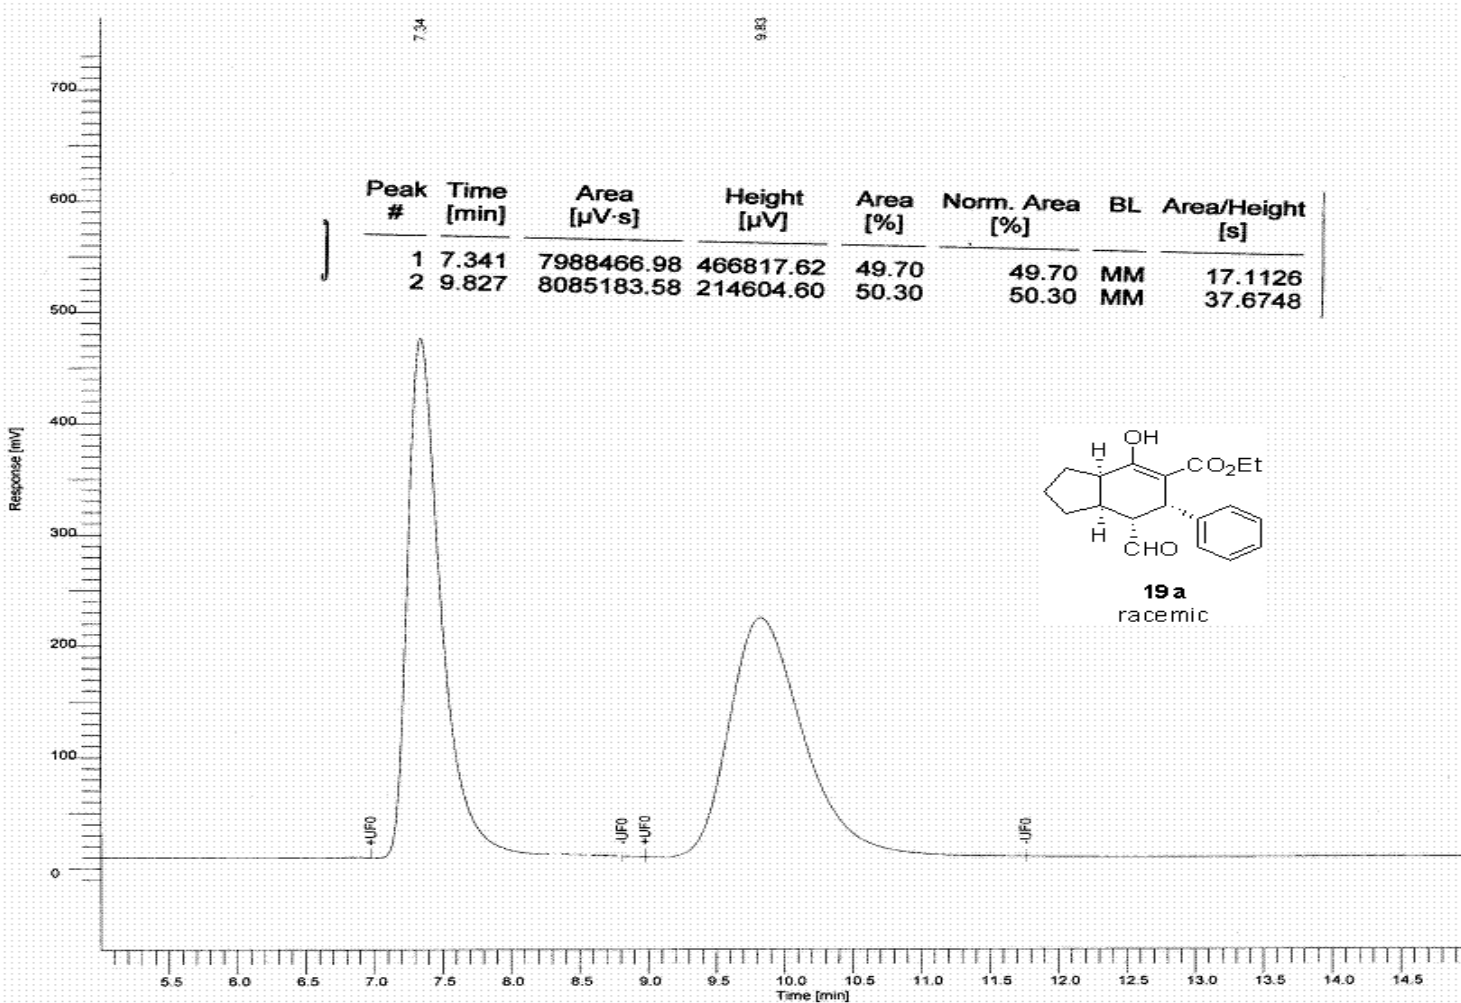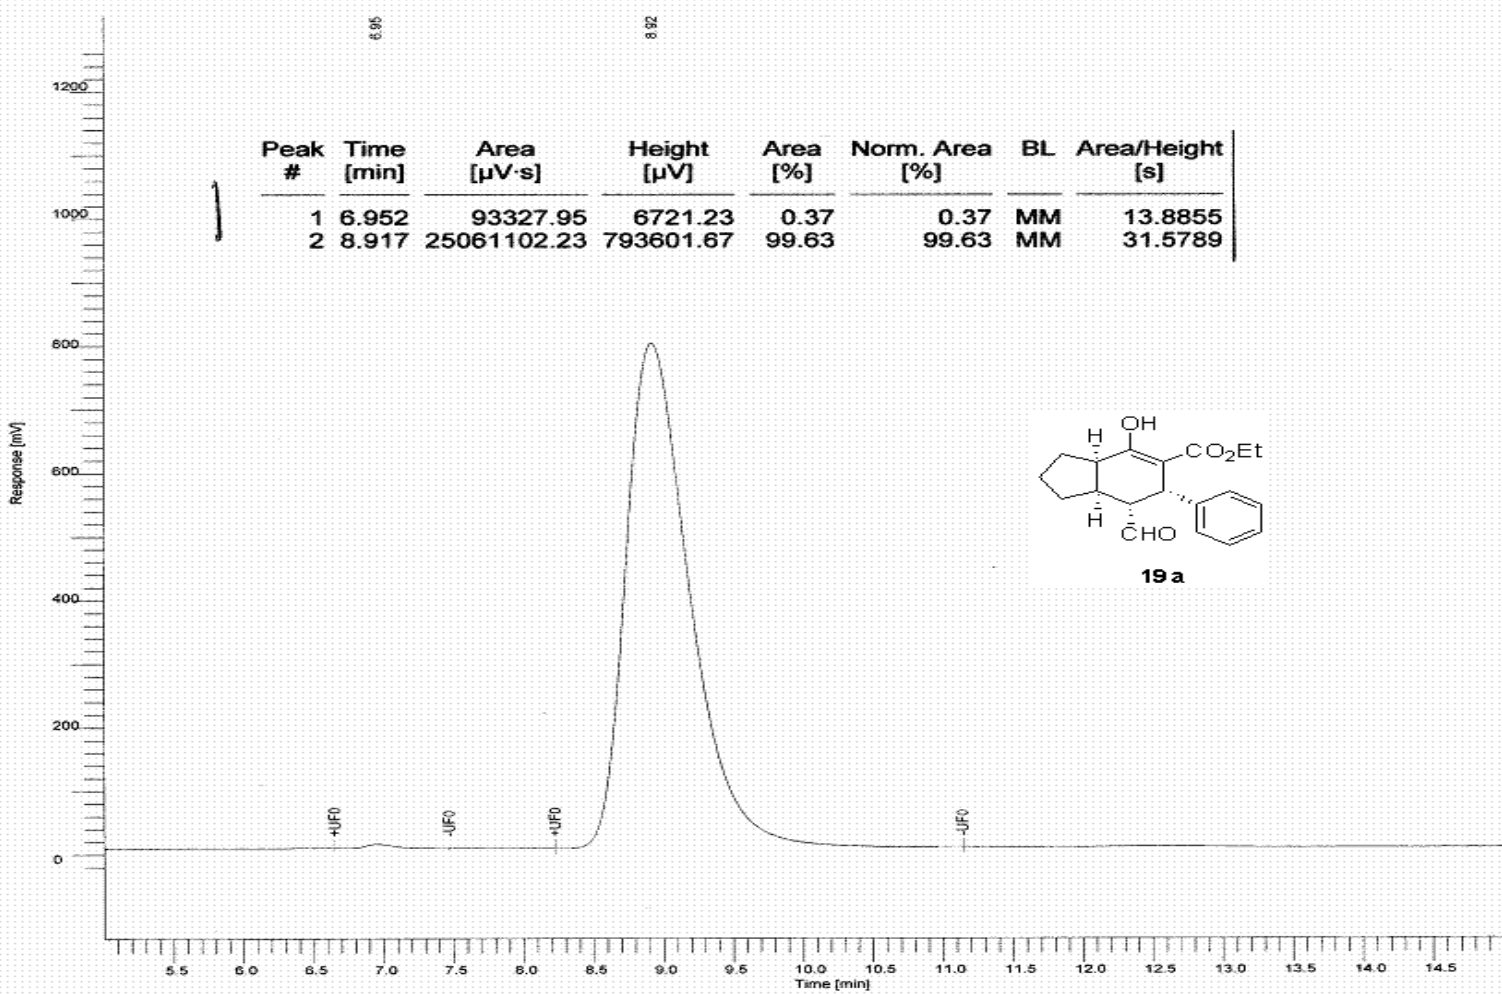

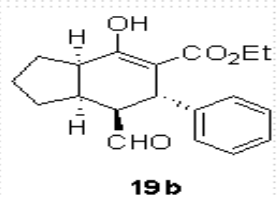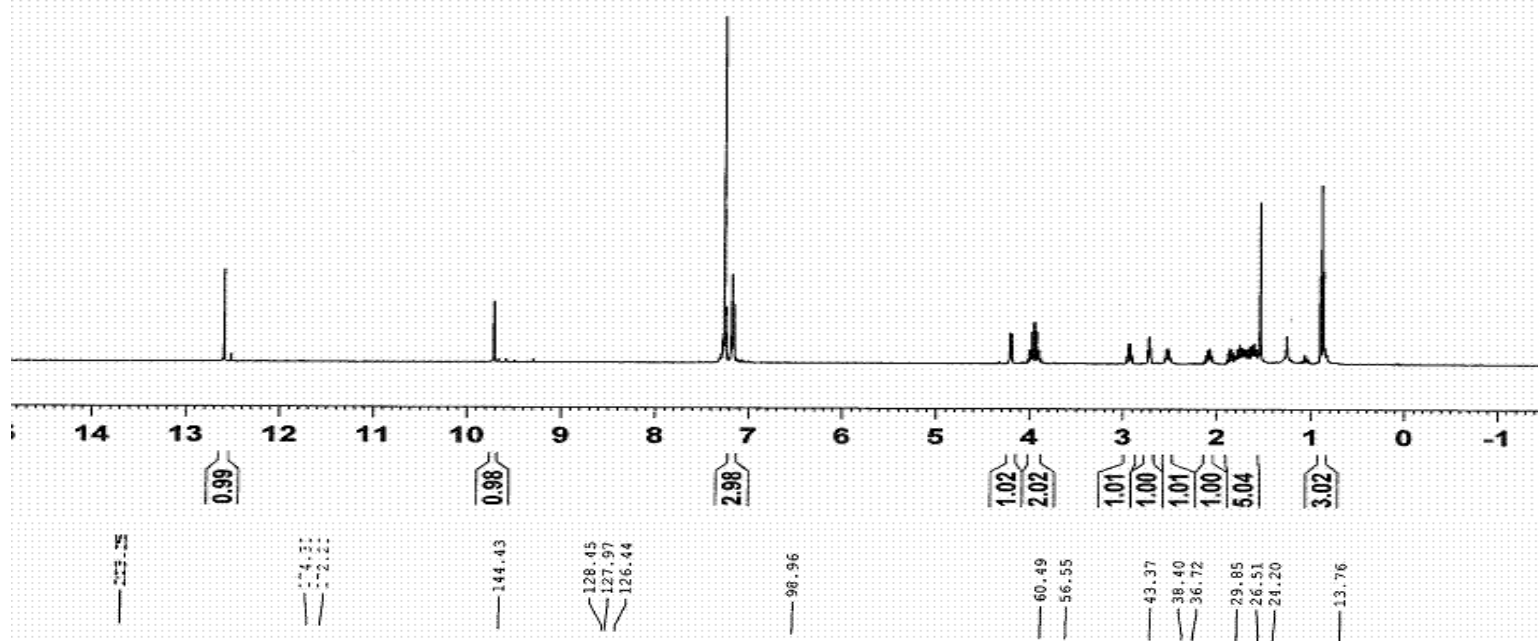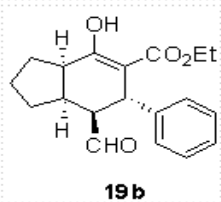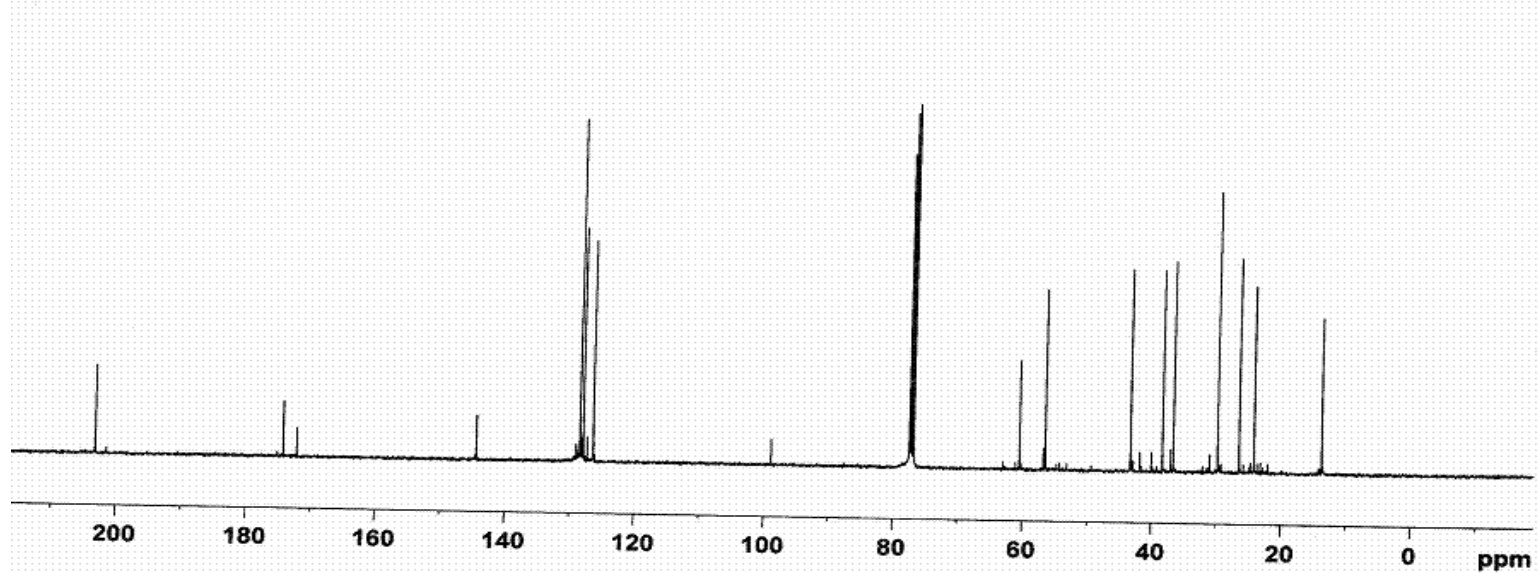



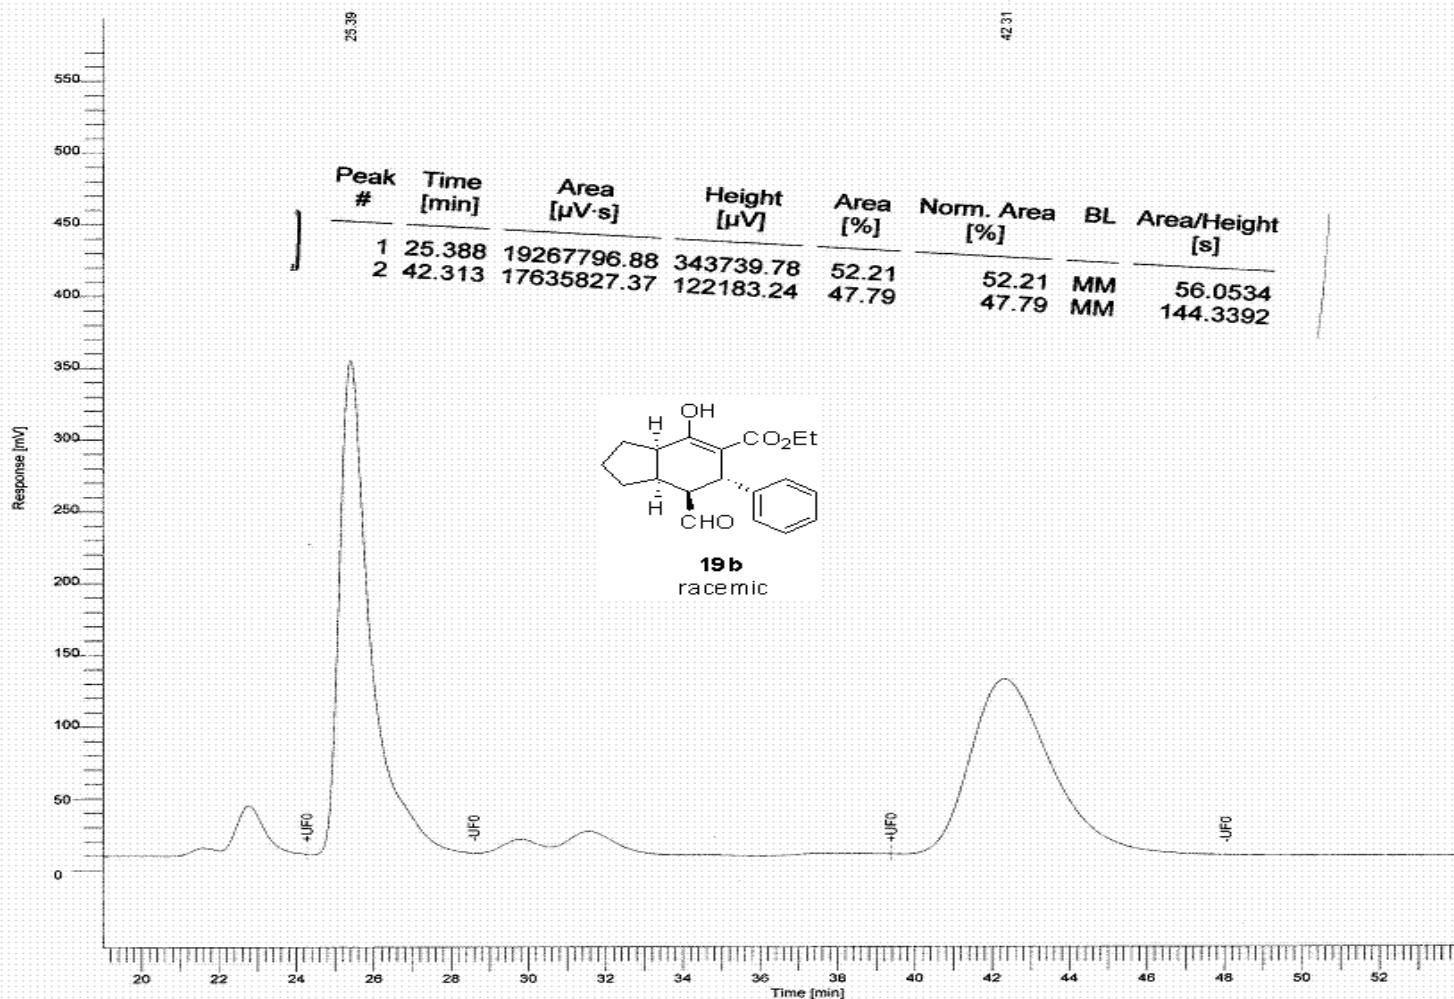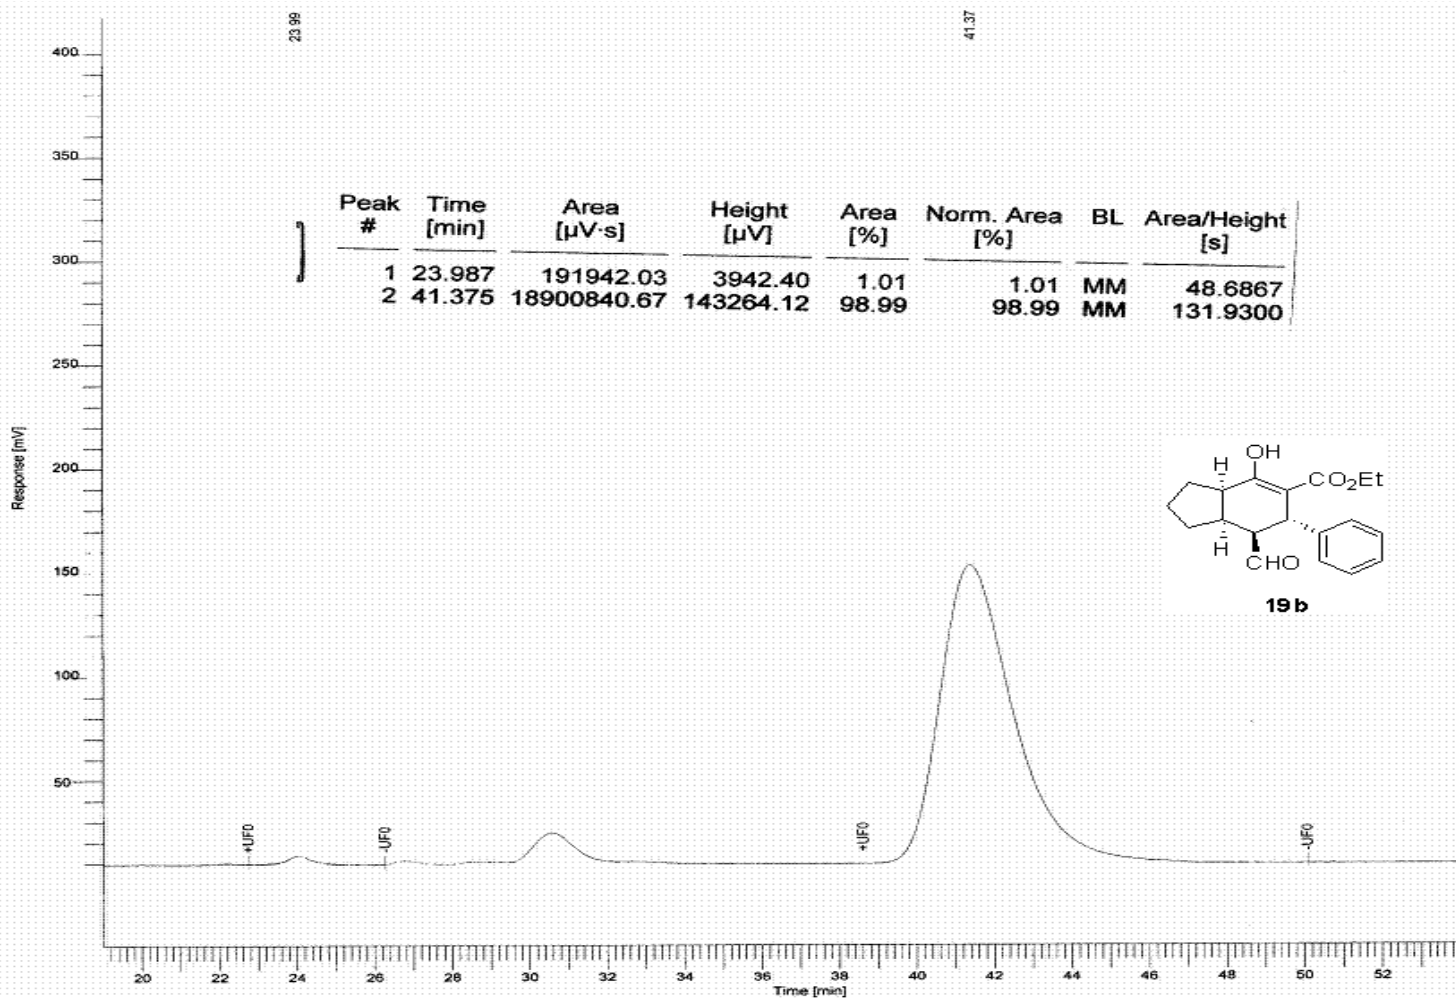

12.511

9.310  
9.303

7.062  
7.042  
6.958  
6.938

4.306  
4.294  
4.103  
3.986  
2.970  
2.949  
2.939  
2.925  
2.903  
2.658  
2.638  
2.445  
2.433  
2.292  
2.003  
1.983  
1.771  
1.600  
1.596  
1.288  
1.264  
1.107  
1.089  
1.071

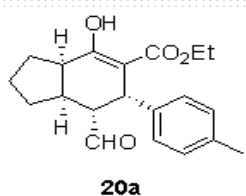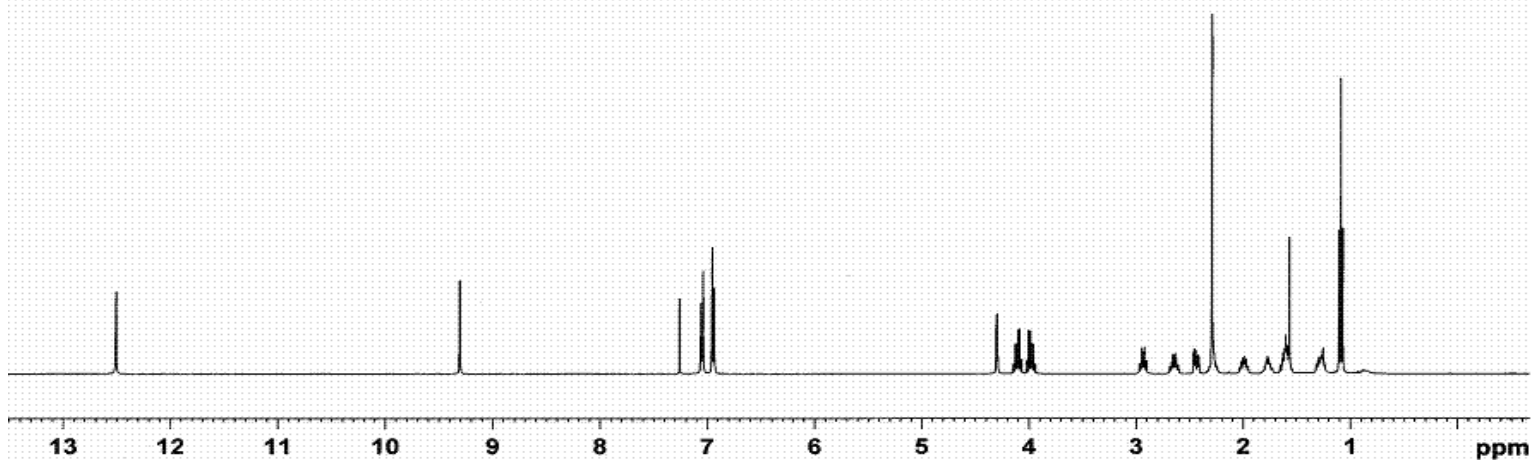

13 12 11 10 9 8 7 6 5 4 3 2 1 ppm

204.87

175.17  
171.78

136.67  
136.59  
129.08  
128.77

100.07

60.66  
54.91

43.16  
41.24  
32.48  
31.58  
31.35  
25.06  
21.12  
14.09

0.97

1.00

2.03  
2.01

1.02  
1.02  
1.03

1.00  
1.03  
1.02  
4.04  
1.00  
1.05  
2.00  
1.04  
3.02

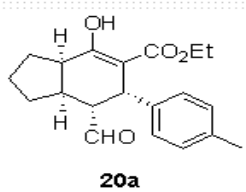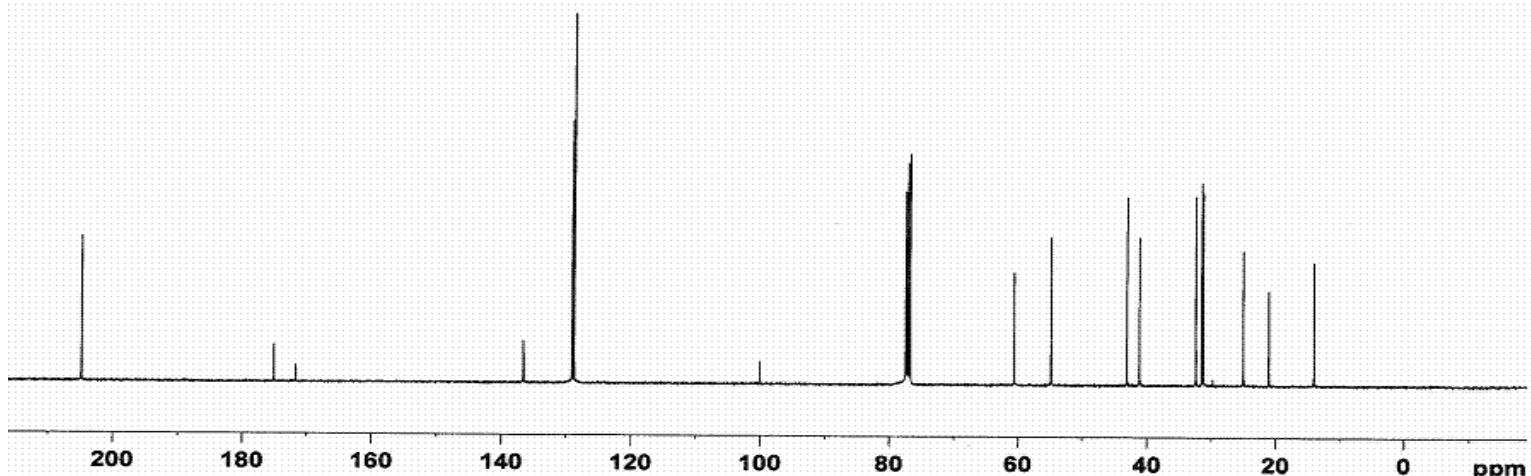

200 180 160 140 120 100 80 60 40 20 0 ppm

12.63

15.06

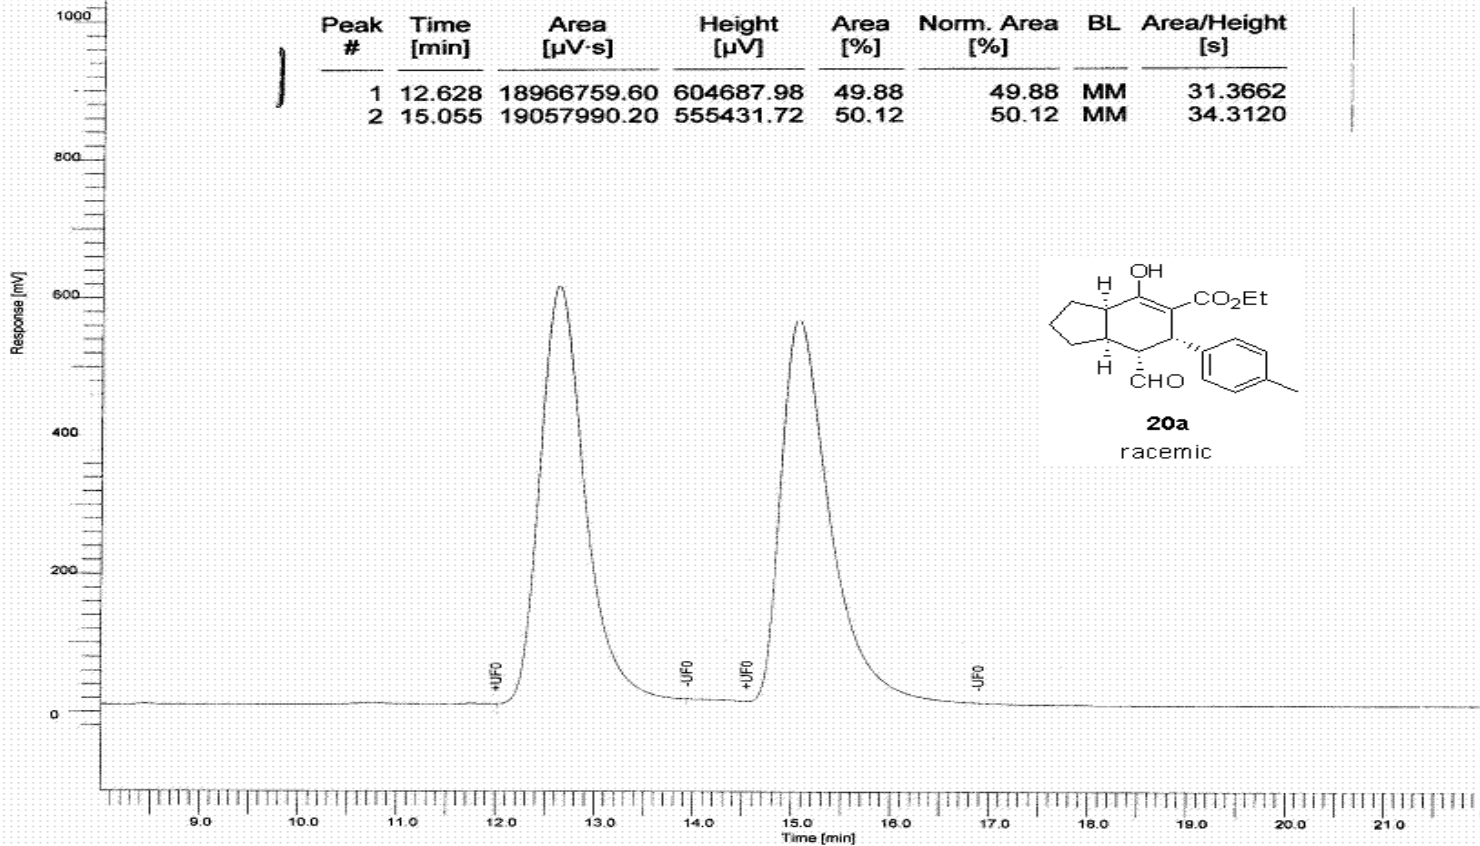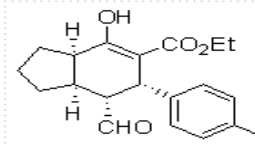

**20a**  
racemic

12.97

15.09

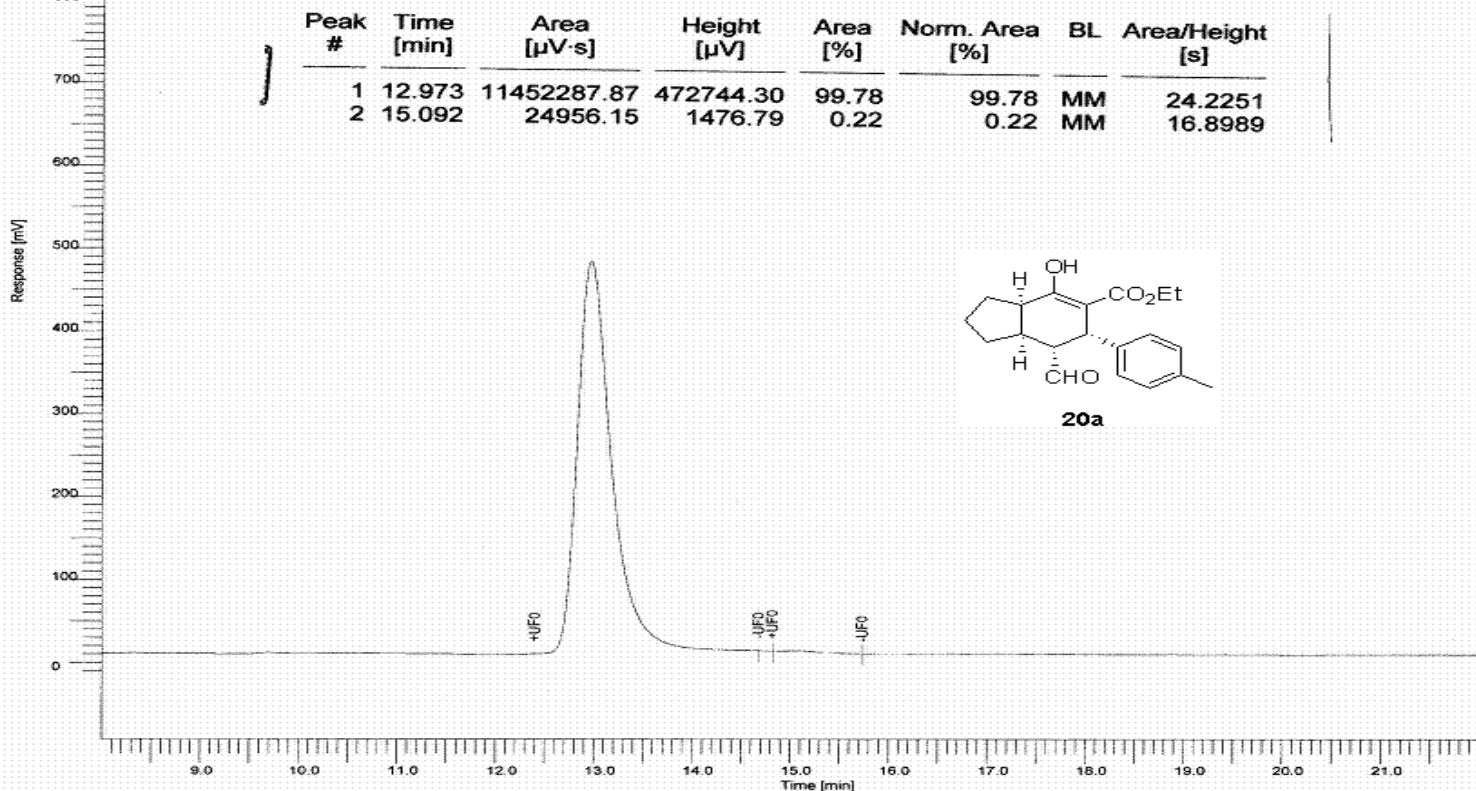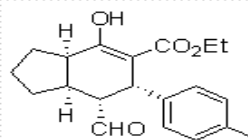

**20a**

12.576

9.714  
9.709

7.060  
7.051  
4.175  
4.159  
3.979  
3.972  
3.961  
3.954  
2.938  
2.920  
2.900  
2.883  
2.680  
2.526  
2.513  
2.507  
2.495  
2.303  
2.119  
2.107  
2.095  
2.086  
2.074  
1.836  
1.819  
1.766  
1.759  
1.705  
1.641  
1.621  
1.582  
1.576

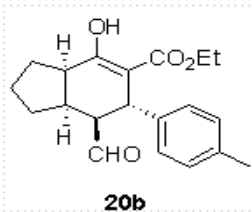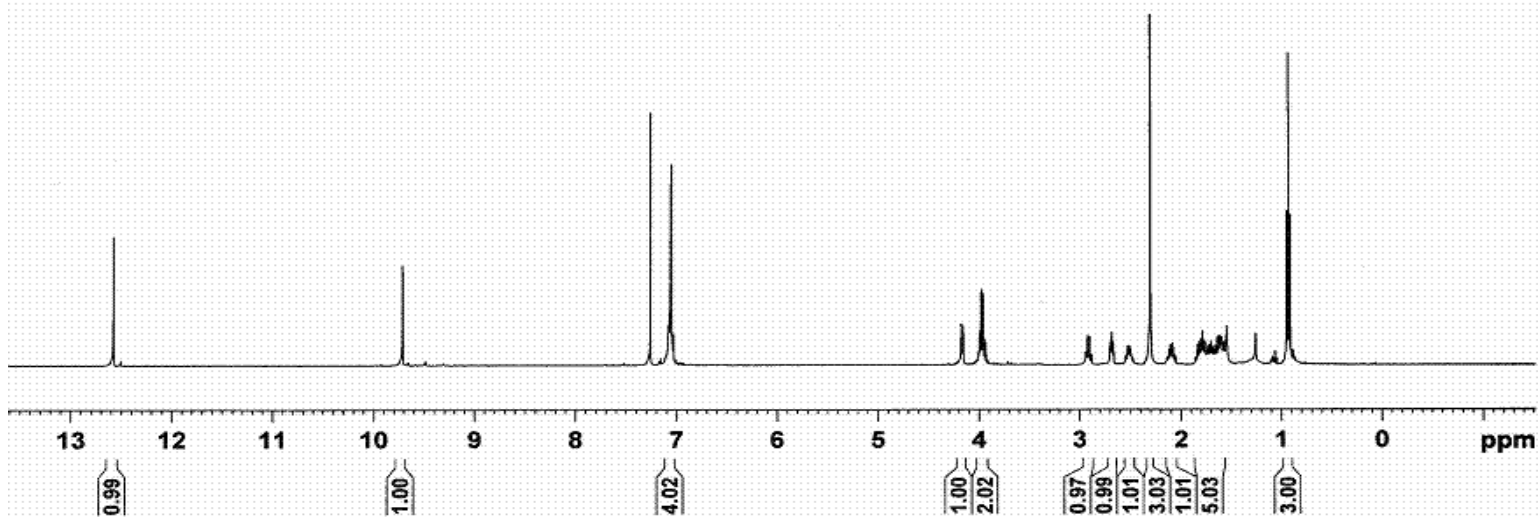

203.55

174.26  
172.25

141.18  
135.95

129.13  
127.83

96.94

60.51  
56.66

43.33  
38.15  
36.59

29.98  
26.70  
24.28  
21.10

13.84

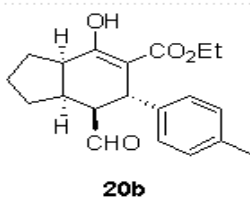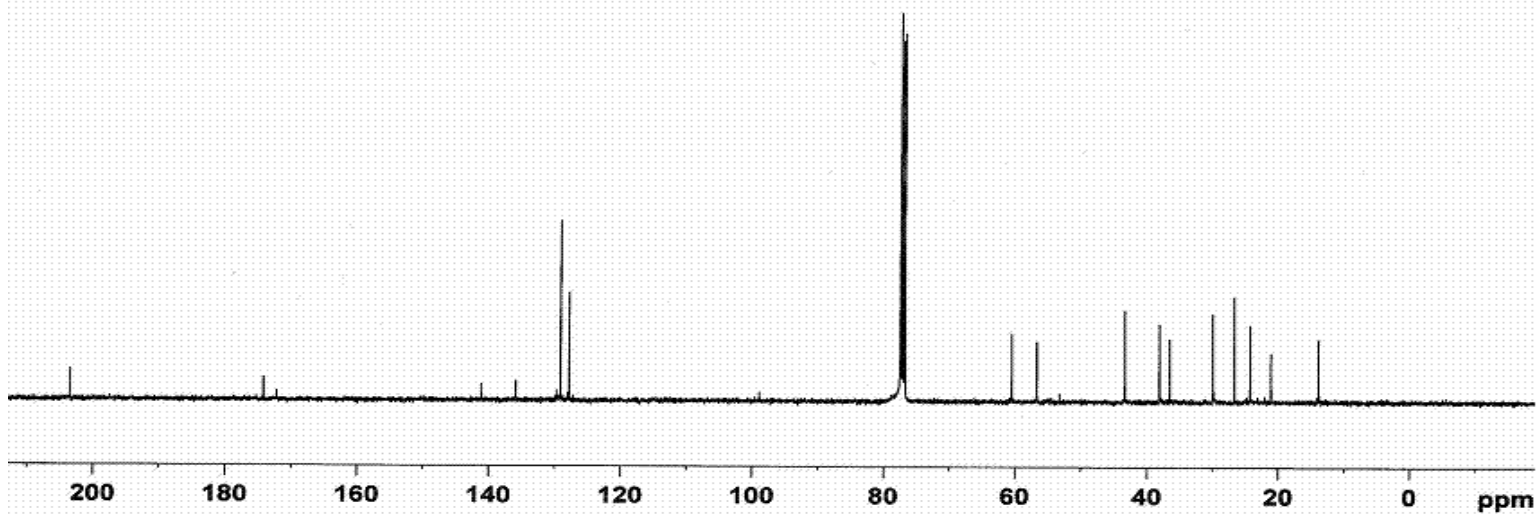

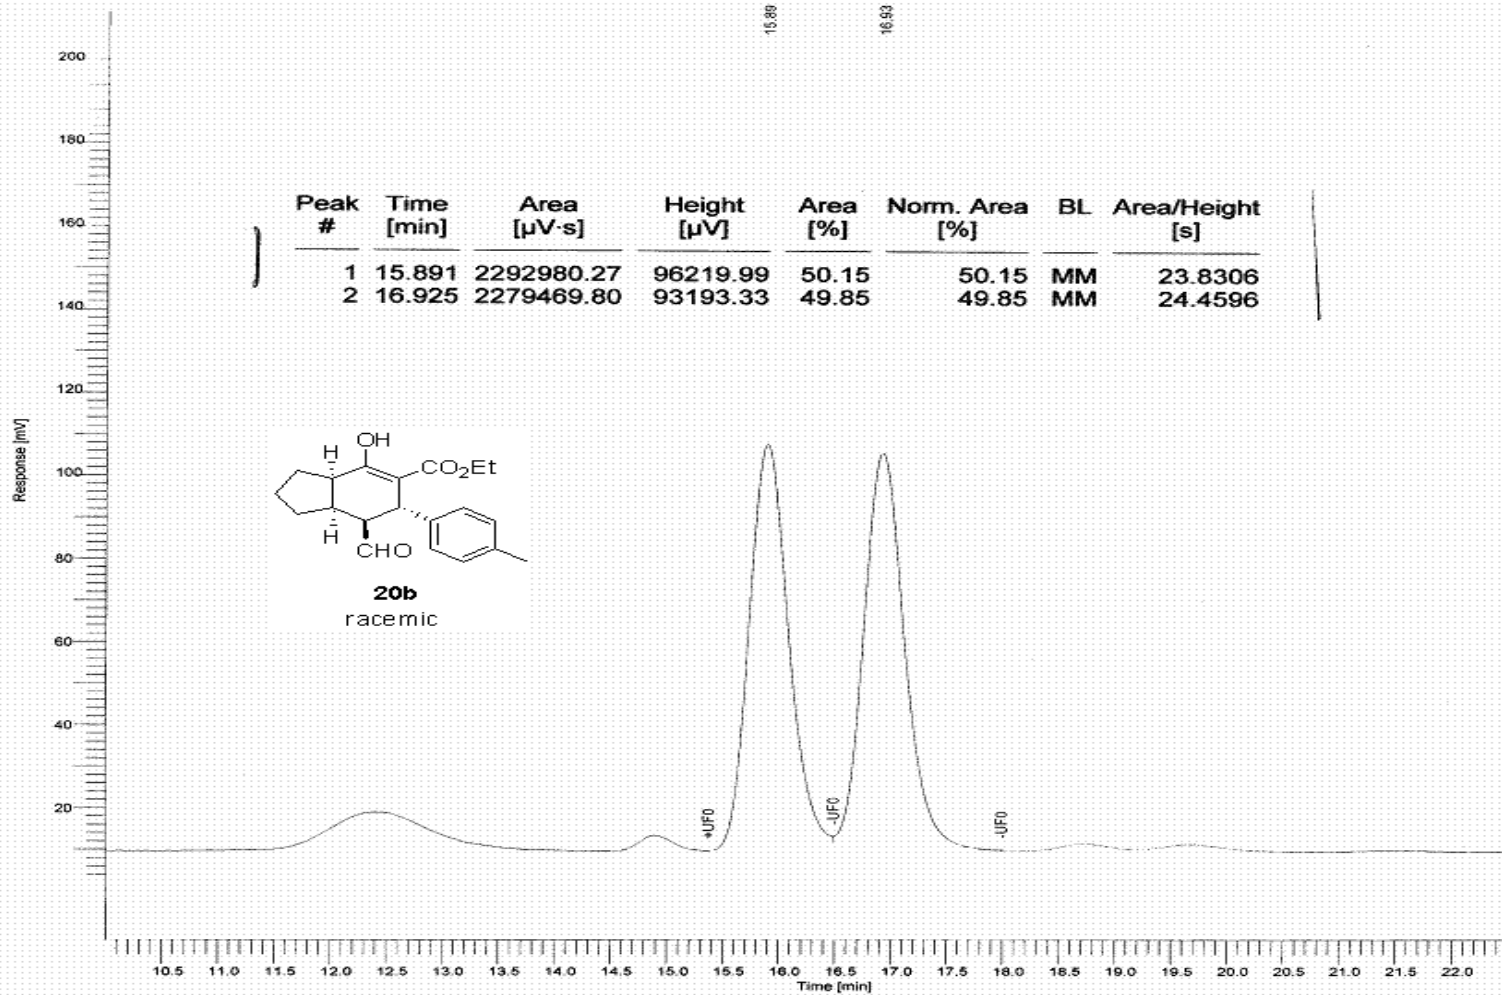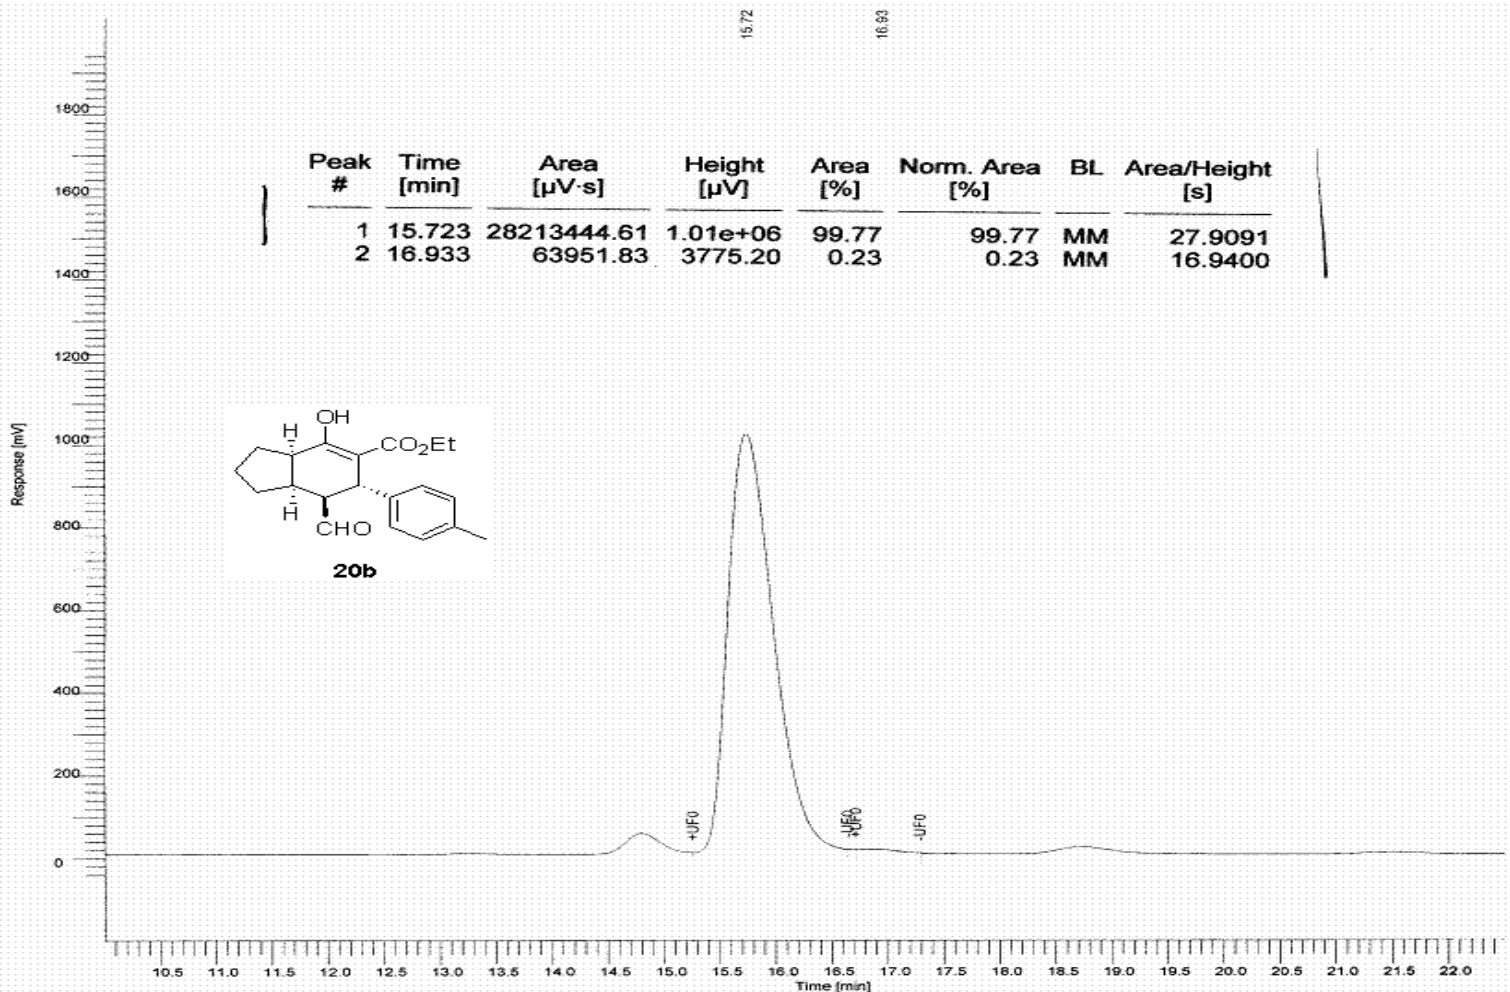

—12.536

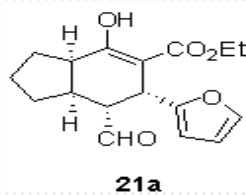

9.586  
9.580  
7.274  
7.272  
7.270  
7.268  
6.243  
6.238  
6.235  
6.230  
5.954  
5.952  
5.947  
5.946  
4.419  
4.408  
4.160  
4.159  
2.897  
2.874  
2.851  
2.829  
2.610  
2.395  
2.382  
2.227  
2.066  
2.045  
1.756  
1.751  
1.576  
1.572  
1.341  
1.322  
1.214  
1.196  
1.178

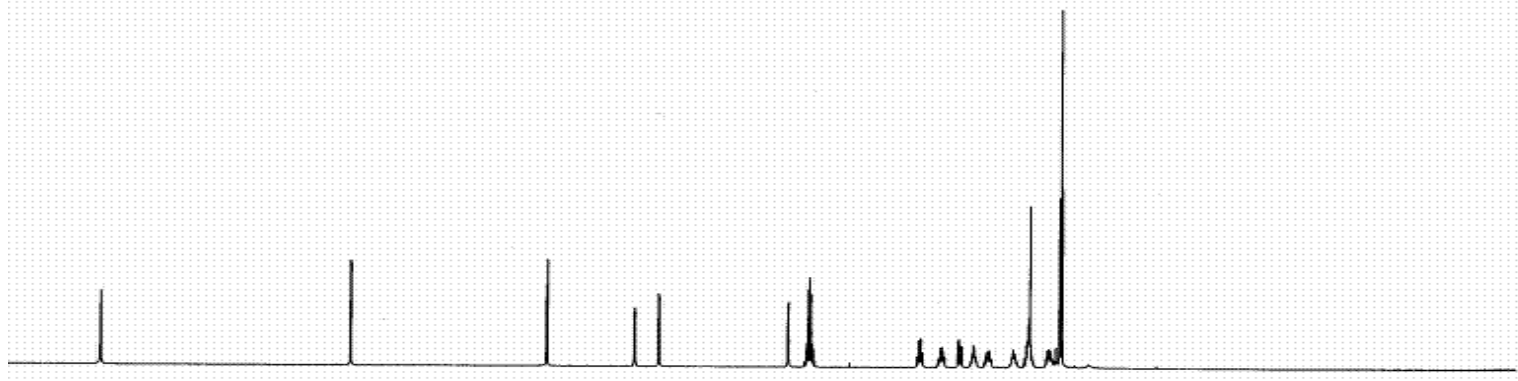

13 12 11 10 9 8 7 6 5 4 3 2 1 0 -1 -2 -3 ppm

0.98 1.00 0.98 1.01 1.01 1.02 2.02 0.98 1.03 1.00 1.02 1.01 1.03 1.00 3.05

203.30 176.18 171.58 154.25 141.86 110.31 107.72 97.78 60.79 54.92 42.79 34.84 33.54 31.84 31.00 25.25 14.24

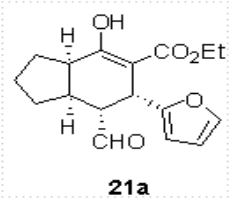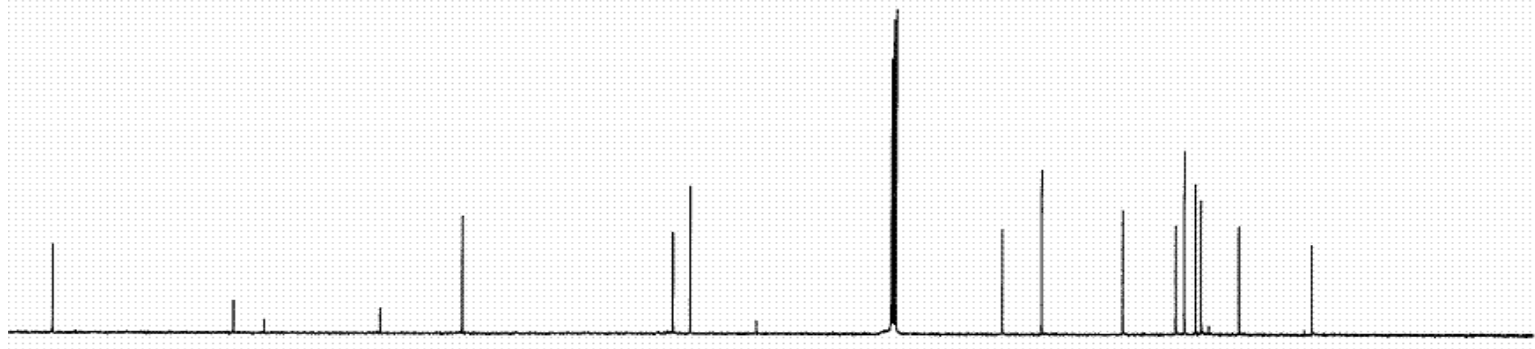

200 180 160 140 120 100 80 60 40 20 0 ppm

23.62

26.61

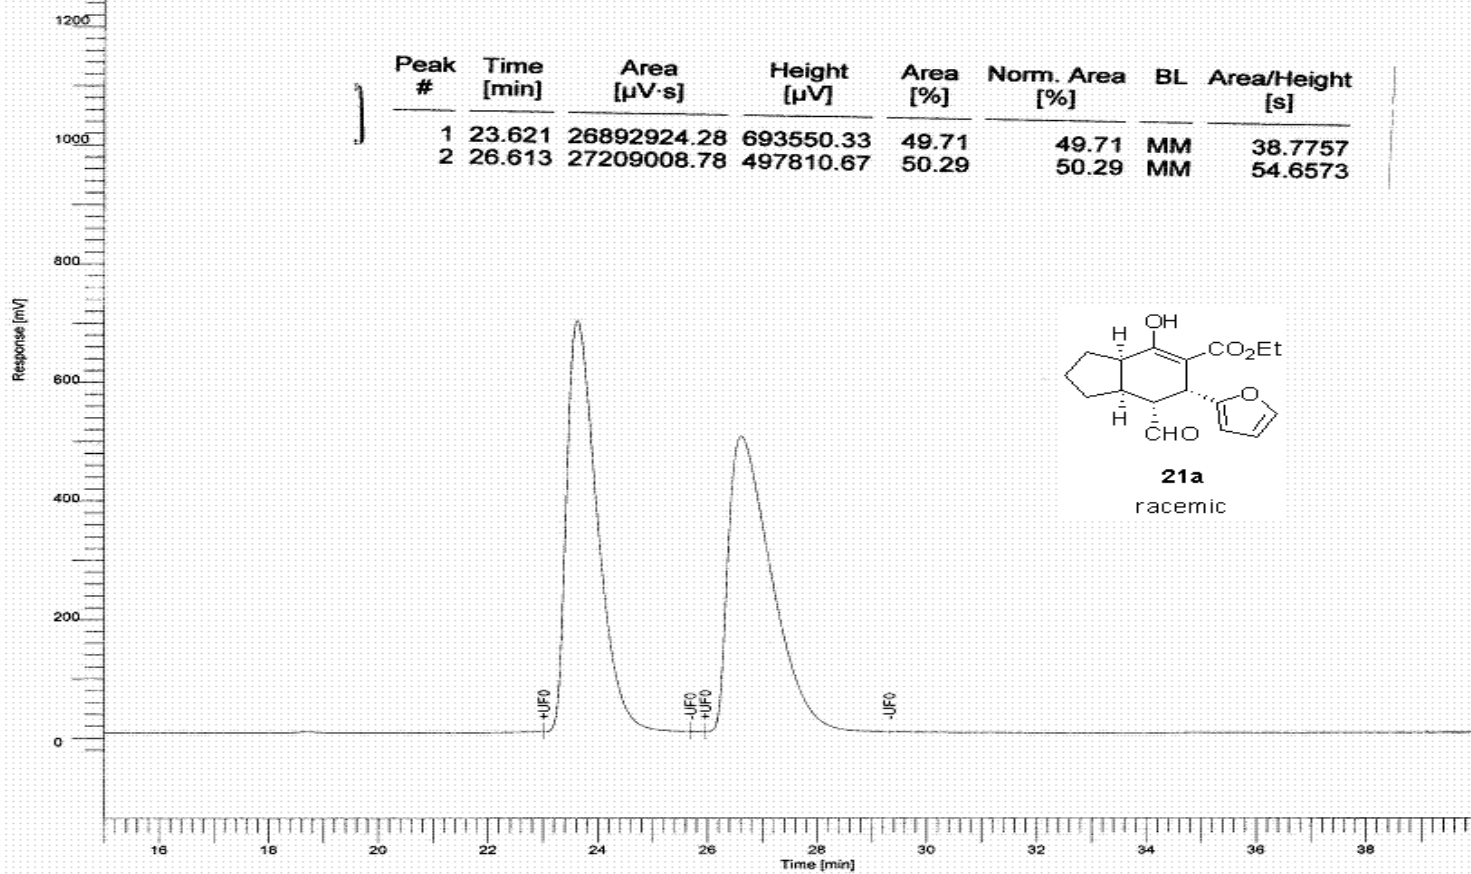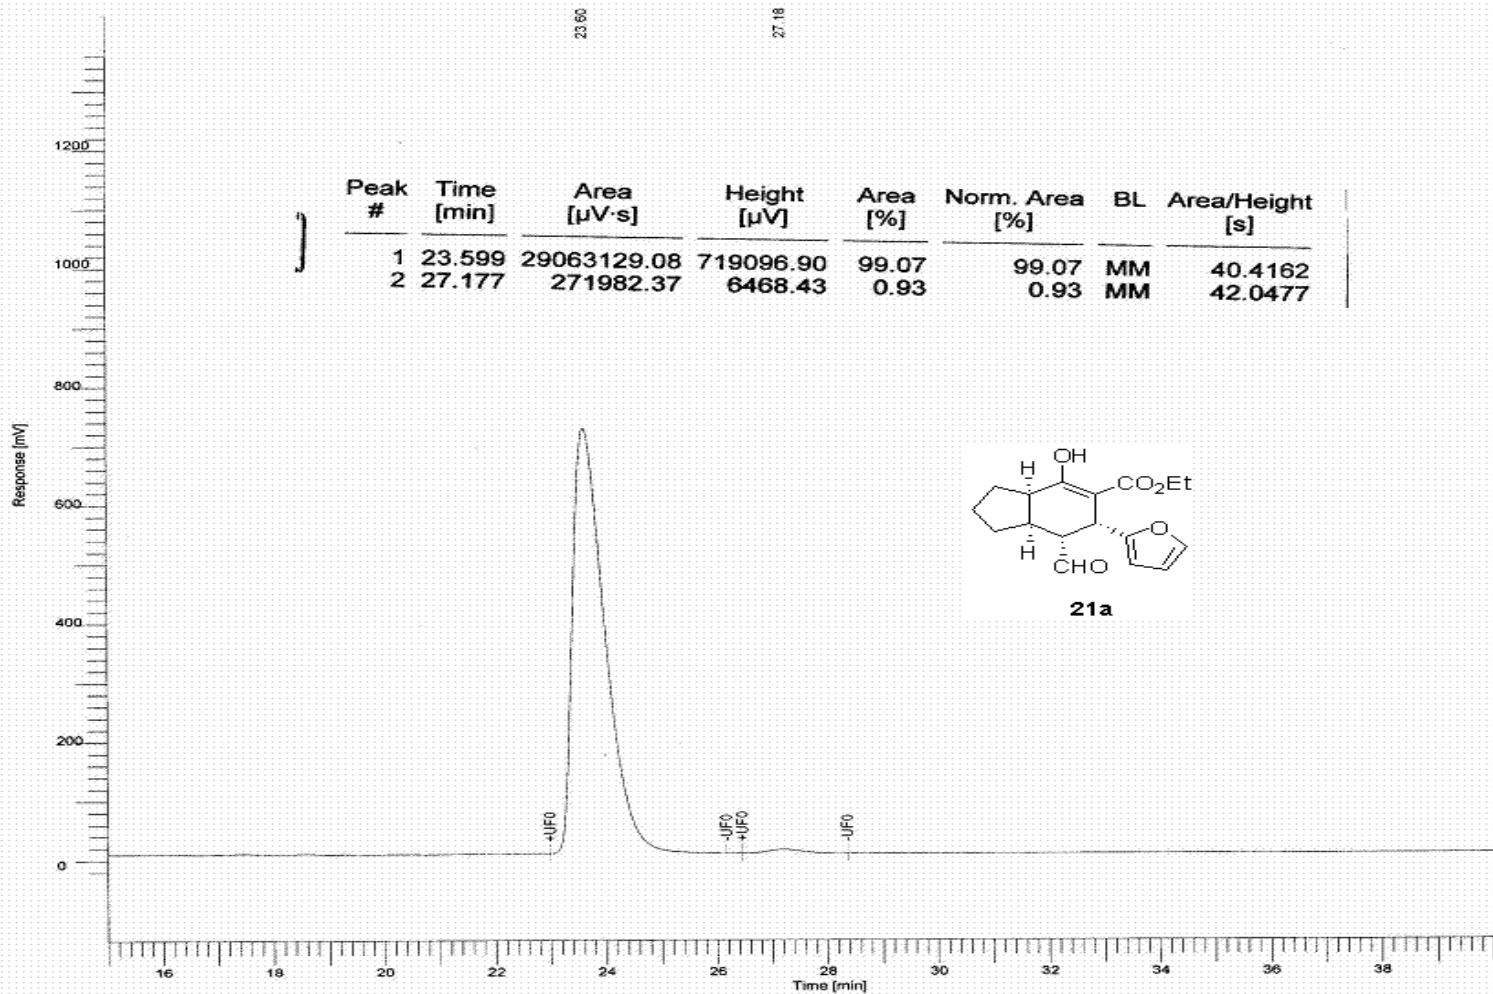

12.611

9.748  
9.743

7.294  
7.292  
7.289  
7.287  
6.266  
6.261  
6.258  
6.253  
5.972  
5.964  
4.329  
4.315  
4.143  
4.125  
4.095  
4.078  
2.892  
2.887  
2.879  
2.874  
2.865  
2.860  
2.841  
2.822  
2.803  
2.572  
2.117  
1.858  
1.695  
1.664  
1.137  
1.119  
1.101

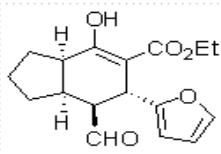

21b

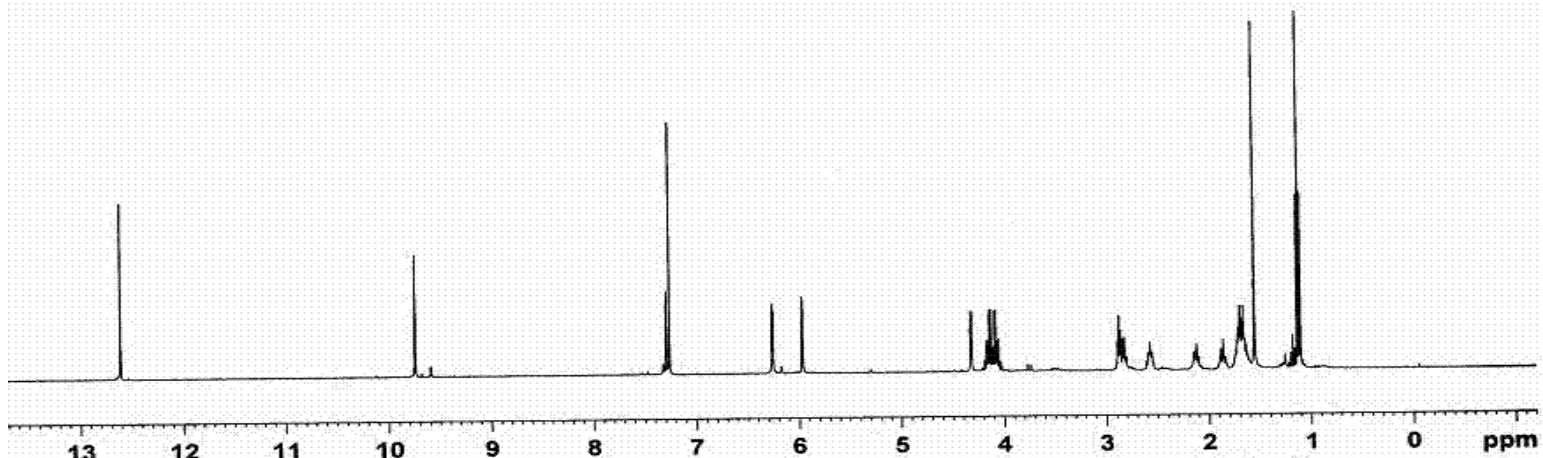

203.00  
174.95  
172.10  
156.36  
141.28  
110.39  
106.47  
96.83  
60.73  
53.38  
43.05  
36.68  
32.88  
30.22  
27.14  
24.19  
14.10

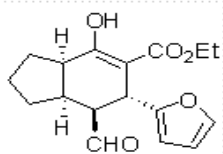

21b

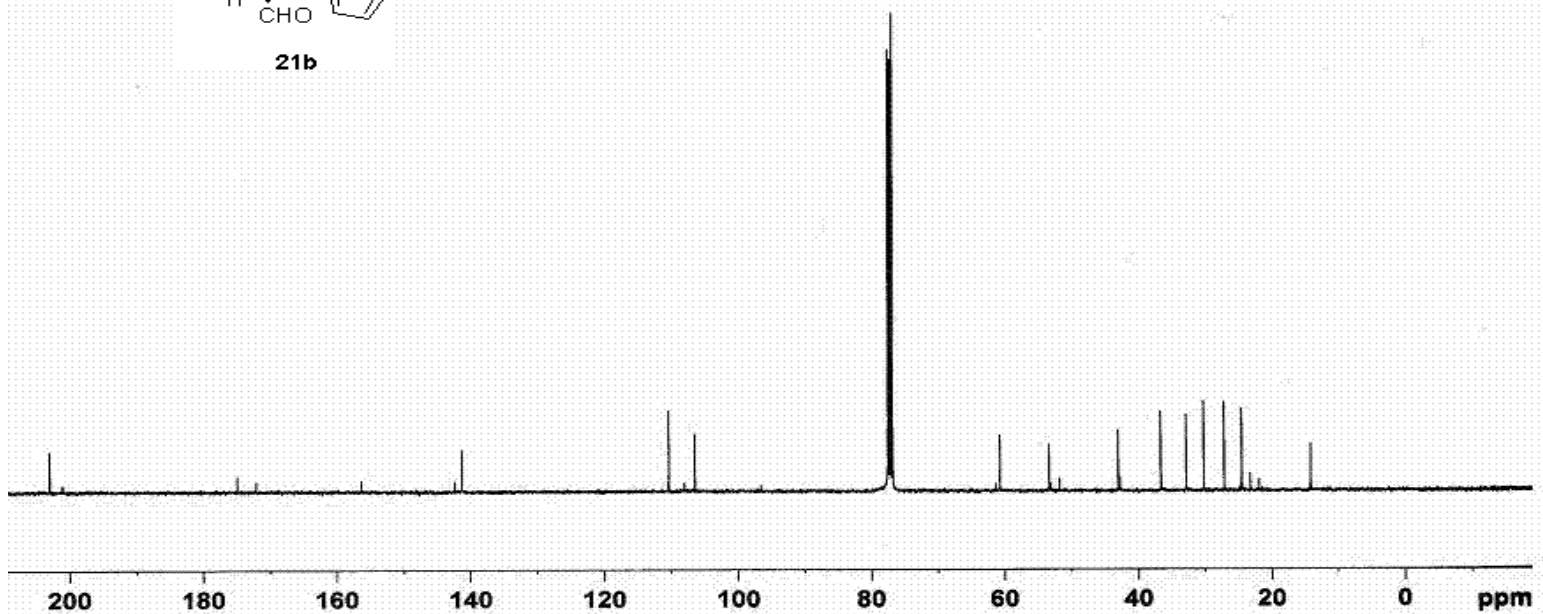

200 180 160 140 120 100 80 60 40 20 0 ppm



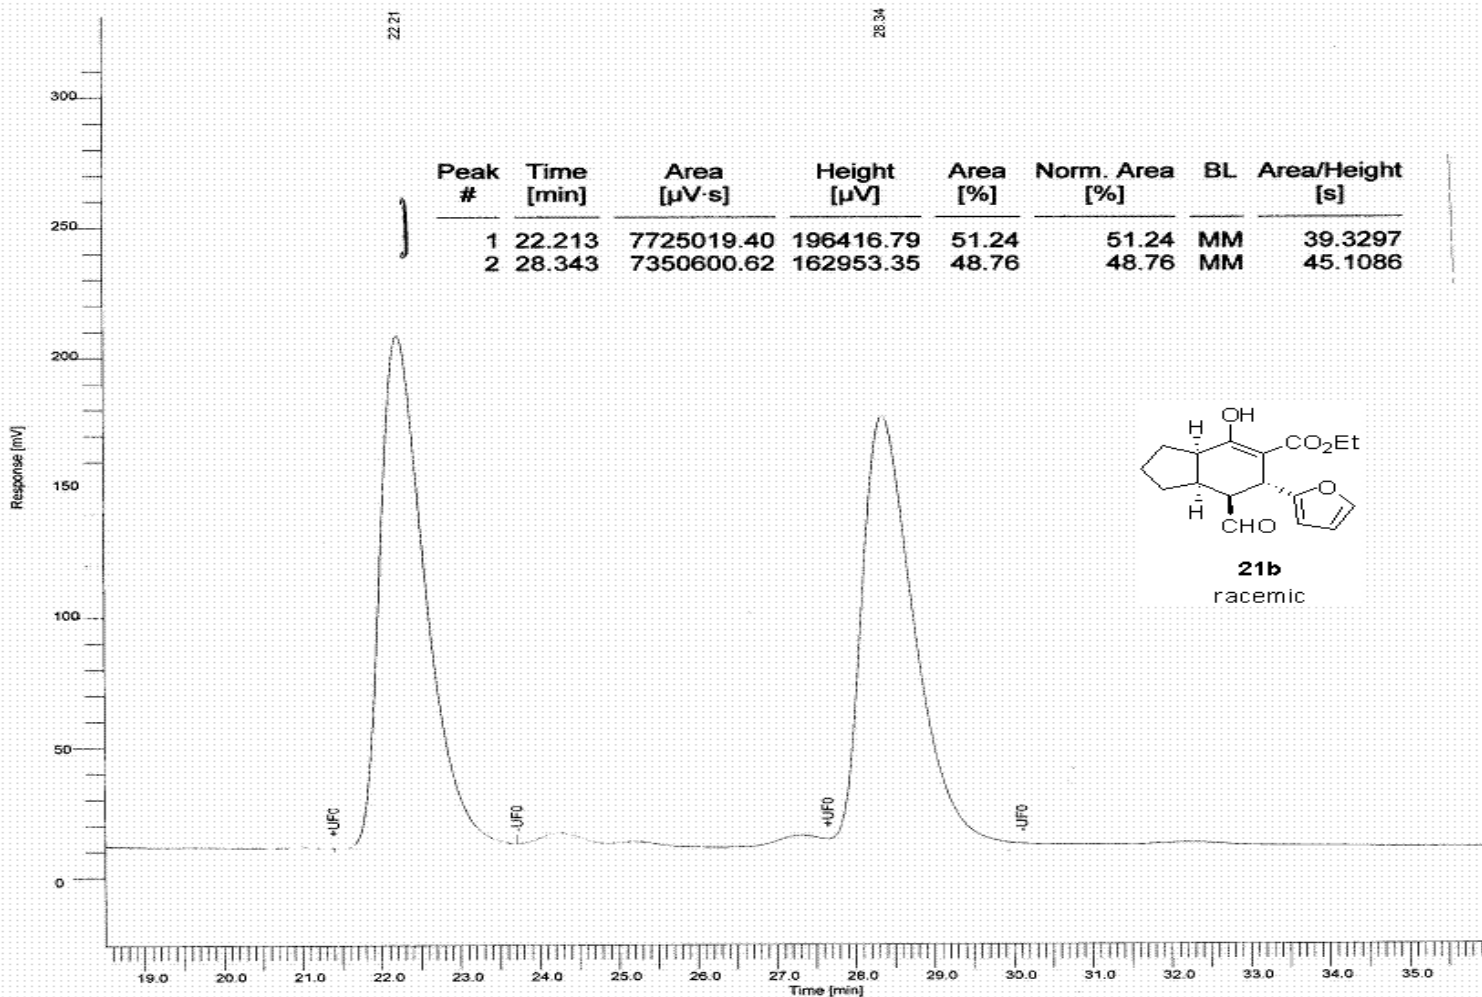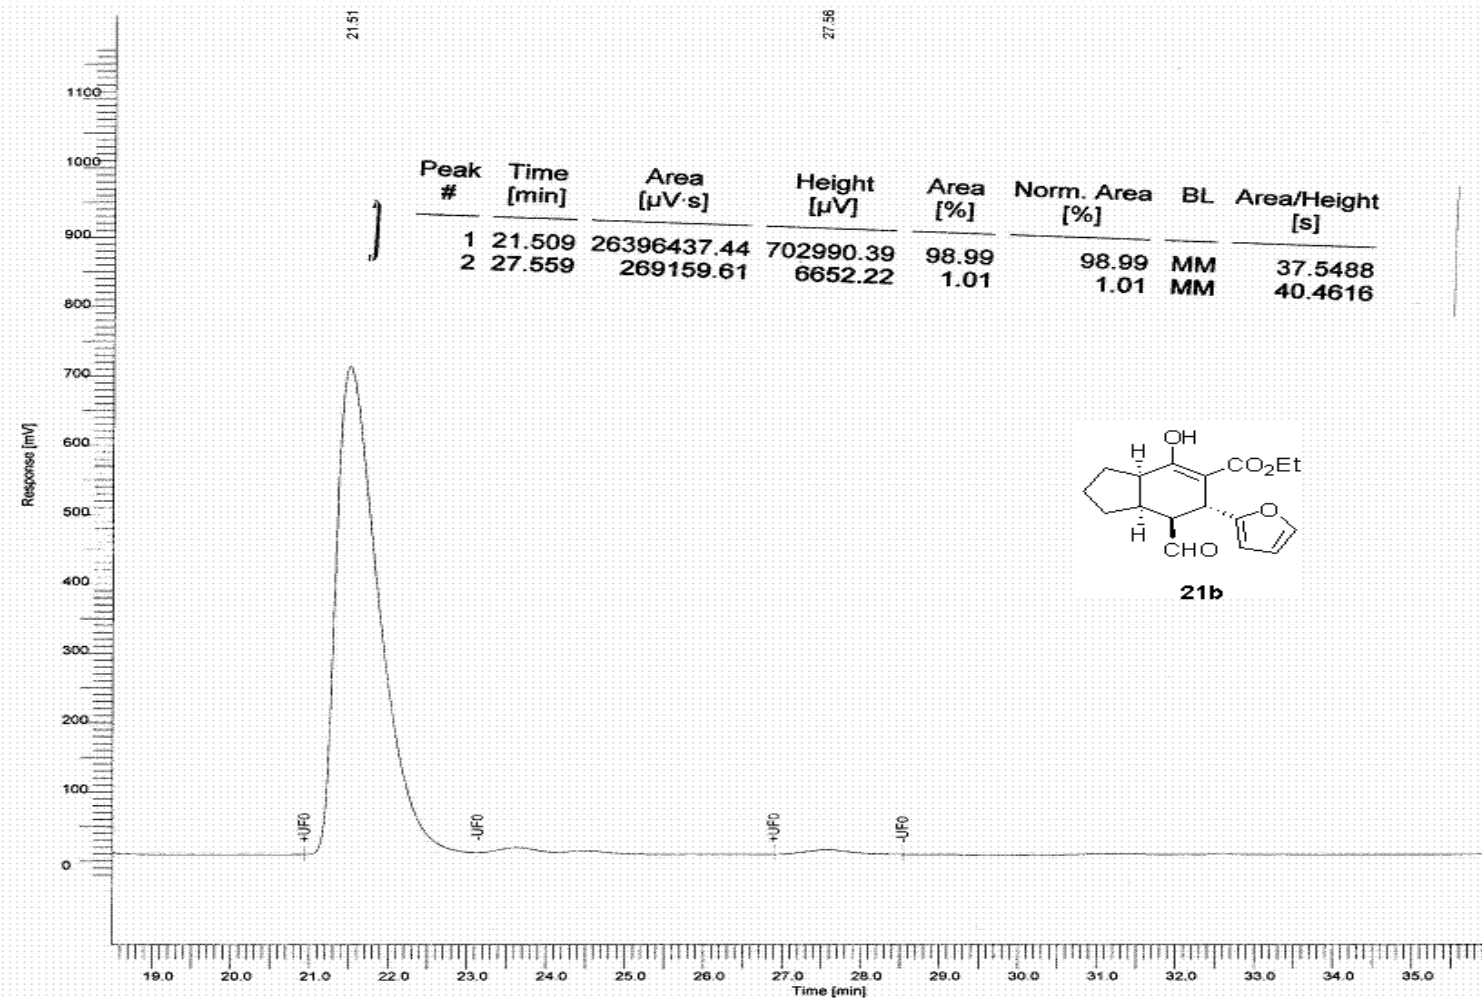

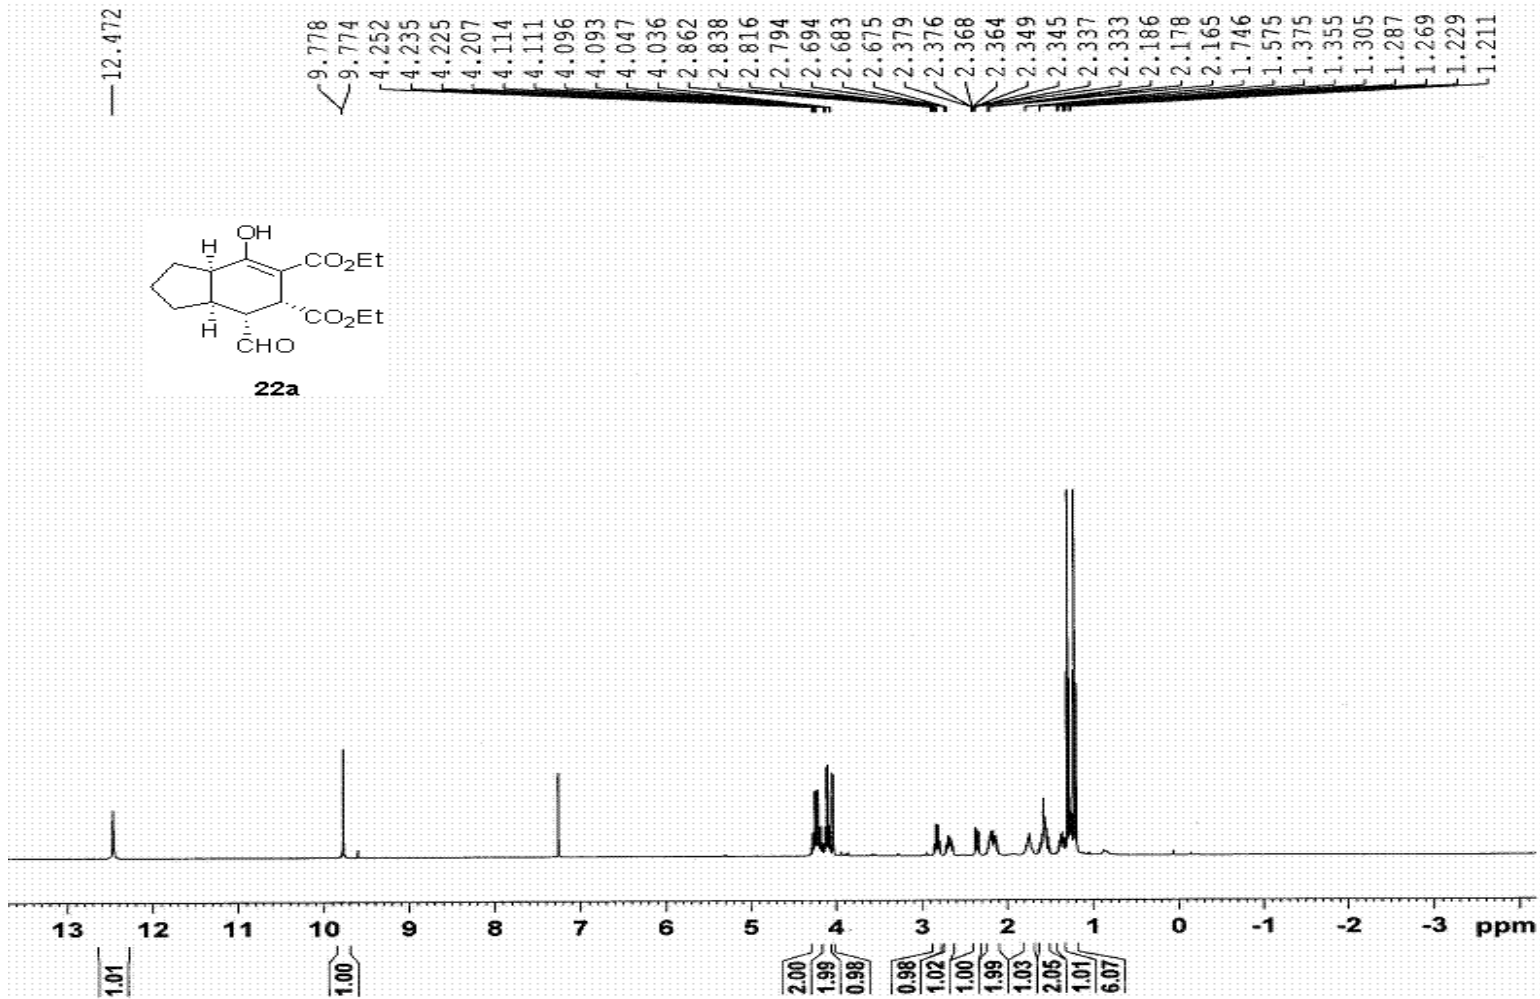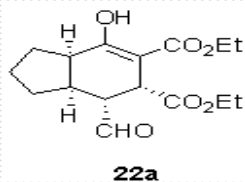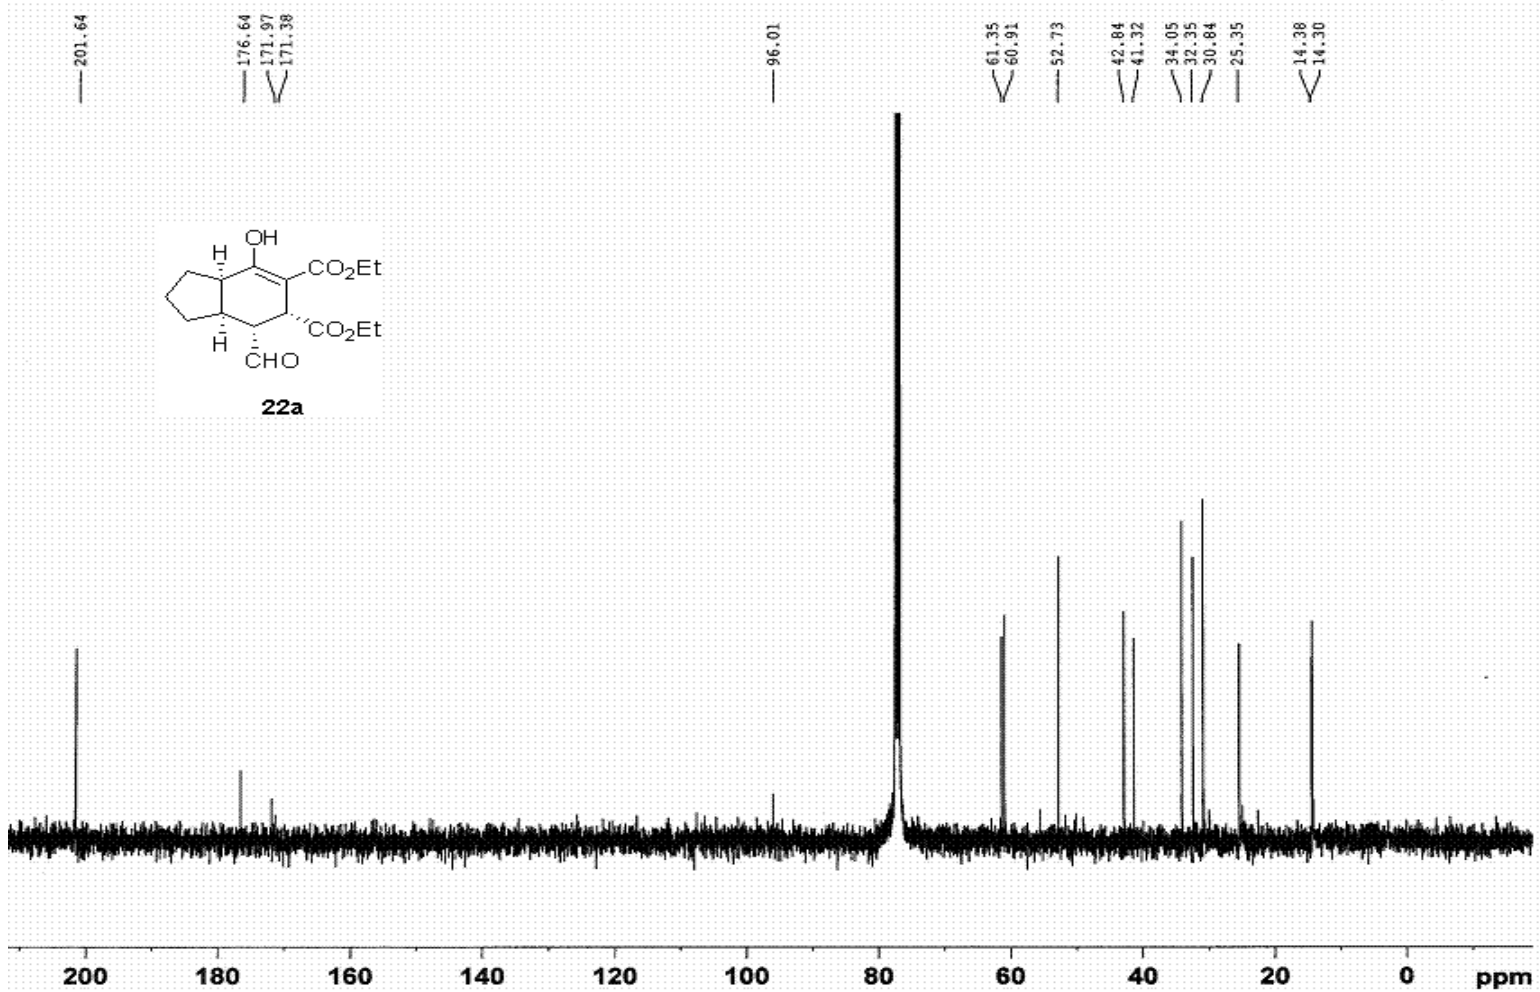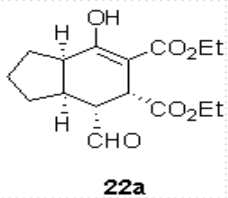

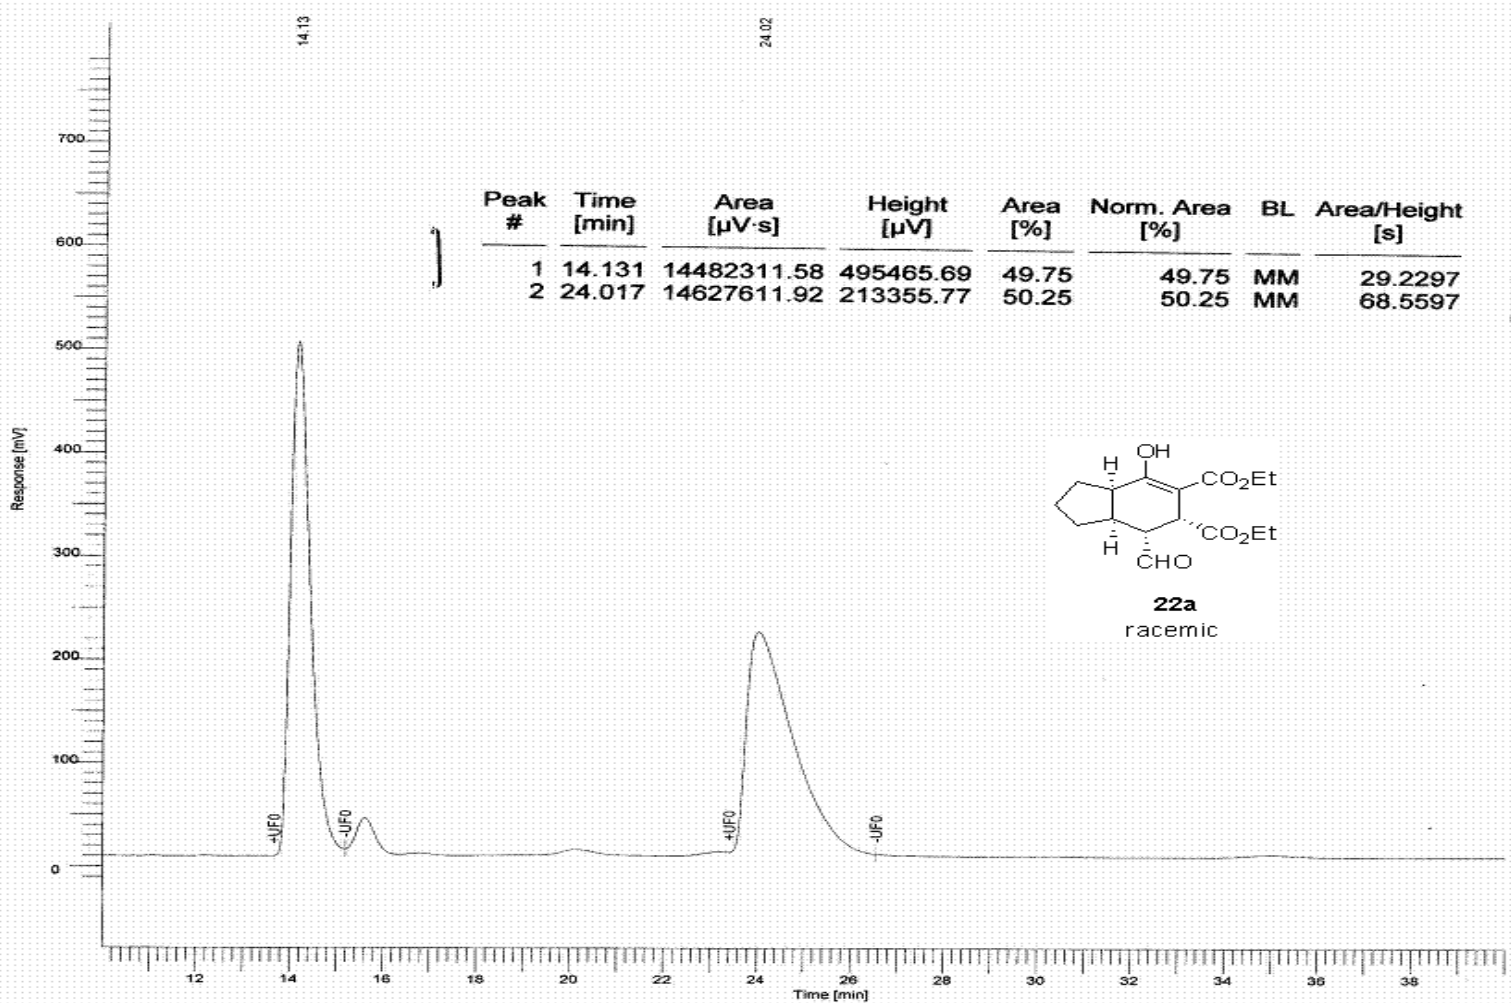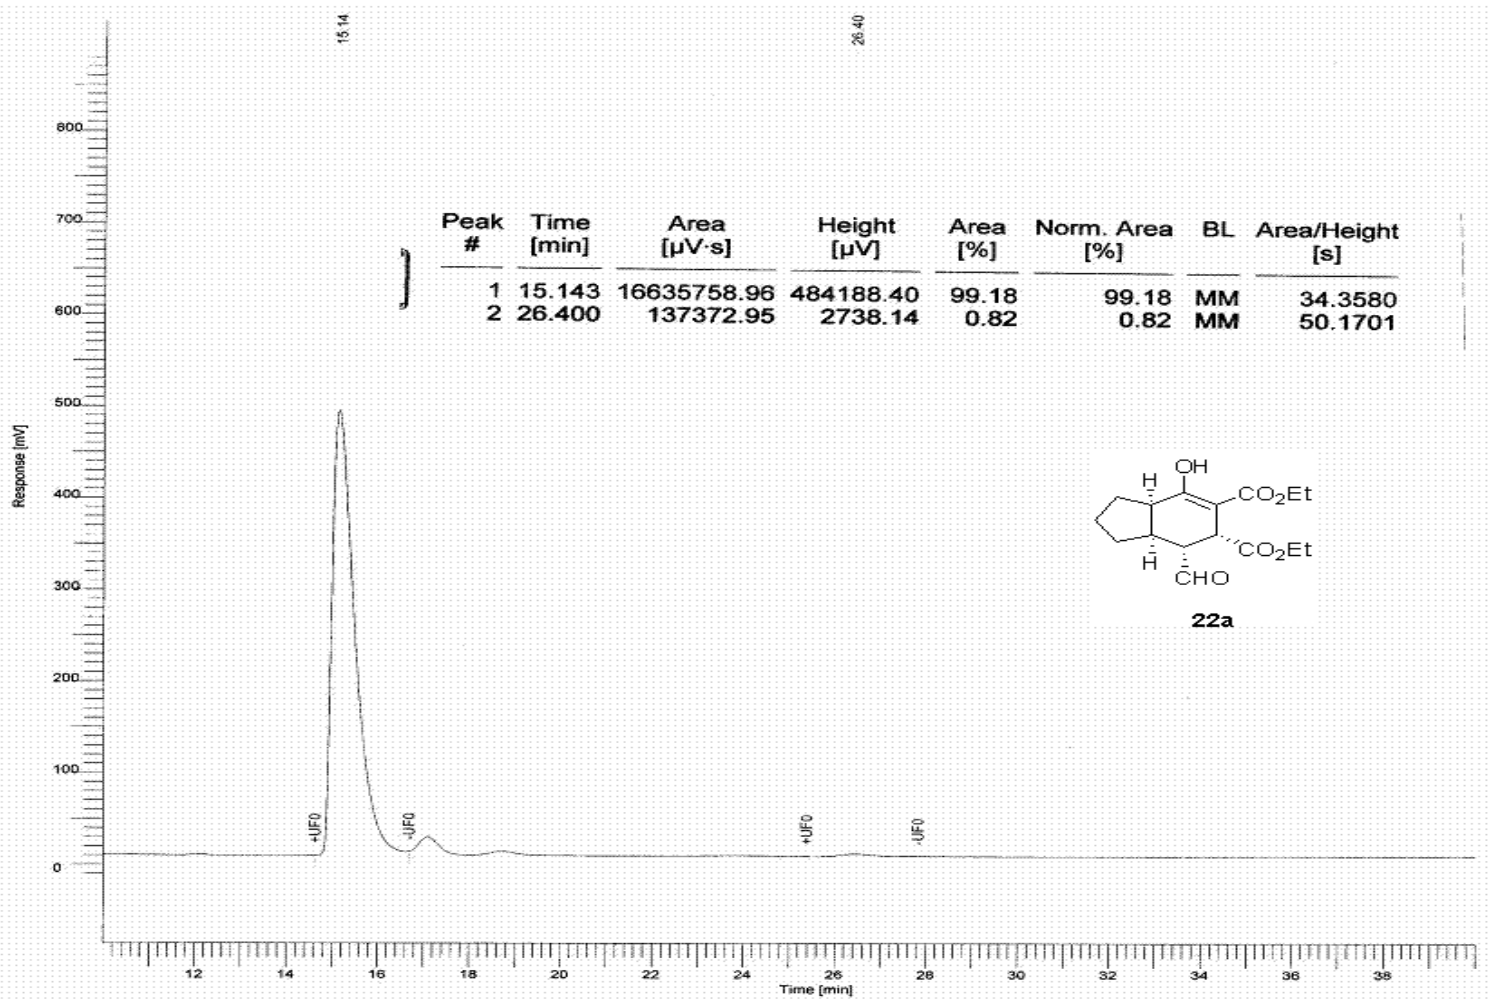

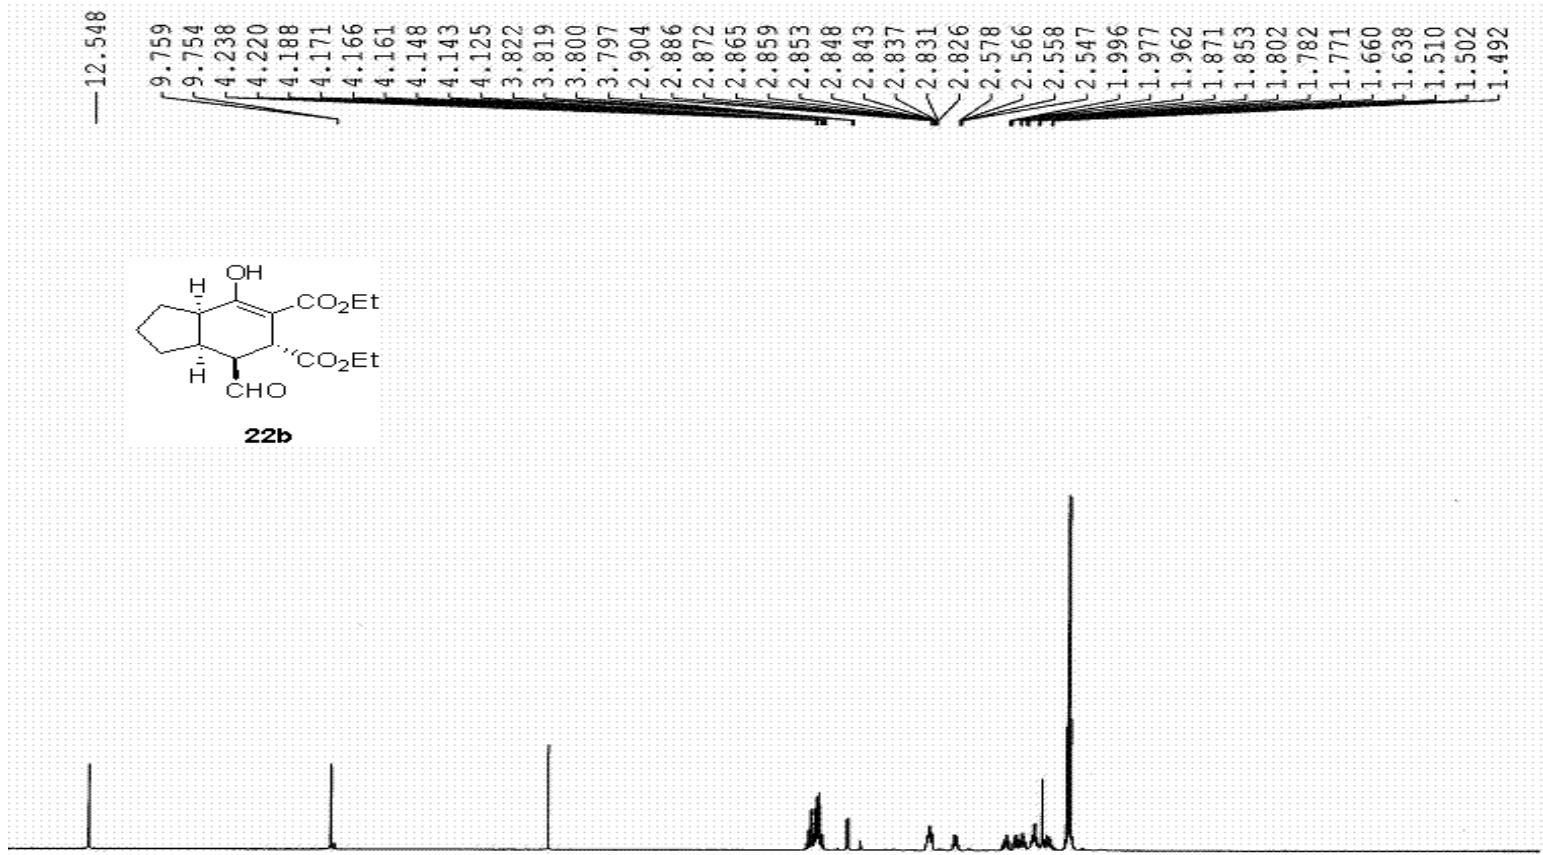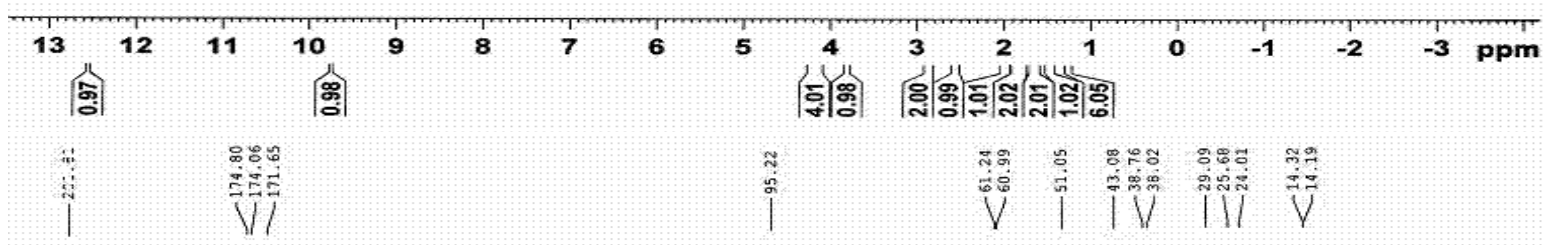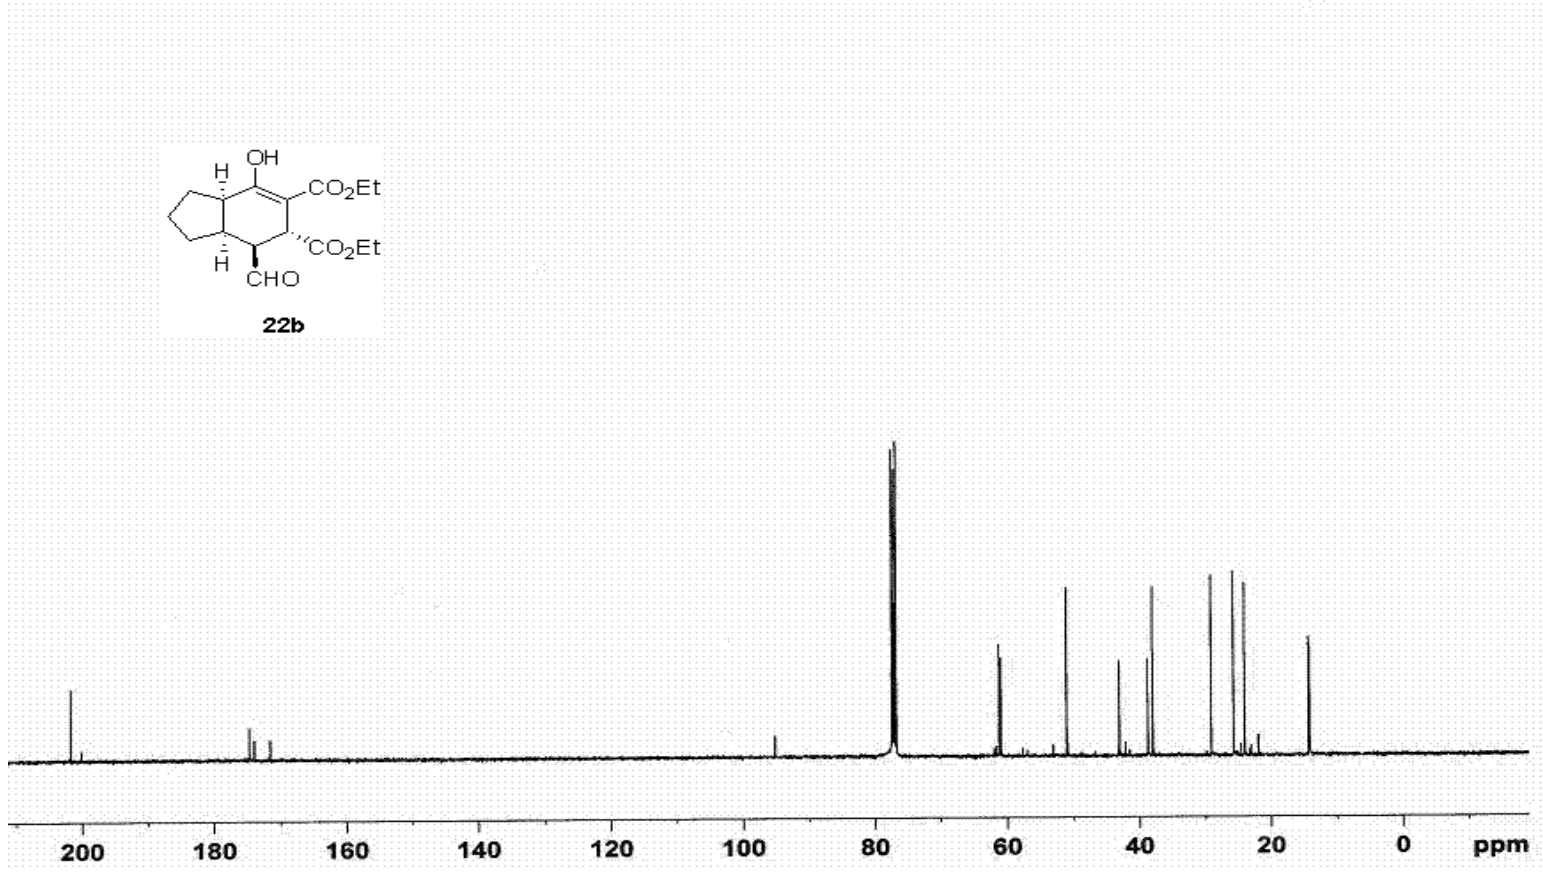

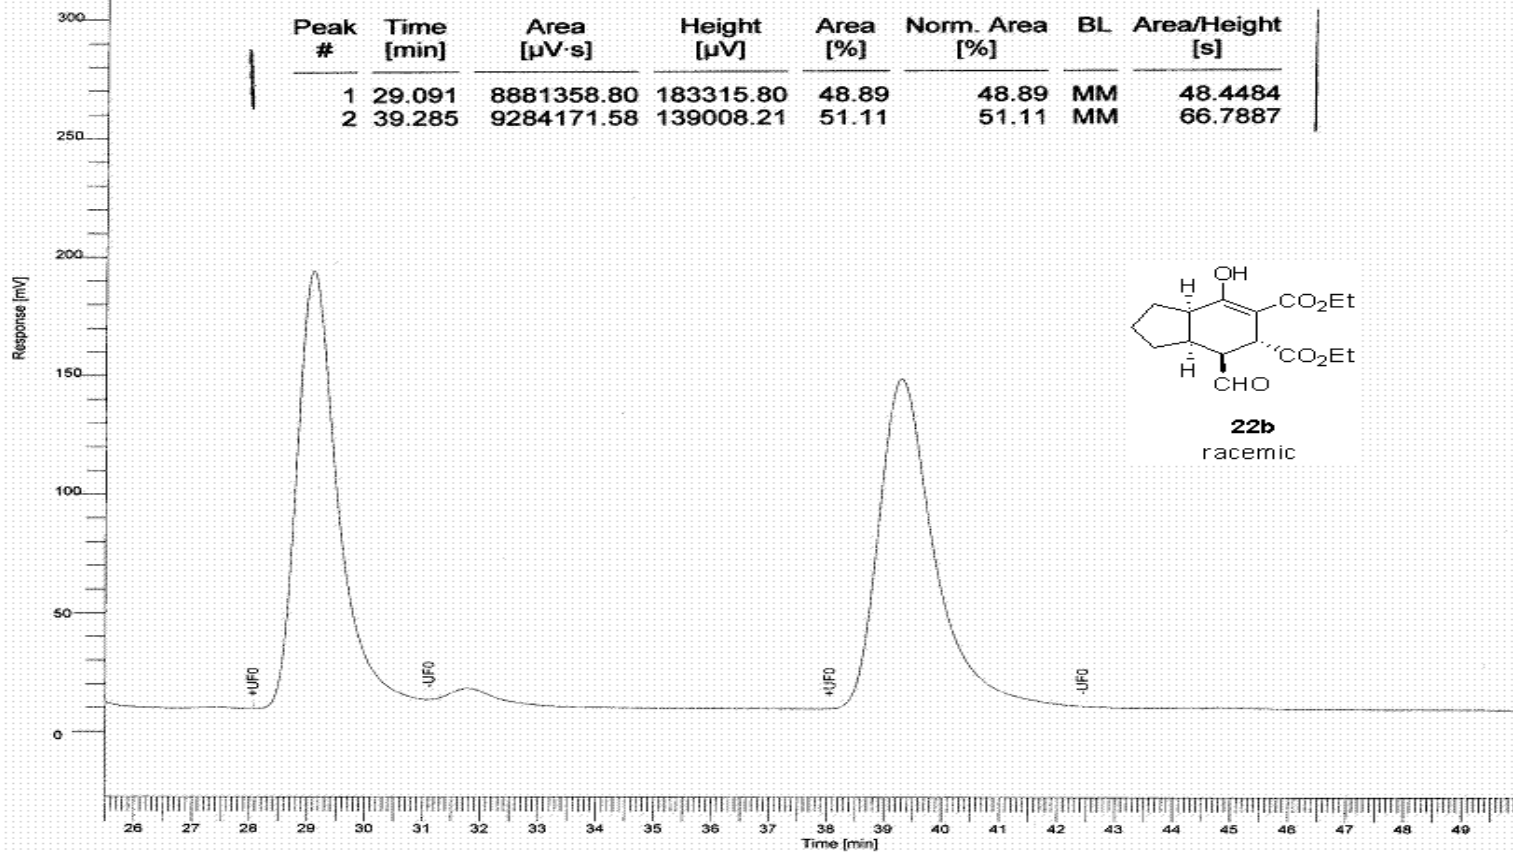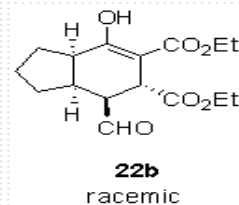

29.23

39.48

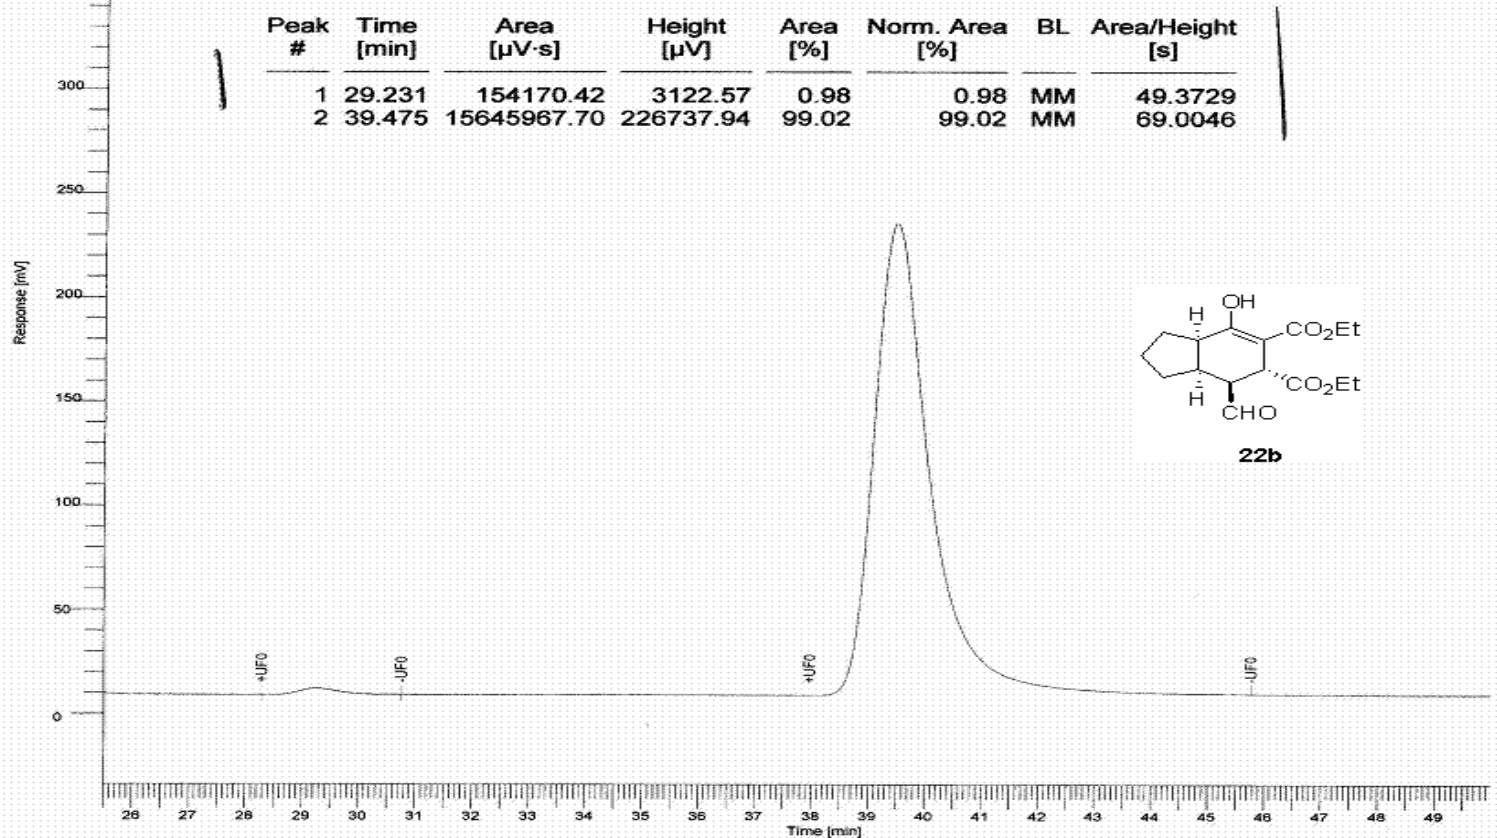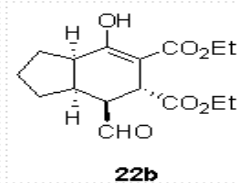

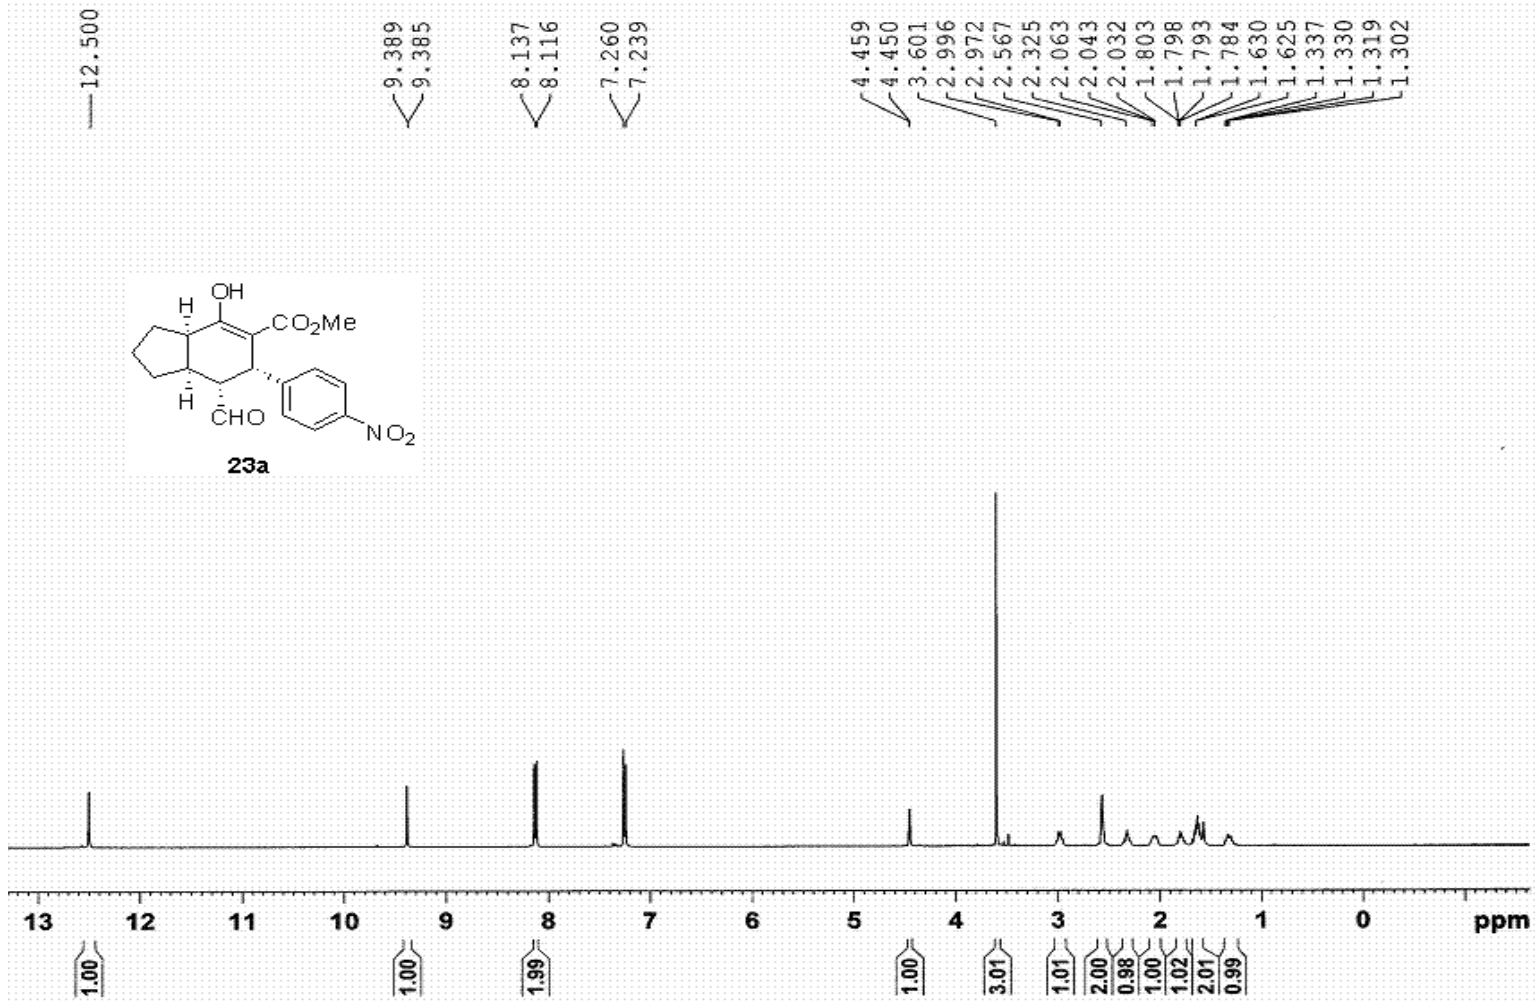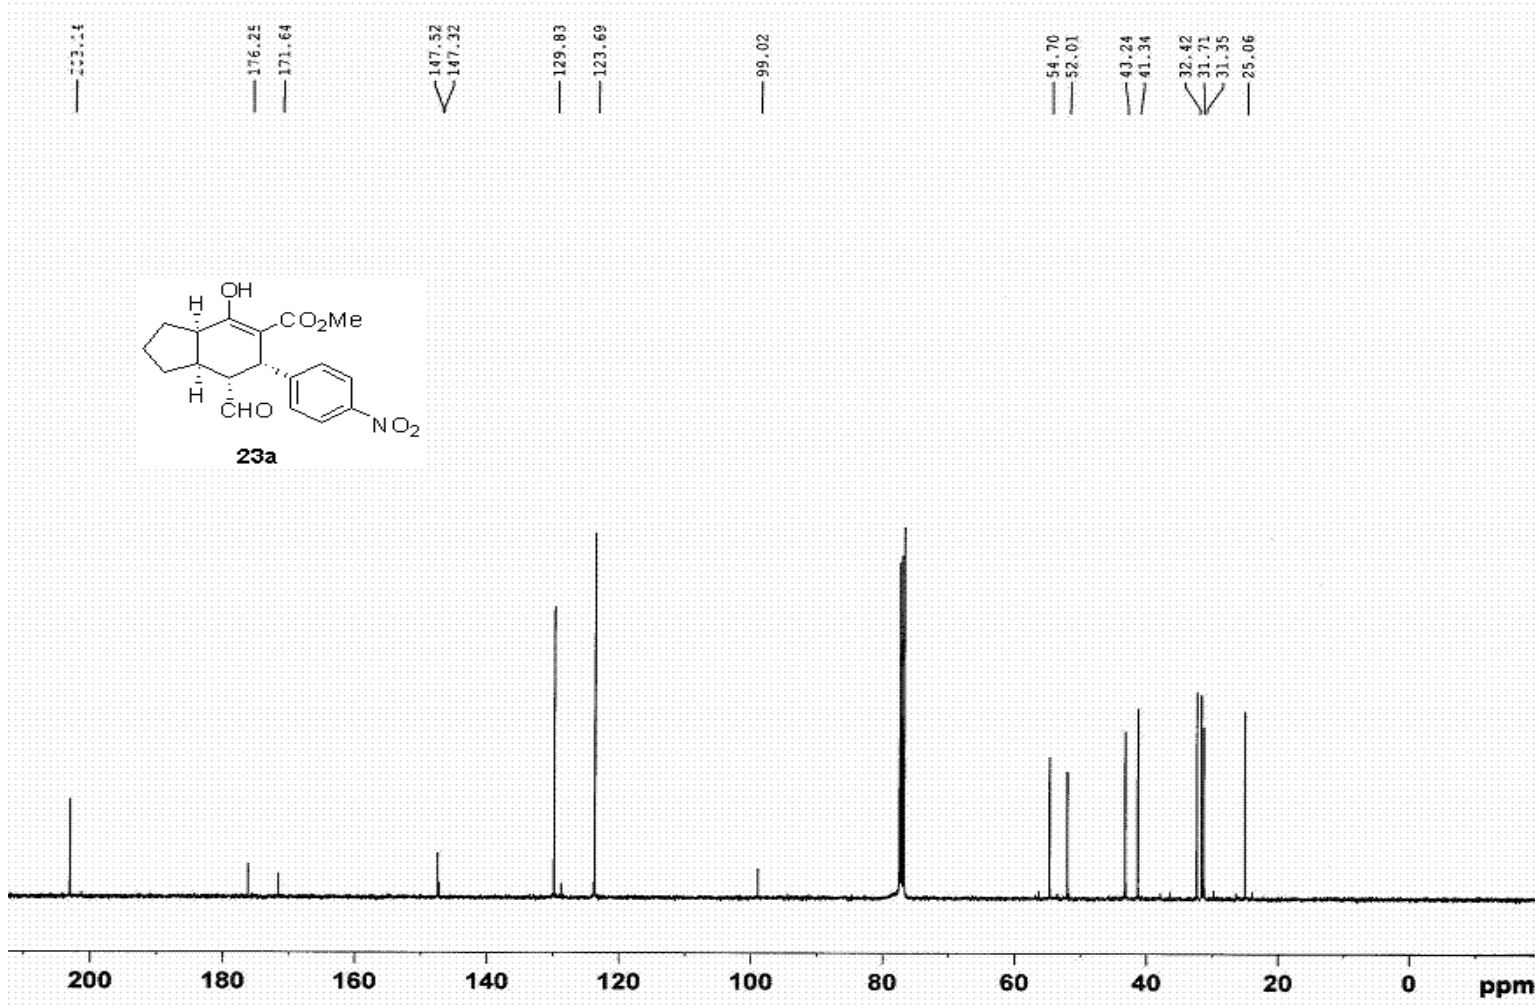

19.56

27.56

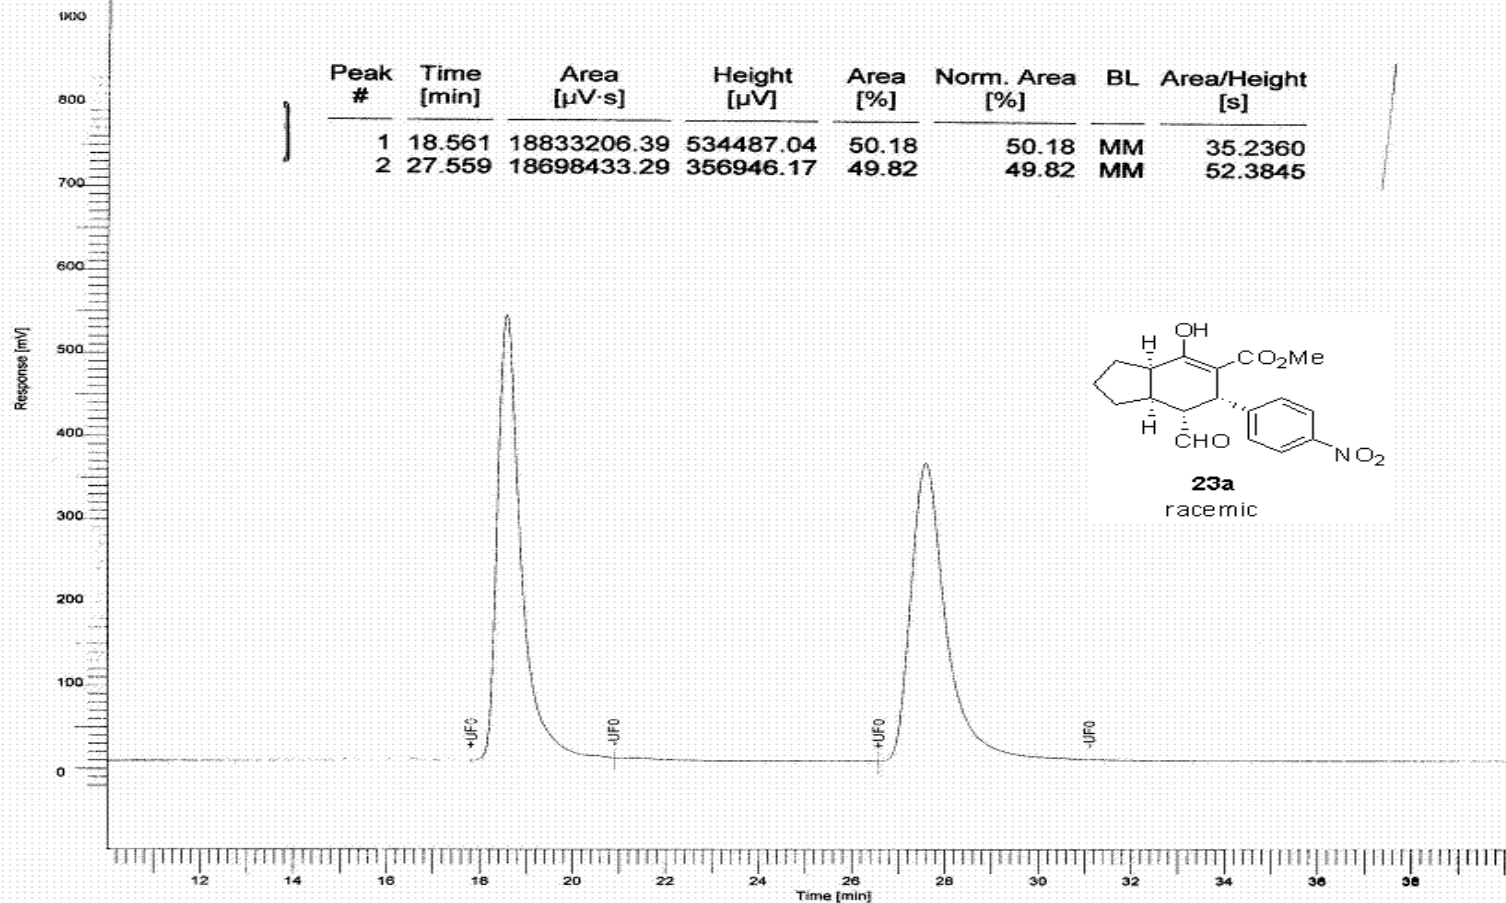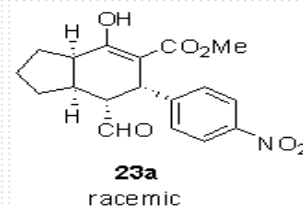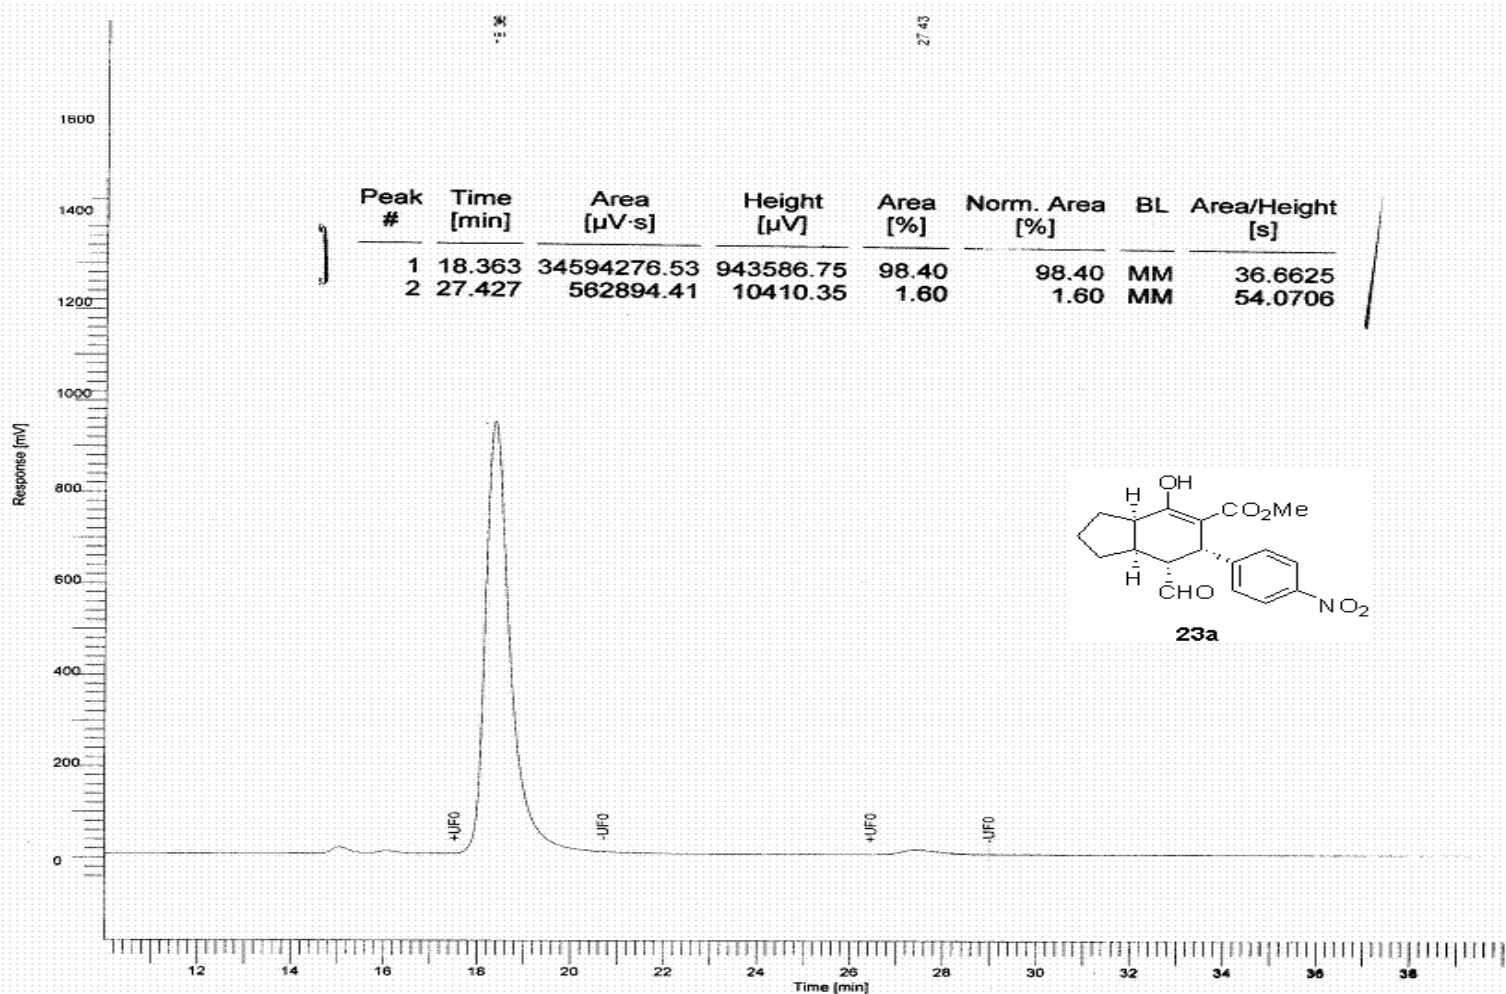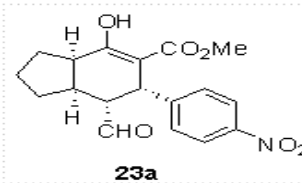

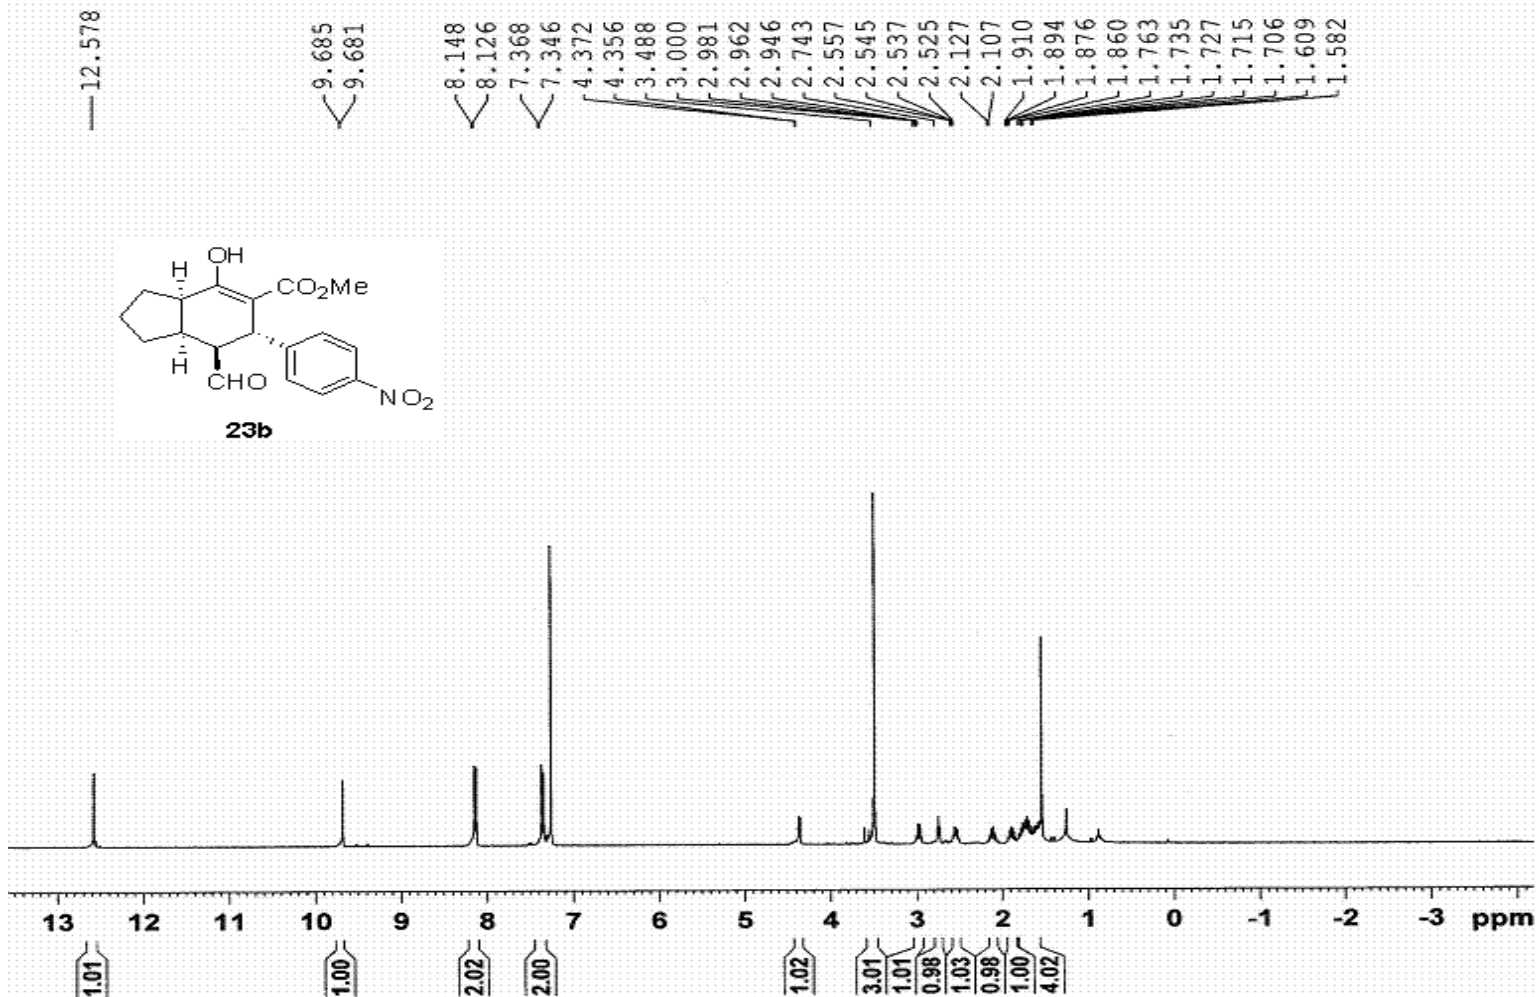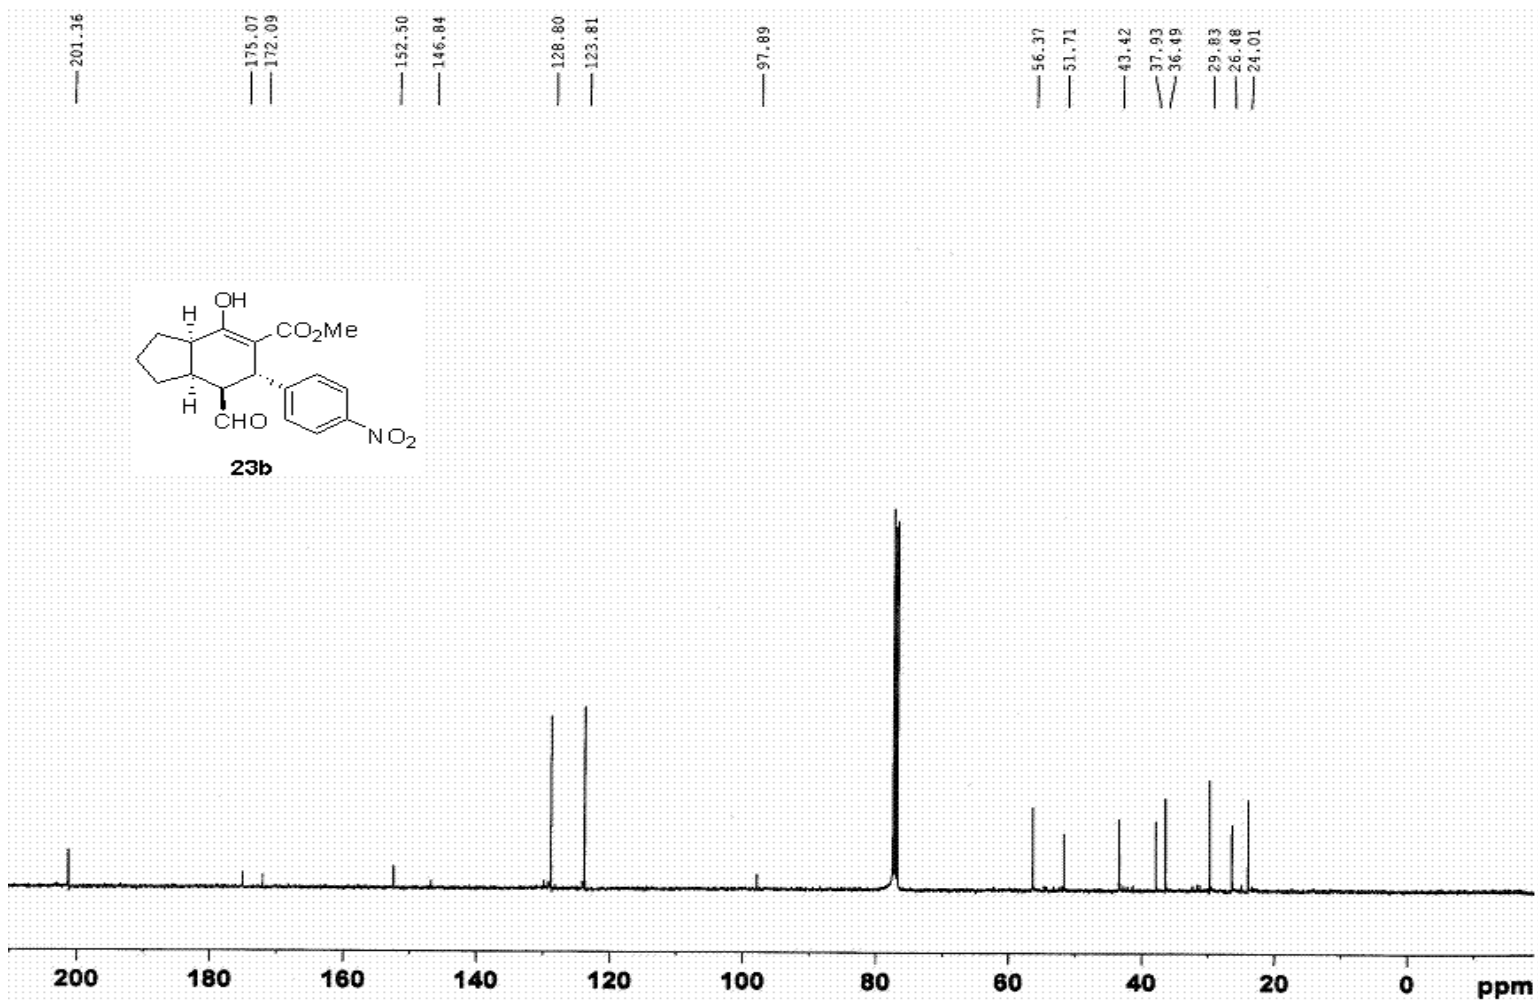



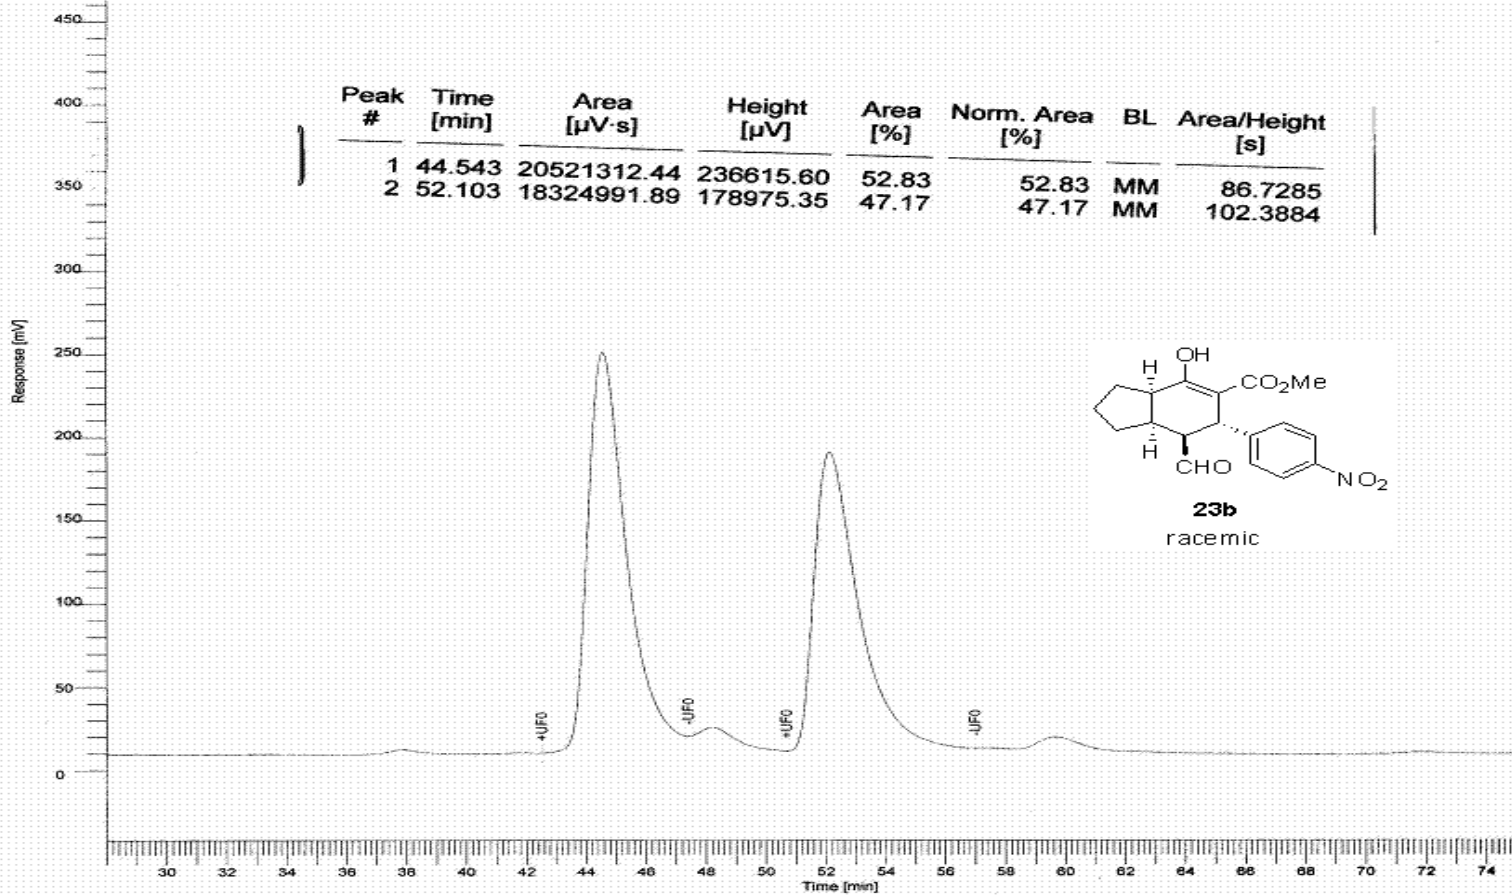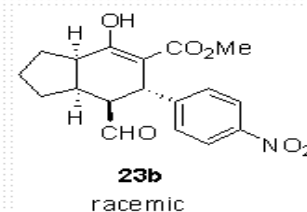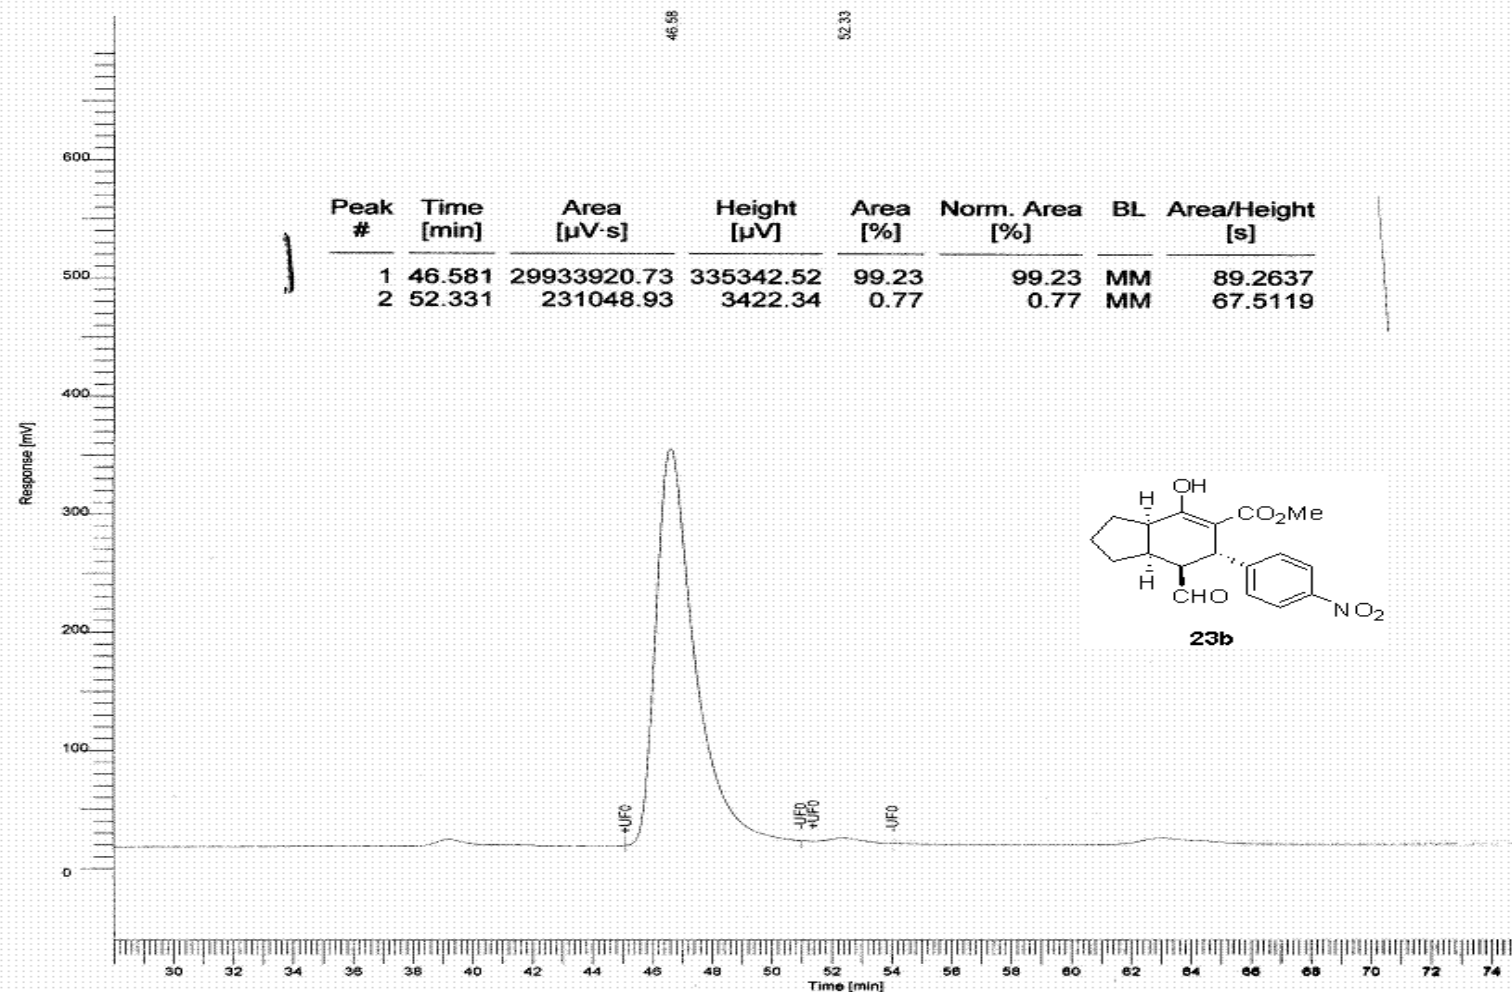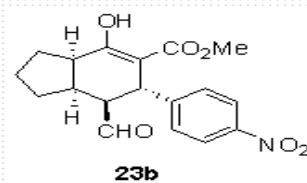

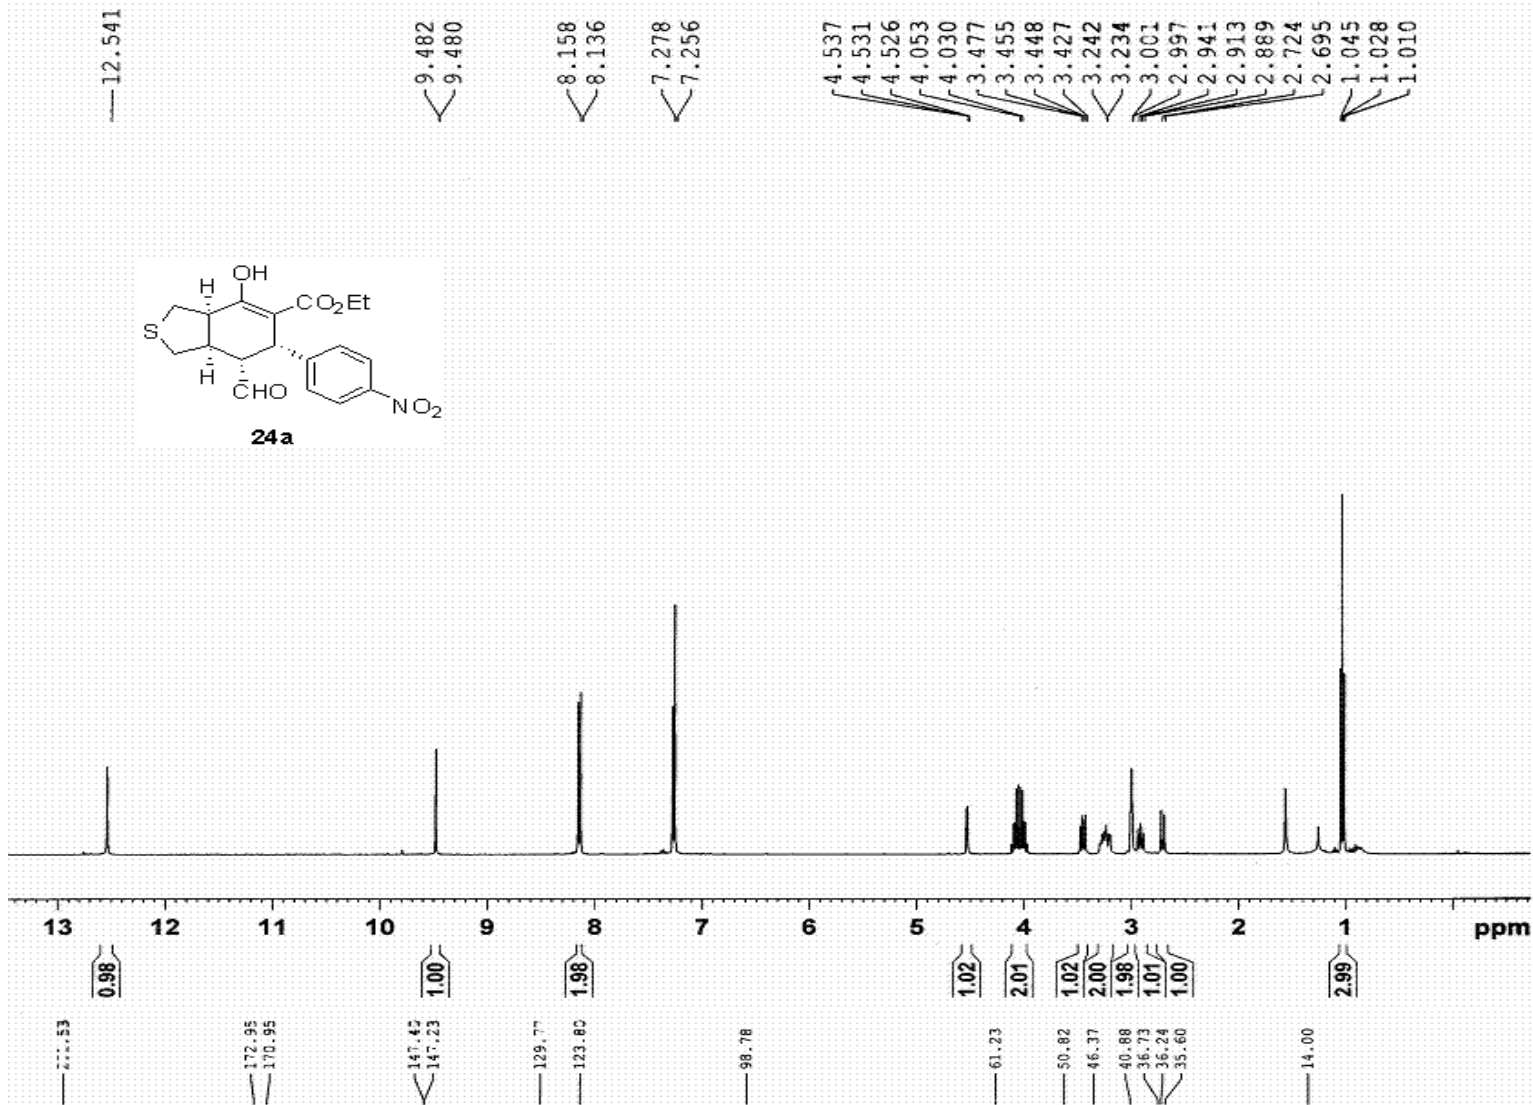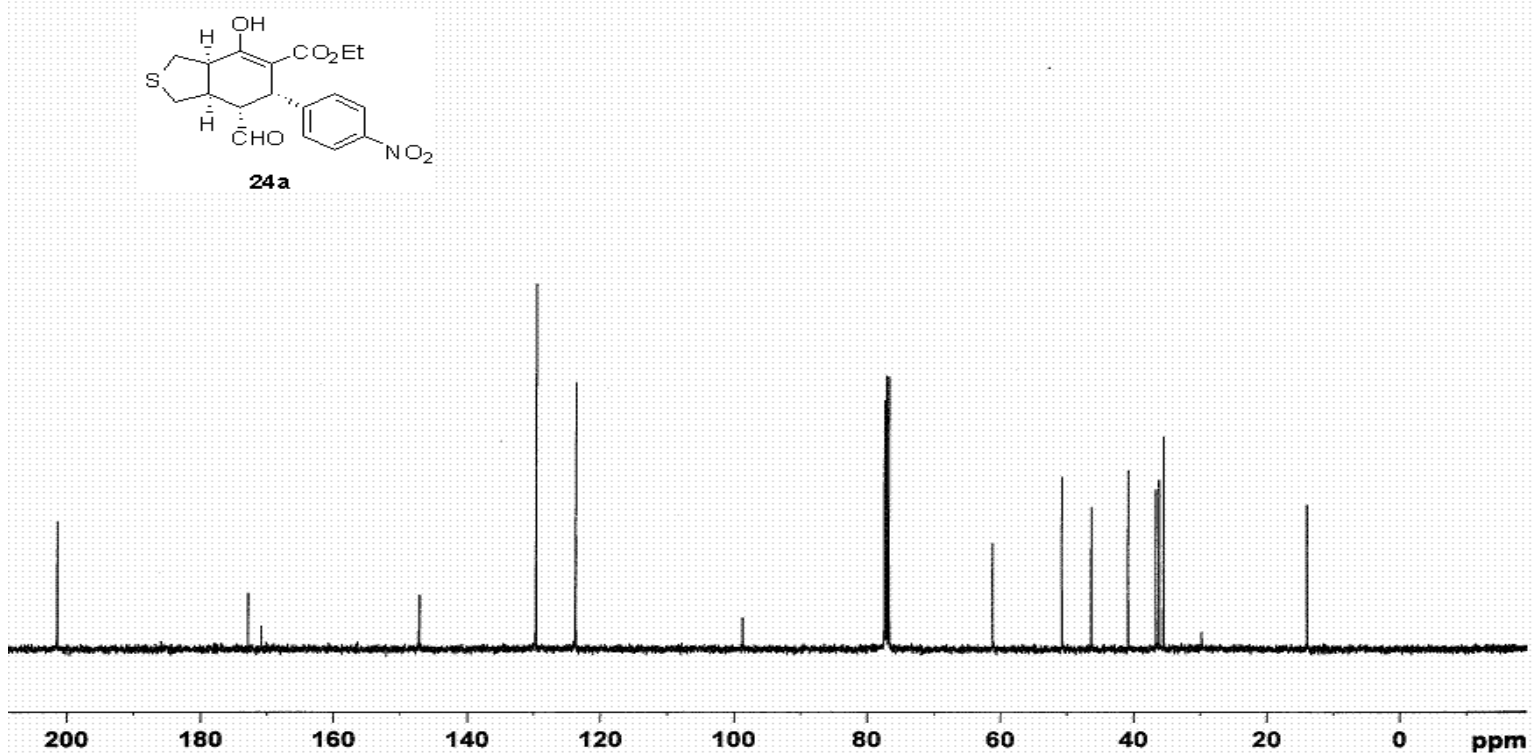

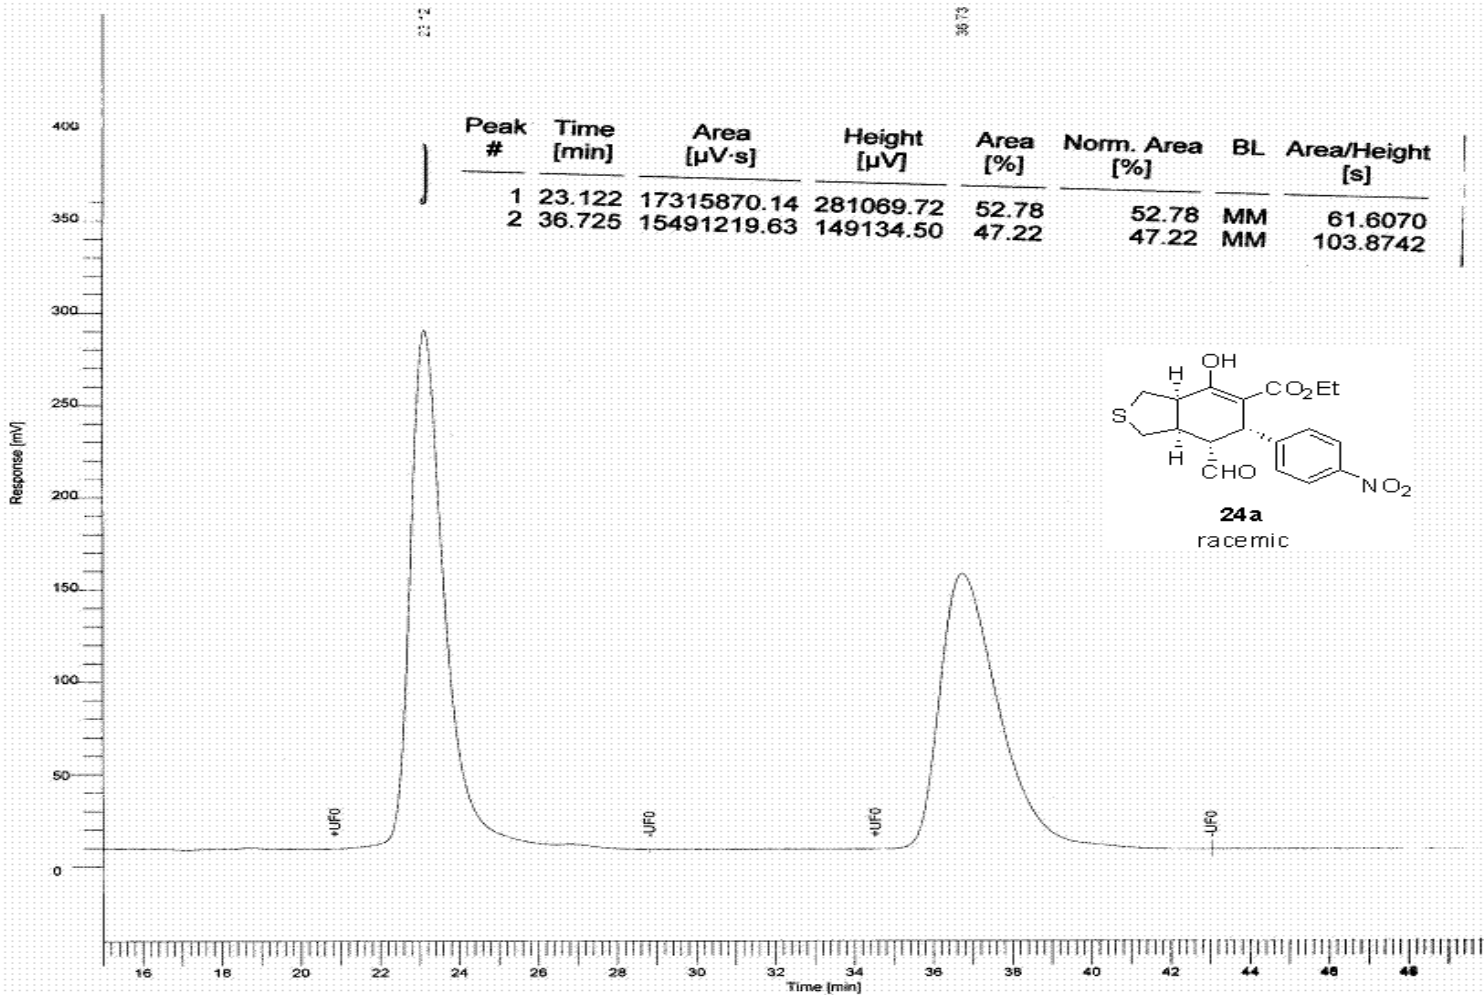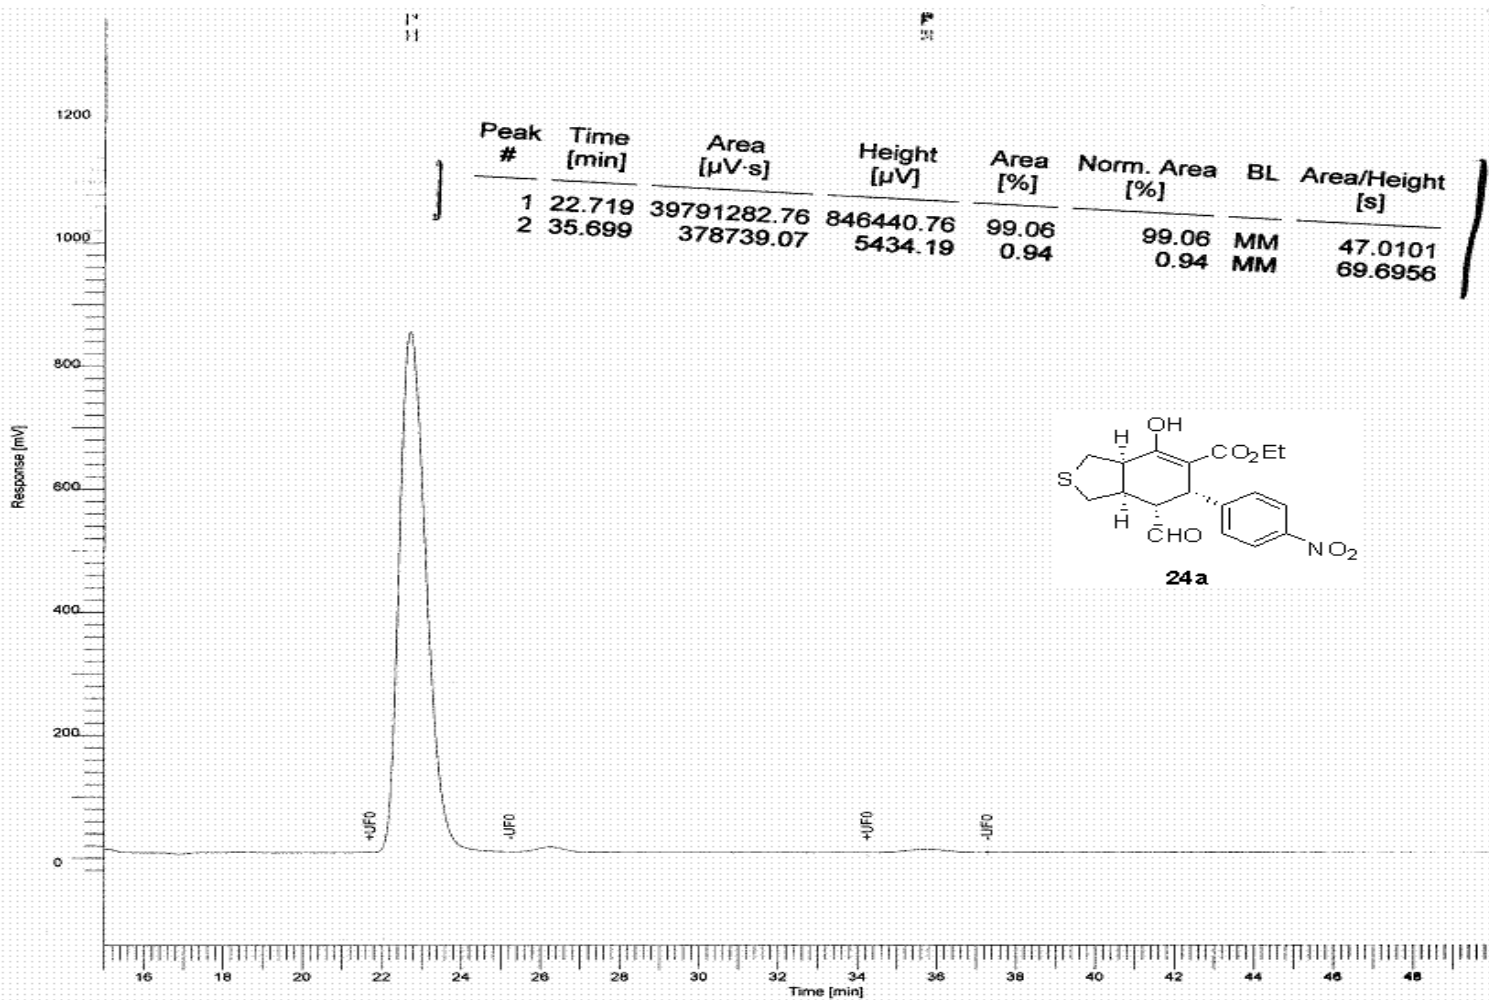

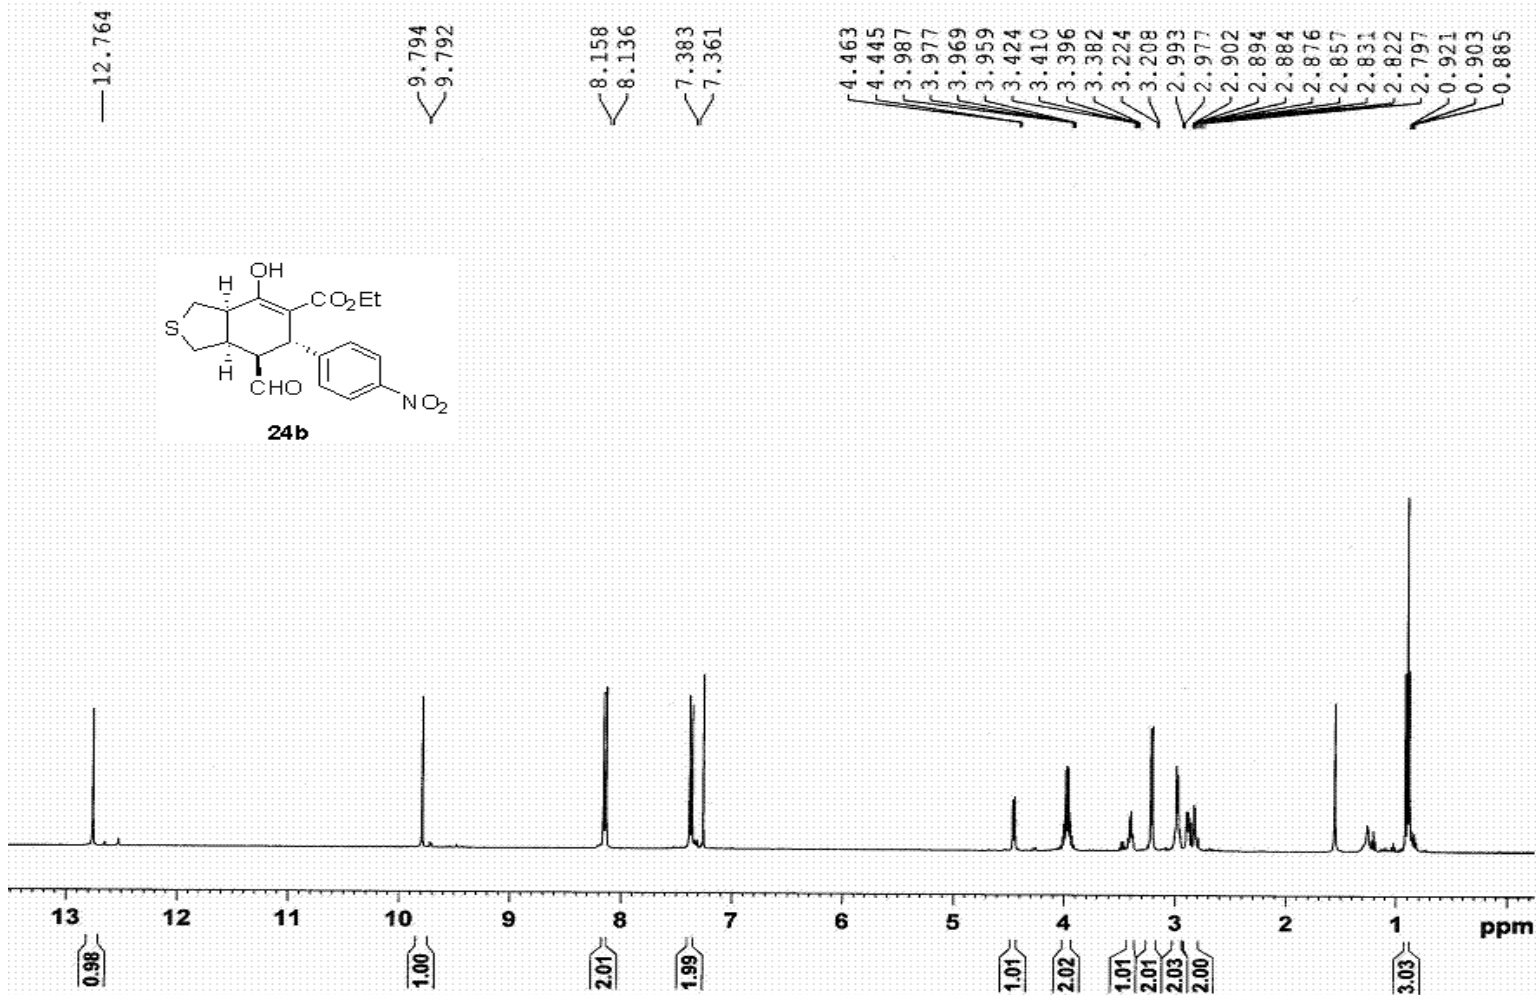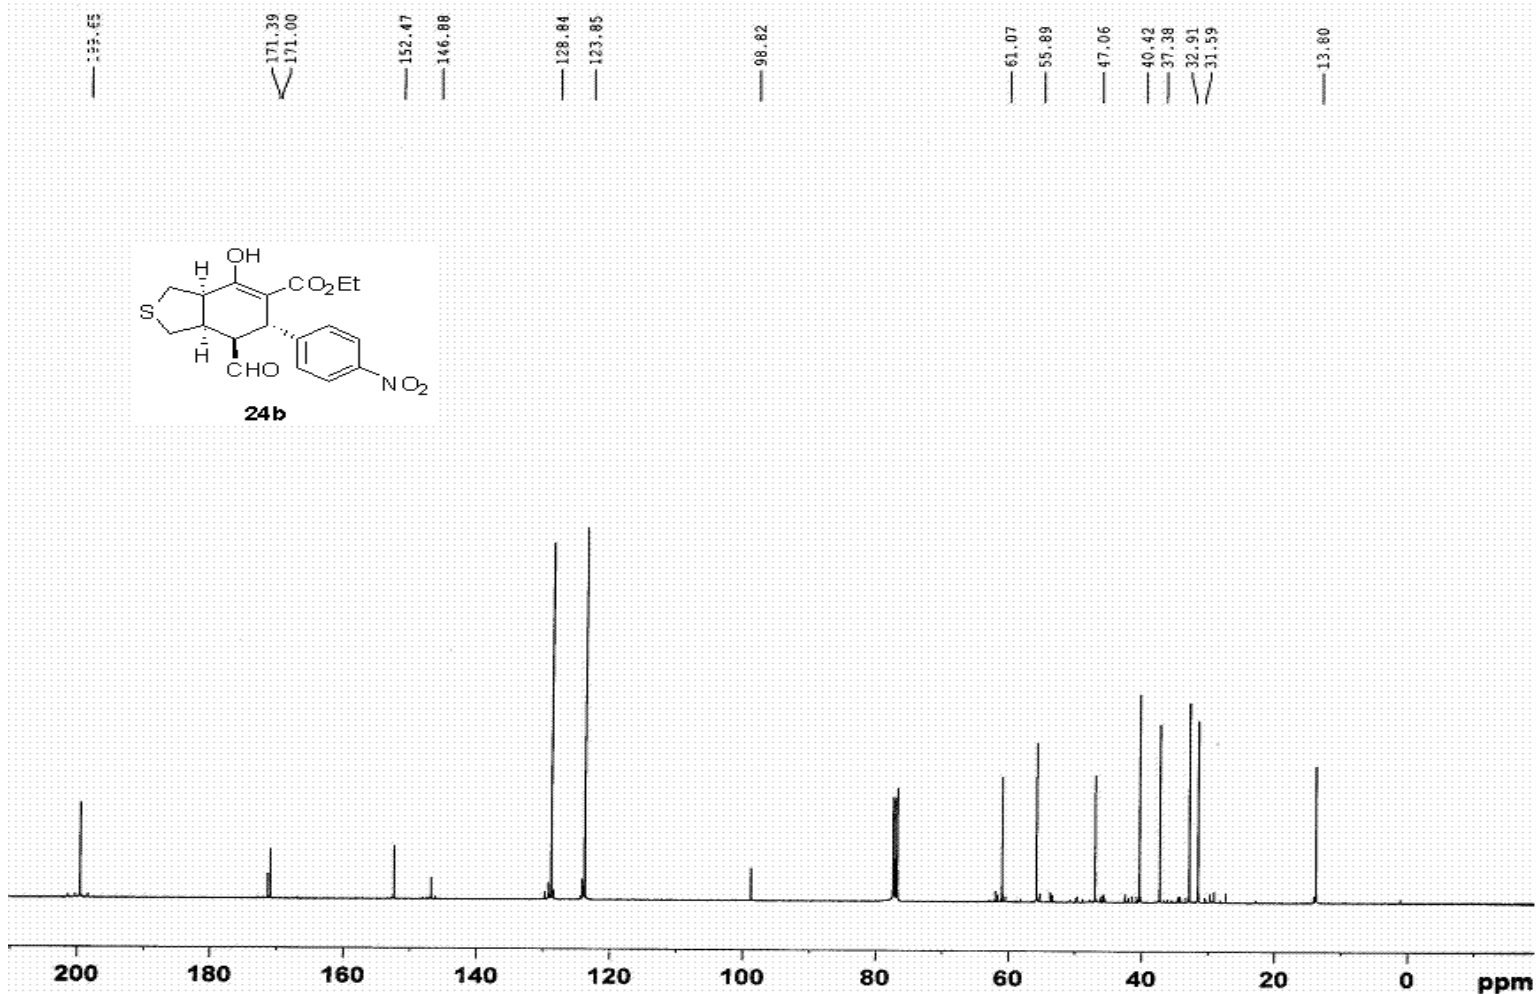

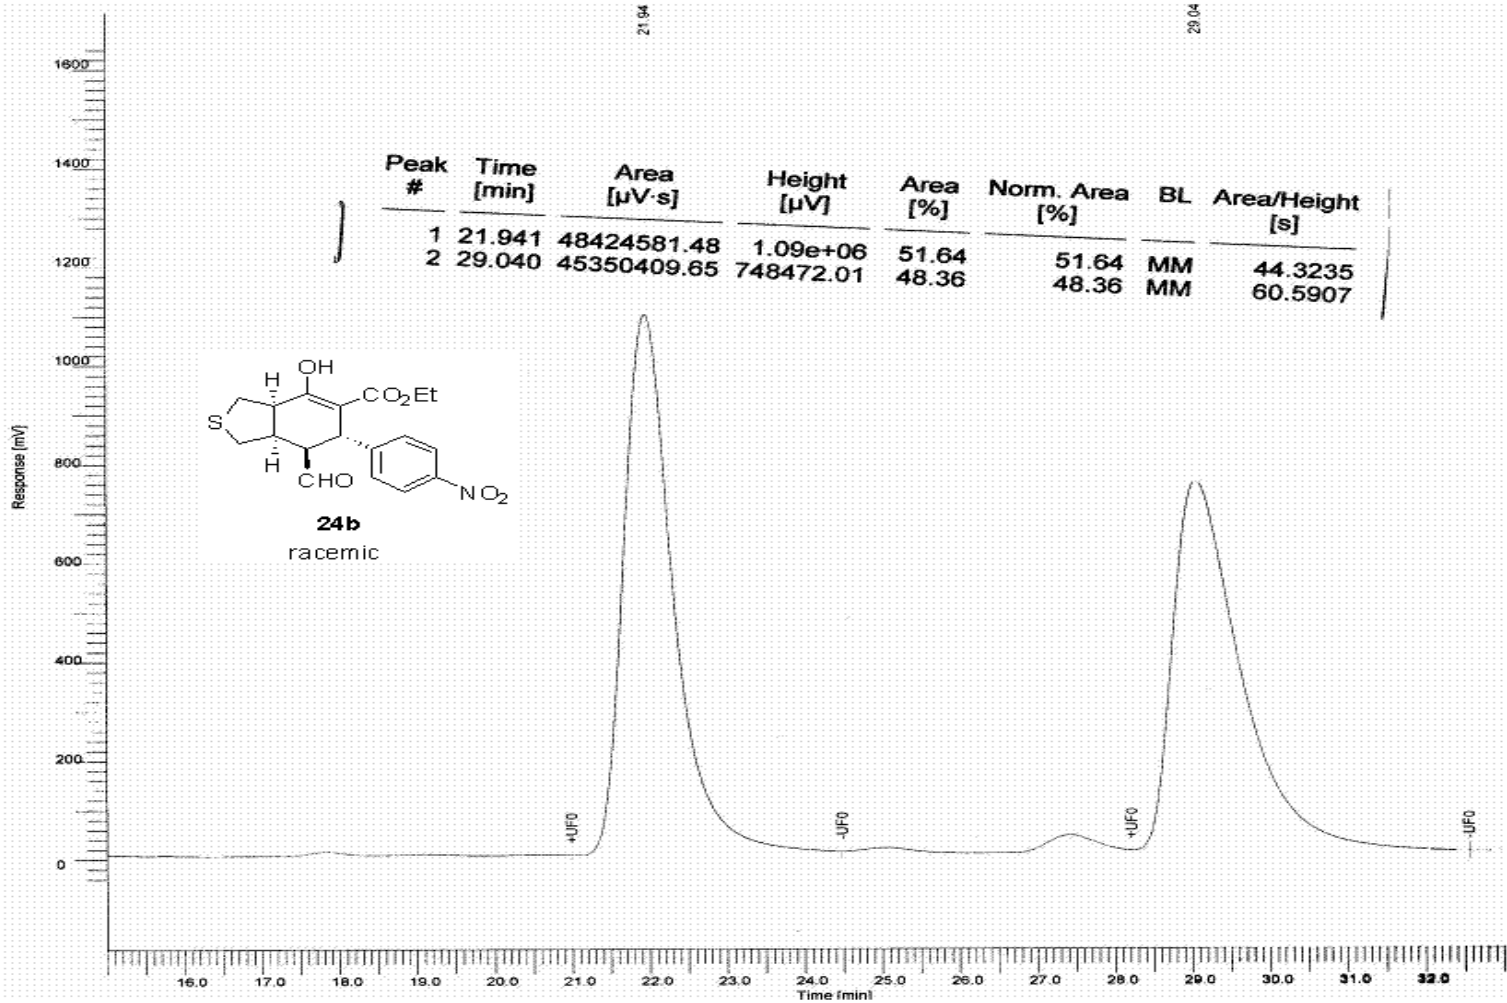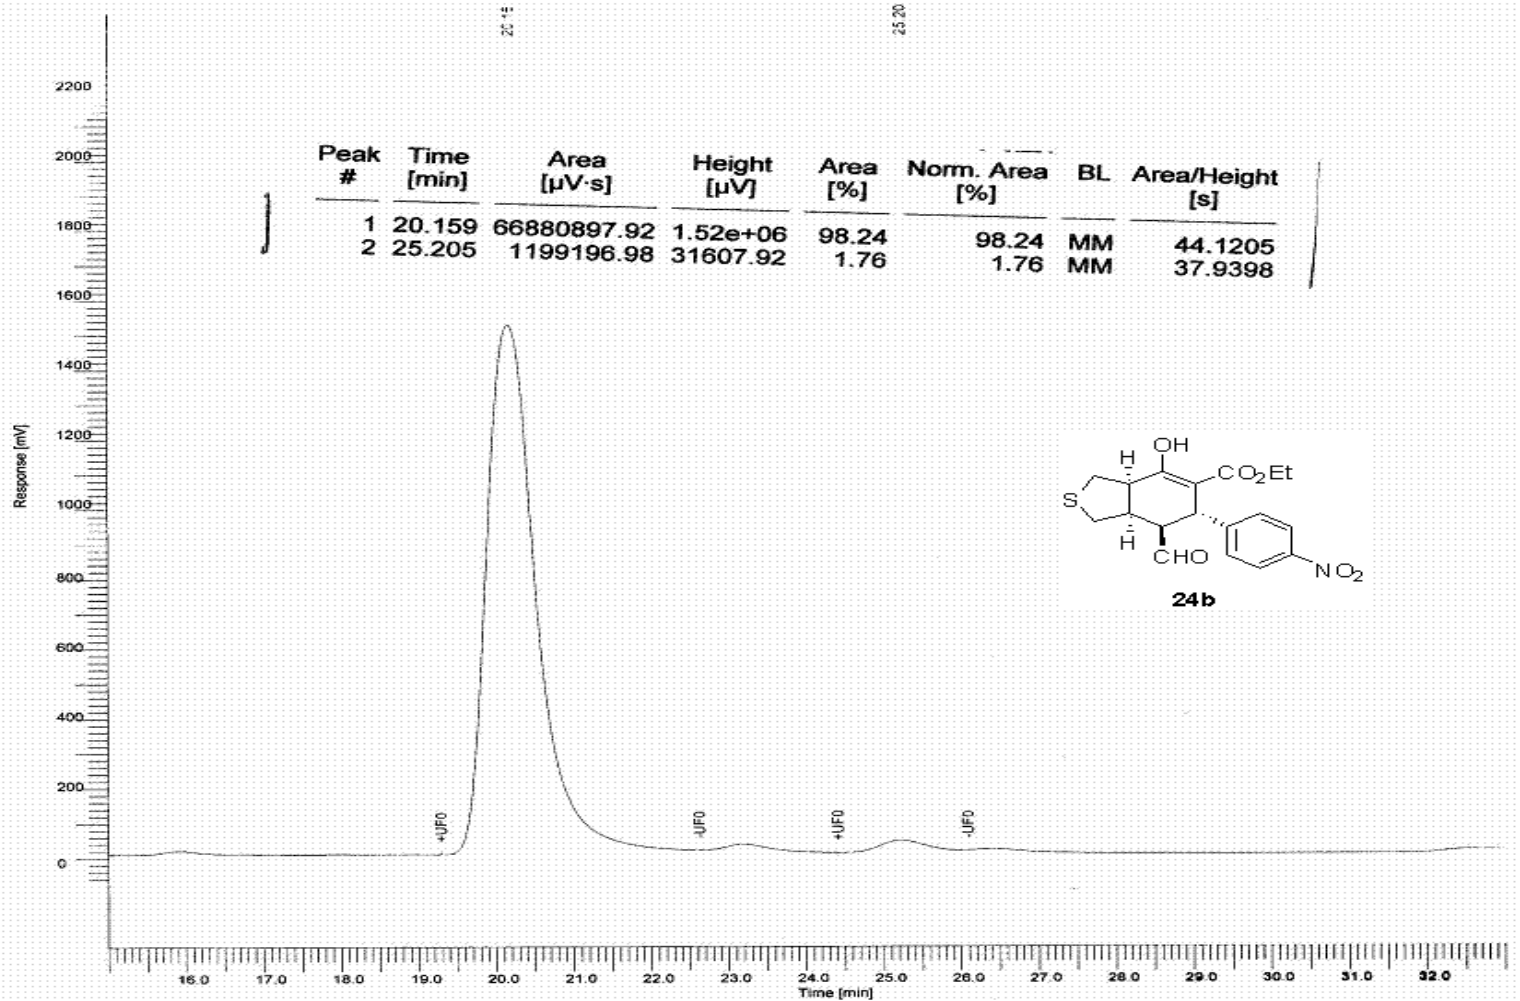

8.115  
8.094

7.426  
7.404

4.157  
4.135  
3.895  
3.877  
3.868  
3.850  
3.744  
3.726  
3.717  
3.699  
3.663  
3.655  
3.635  
3.627  
3.328  
3.321  
3.300  
3.294  
2.534  
2.513  
2.493  
2.473  
2.389  
2.380  
2.370  
2.362  
2.169  
2.149  
2.127  
1.748  
1.737  
1.722  
1.600  
1.581  
1.564  
1.537  
1.512  
0.943  
0.875

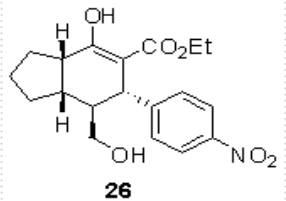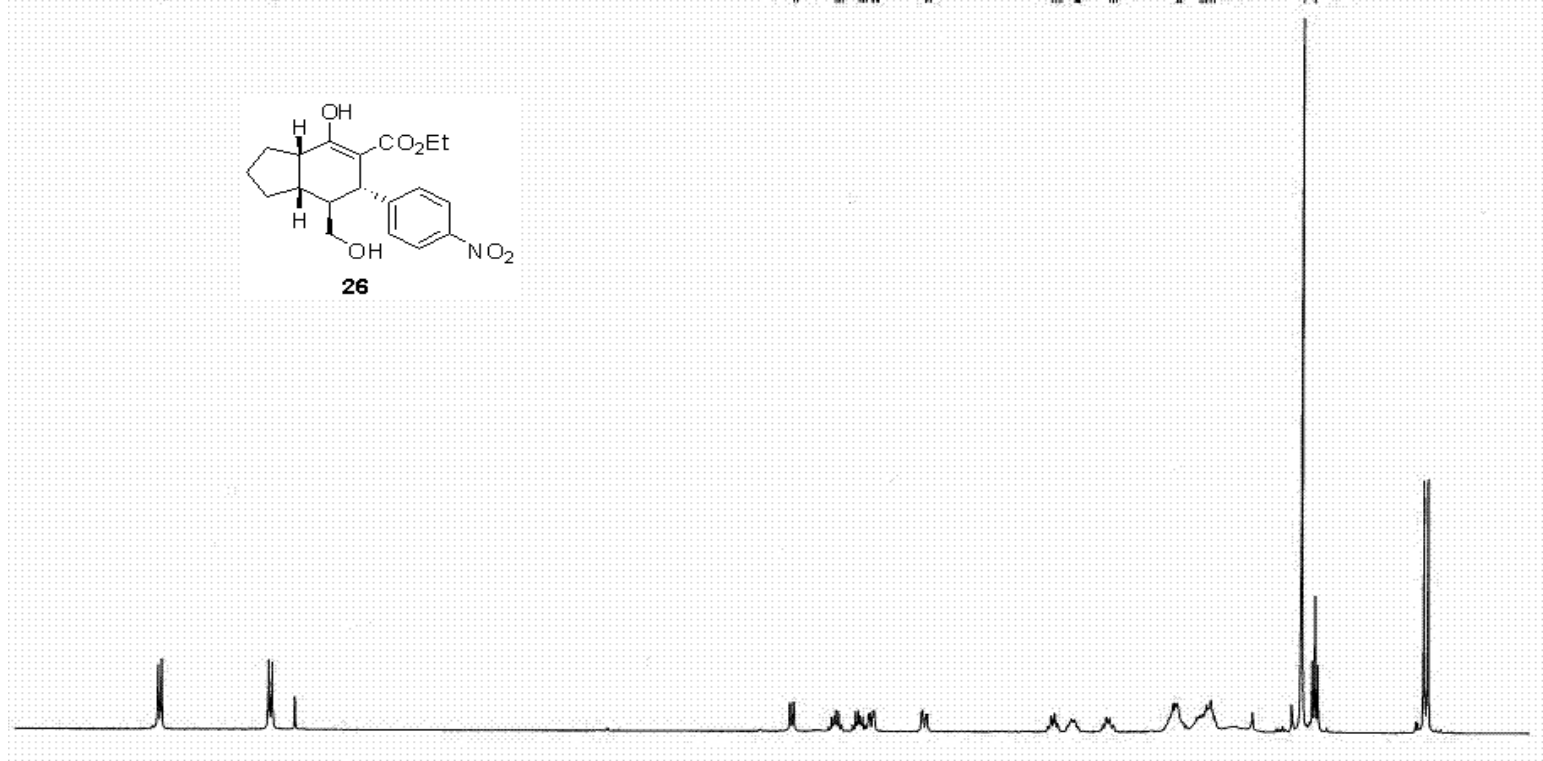

8.5 8.0 7.5 7.0 6.5 6.0 5.5 5.0 4.5 4.0 3.5 3.0 2.5 2.0 1.5 1.0 0.5 ppm

2.00

2.02

1.00

1.02

1.00

1.01

1.00

1.01

1.00

1.01

2.99

3.02

9.04

3.01

6.00

167.52

158.84

152.93

146.69

129.42

123.54

112.05

61.15

39.88

45.00

44.93

44.64

38.15

31.31

29.85

25.87

24.05

18.51

14.03

-3.78

-3.83

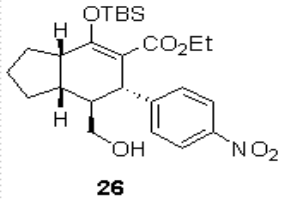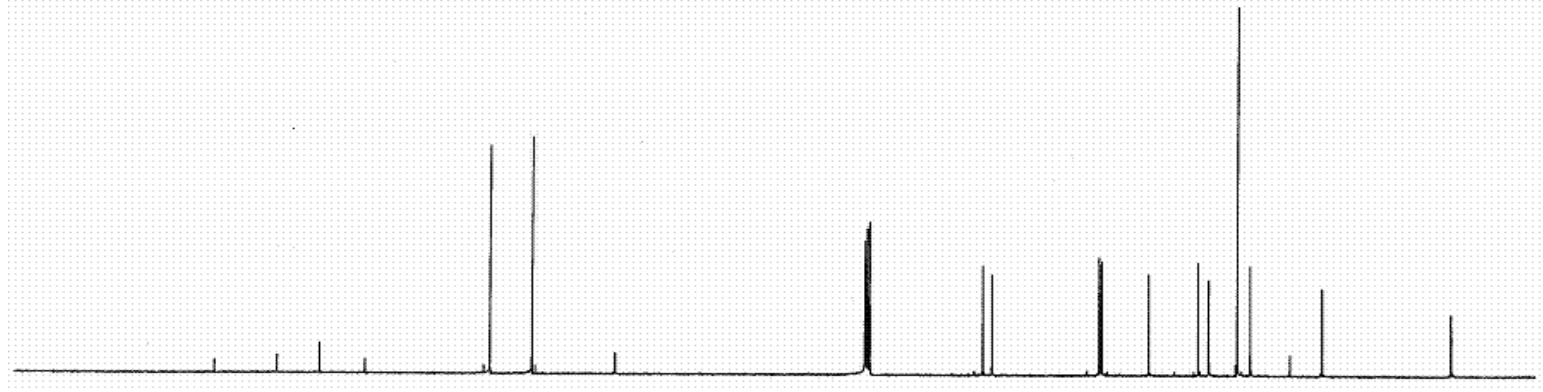

190 180 170 160 150 140 130 120 110 100 90 80 70 60 50 40 30 20 10 0 ppm
